# Supplementary material
Source: PubMed Central journal article supplement (PMC4867476)

## Supporting Information

### Structure-Based Design of 1,4-Dibenzoylpiperazines as $\beta$ -catenin/B-Cell Lymphoma 9 Protein–Protein Interaction Inhibitors

John A. Wisniewski, Jinya Yin, Kevin B. Teuscher, Min Zhang, Haitao Ji\*

Department of Chemistry, Center for Cell and Genome Science, University of Utah, Salt Lake City, Utah 84112–0850, USA

\* Correspondence to: Haitao Ji (E-mail: markji@chem.utah.edu)

### Table of Contents

|                                   | <b>Page</b> |
|-----------------------------------|-------------|
| Figure S1.....                    | S2          |
| Figure S2.....                    | S3          |
| Figure S3.....                    | S4          |
| Figure S4.....                    | S5          |
| Figure S5.....                    | S6          |
| Figure S6.....                    | S7          |
| Figure S7.....                    | S7          |
| Figure S8.....                    | S8          |
| Scheme S1.....                    | S9          |
| Scheme S2.....                    | S10         |
| Scheme S3.....                    | S11         |
| Scheme S4.....                    | S12         |
| Scheme S5.....                    | S13         |
| Experimental Procedures.....      | S14–S40     |
| Supplementary References.....     | S41         |
| HPLC Conditions and Tracers.....  | S42–S45     |
| NMR Spectra for <b>3–22</b> ..... | S46–S65     |

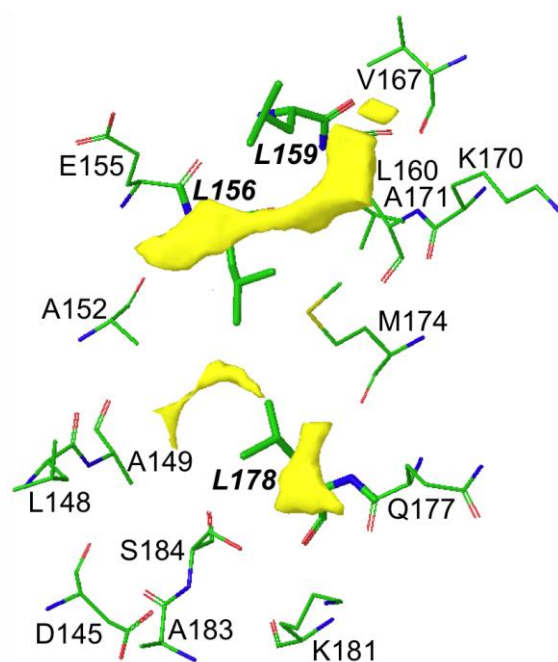

**Figure S1.** Stick model for the results of the hydrophobic SiteMap analysis (PDB id, 2GL7<sup>1</sup>). The threshold of the SiteMap contour was set to  $-0.5$  kcal/mol. The  $\beta$ -catenin residues are colored green.

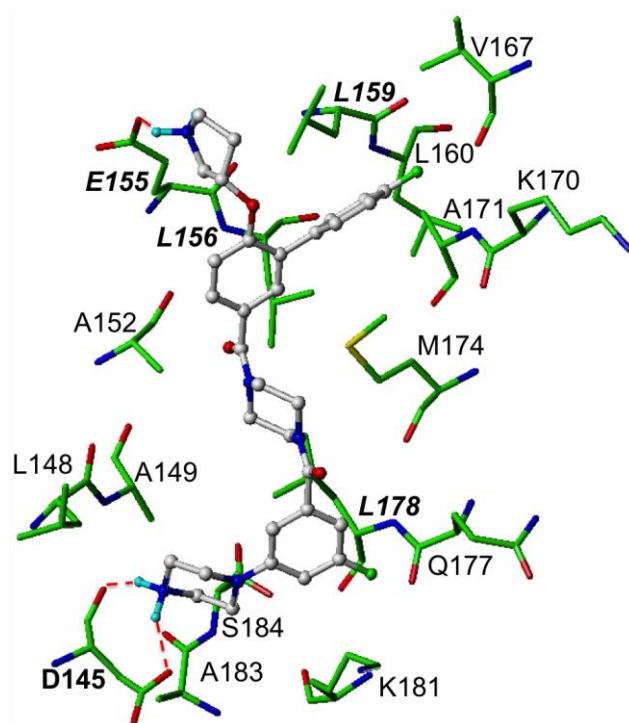

**Figure S2.** Stick model of the AutoDock predicted binding conformation of **3** in  $\beta$ -catenin (PDB id, 2GL7<sup>1</sup>). The  $\beta$ -catenin residues are colored green. Compound **3** is colored gray.

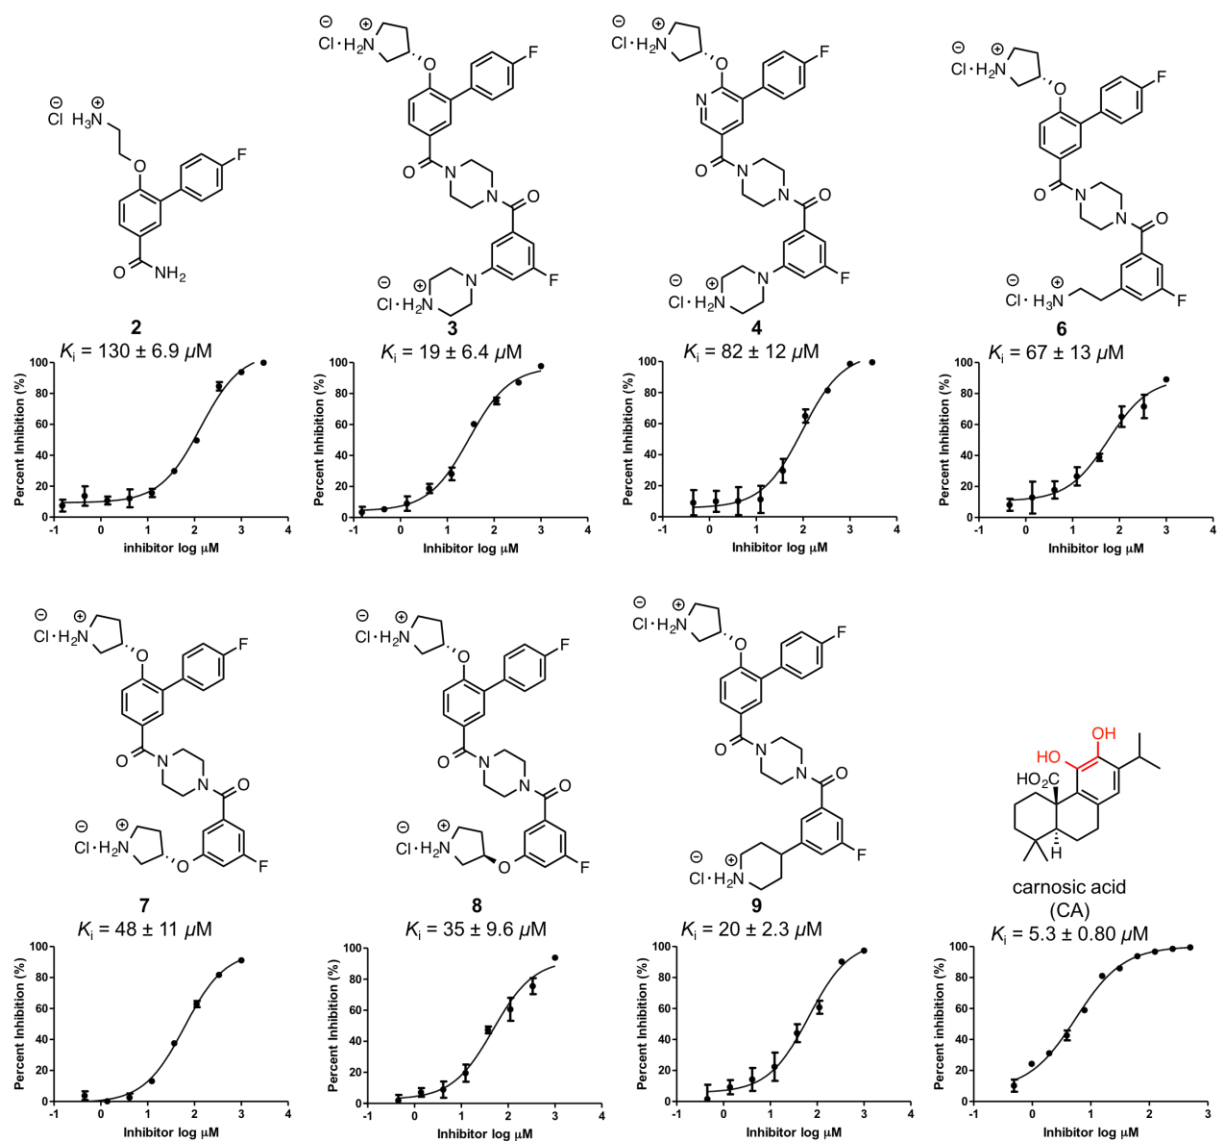

**Figure S3.** AlphaScreen competitive inhibition assay results of **2–4**, **5–9** and carnosic acid for the inhibition of the  $\beta$ -catenin/BCL9 PPI. Each set of data is expressed as mean  $\pm$  standard deviation ( $n = 3$ ). The substructure of pan assay interference compounds (PAINS<sup>2,3</sup>) in carnosic acid is colored red.

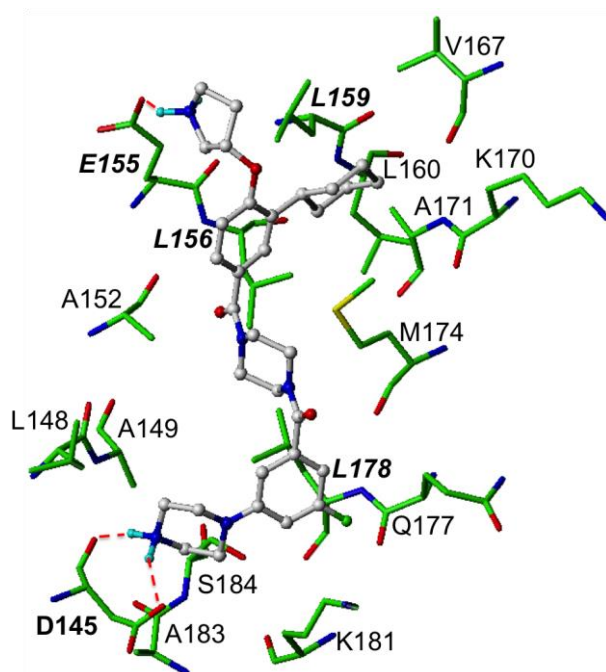

**Figure S4.** Stick model of the AutoDock predicted binding conformation of **3** in  $\beta$ -catenin (PDB id, 2GL7<sup>1</sup>). The  $\beta$ -catenin residues are colored green. Compound **3** is colored gray.

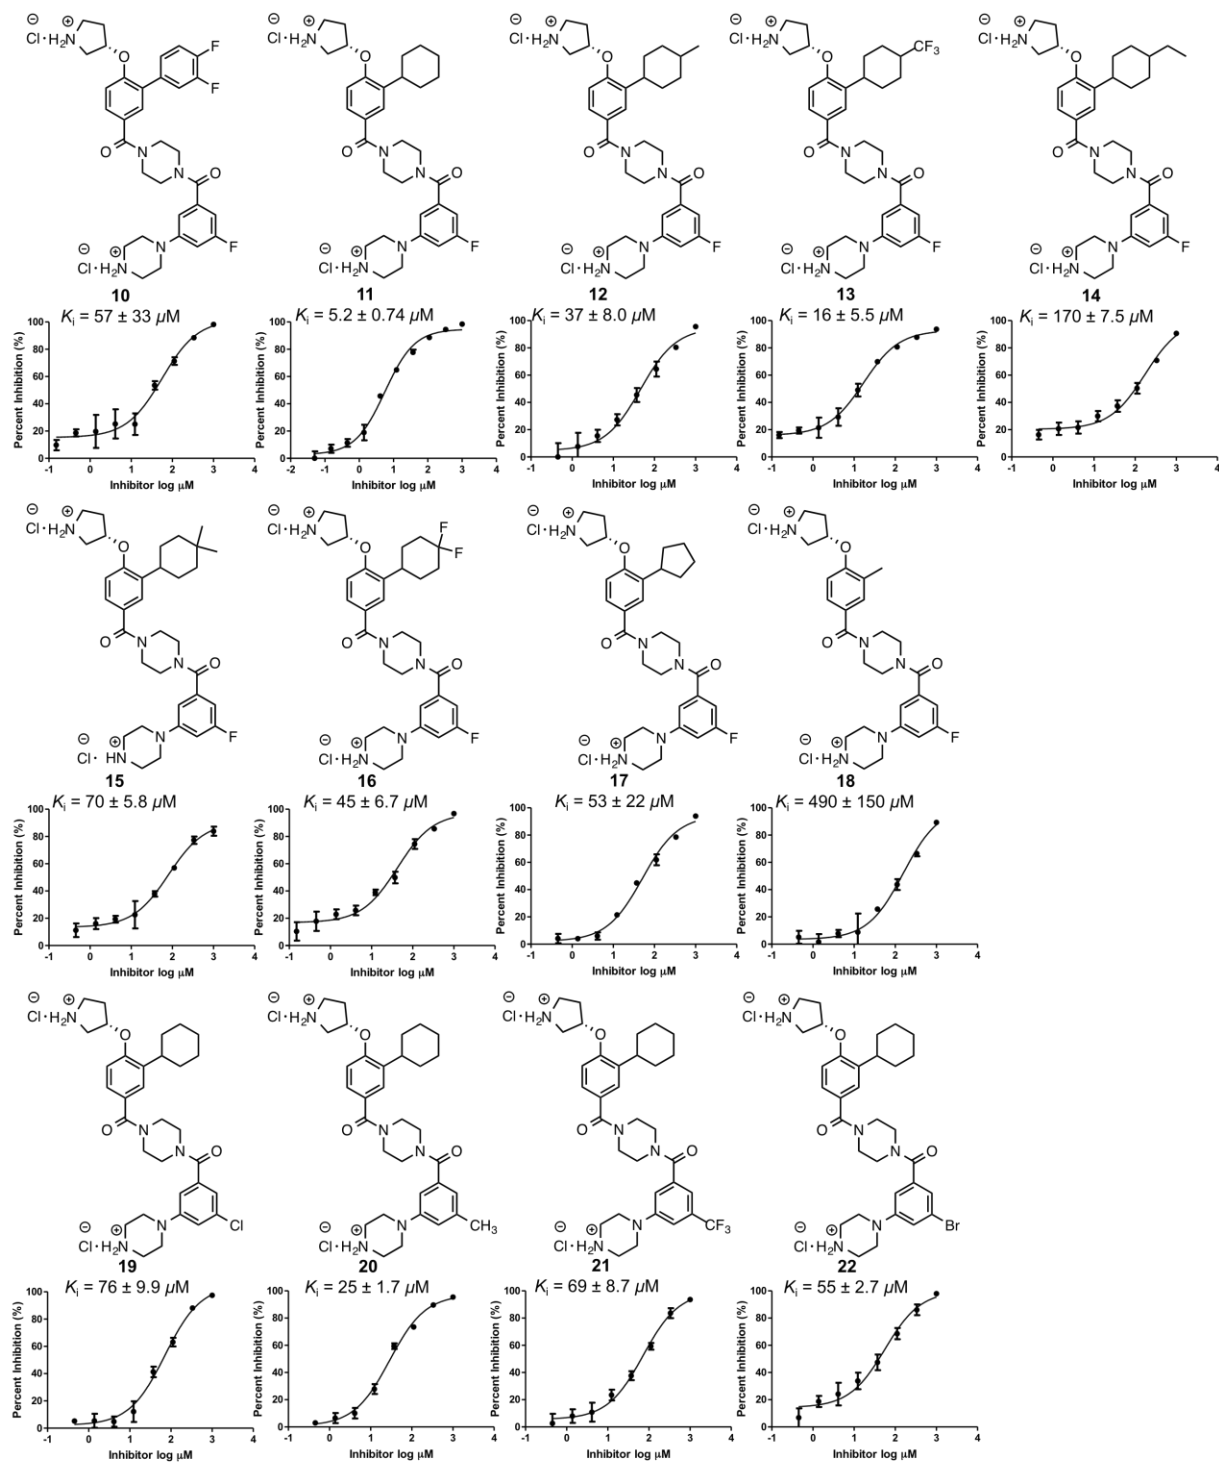

**Figure S5.** AlphaScreen competitive inhibition assay results of **10–22** for the inhibition of the  $\beta$ -catenin/BCL9 PPI. Each set of data is expressed as mean  $\pm$  standard deviation (n = 3).

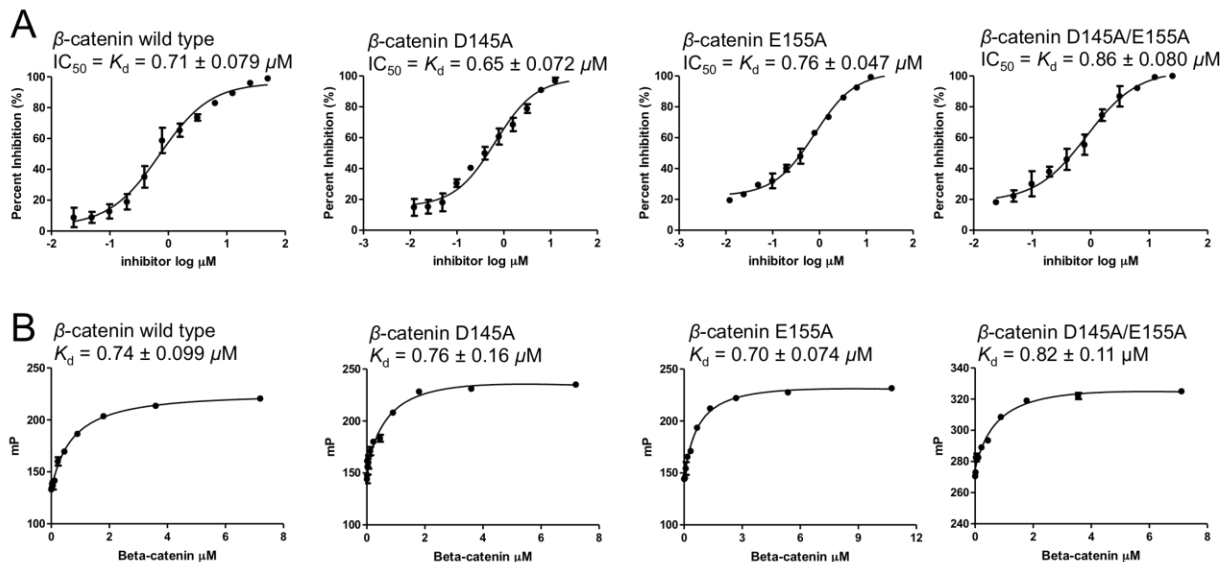

**Figure S6.** (A) AlphaScreen competitive binding assay to determine the apparent  $K_d$  values for the wild-type  $\beta$ -catenin/wild-type BCL9 PPI and the mutant  $\beta$ -catenin/wild-type BCL9 PPIs. (B) Fluorescence polarization saturation binding experiments to determine the  $K_d$  values for the wild-type  $\beta$ -catenin/wild-type BCL9 PPI and the mutant  $\beta$ -catenin/wild-type BCL9 PPIs. Each set of data is expressed as mean  $\pm$  standard deviation ( $n=3$ ). The concentrations of mutant  $\beta$ -catenin proteins used in the assays were the same as that of wild-type  $\beta$ -catenin protein.

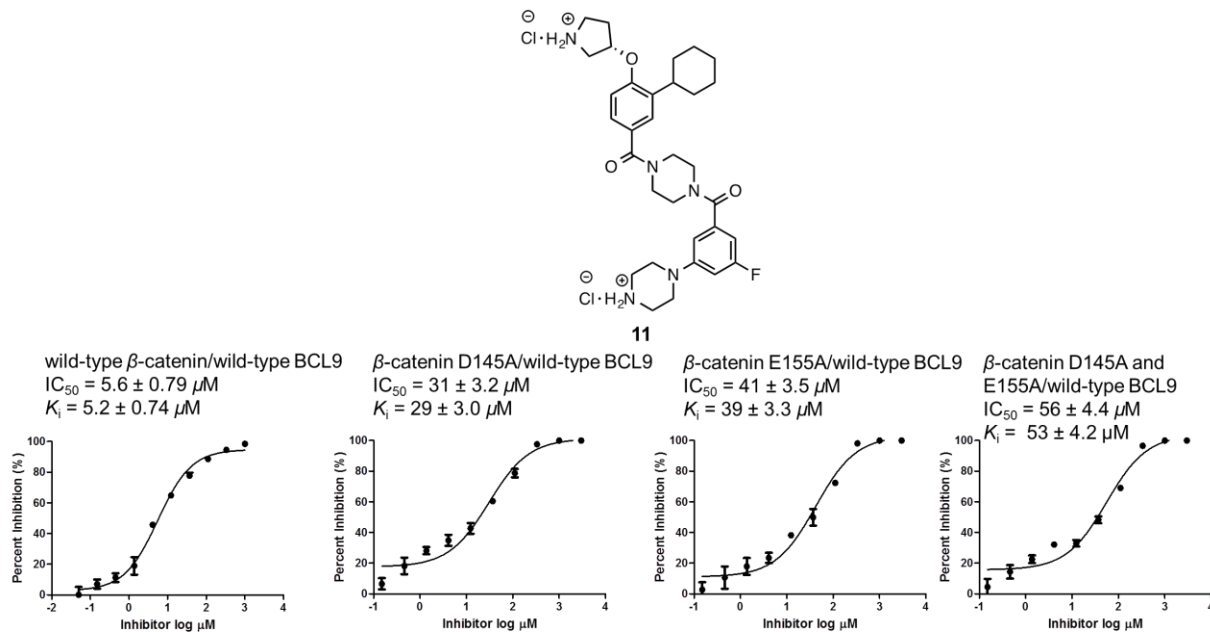

**Figure S7.** AlphaScreen competitive inhibition assay results of **11** with wild-type and mutant  $\beta$ -catenin proteins. Each set of data is expressed as mean  $\pm$  standard deviation ( $n=3$ ). The experimental detail for the AlphaScreen competitive inhibition assay has been described previously.

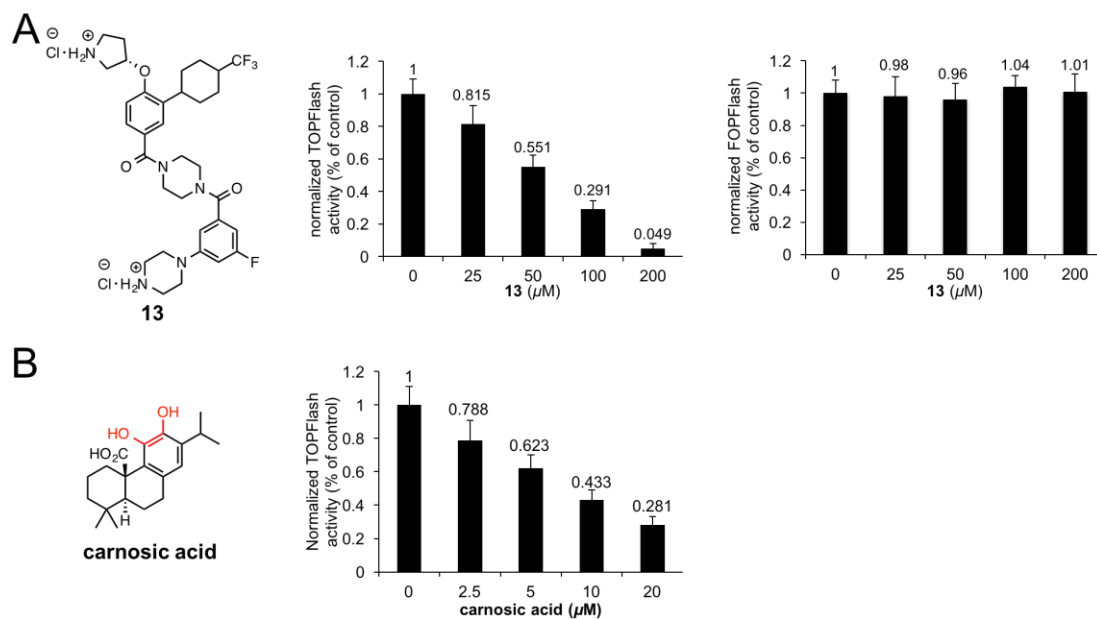

**Figure S8.** Effects of **13** and carnosic acid on the transactivation of the canonical Wnt signaling pathway determined by the luciferase reporter assay. (A) TOPFlash and FOPFlash luciferase reporter assay results of **13**. (B) TOPFlash luciferase reporter assay result of carnosic acid. Each set of data is expressed as mean  $\pm$  standard deviation ( $n = 3$ ).



## Scheme S1.

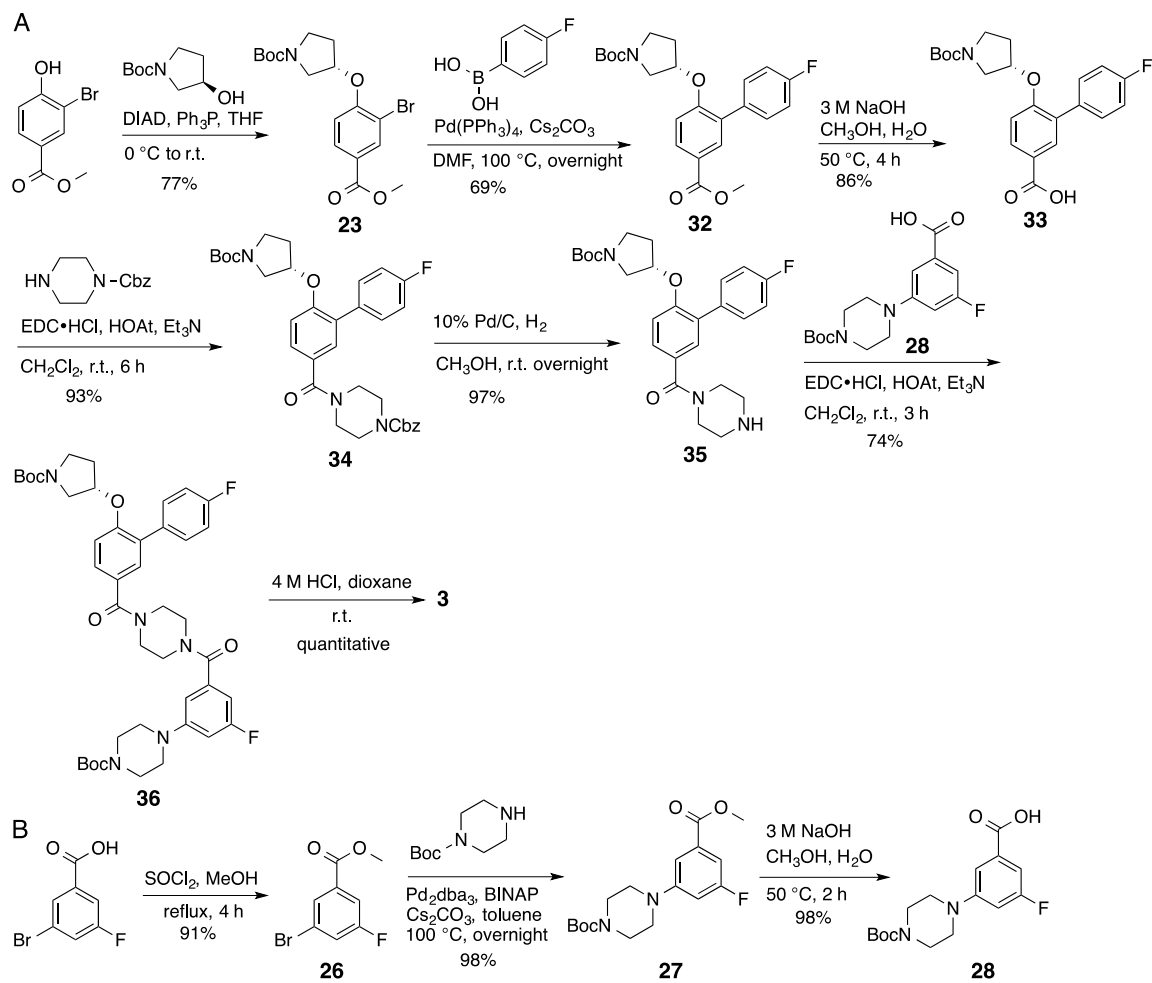

## Scheme S2.

Boc protected aminoethyl group was conveniently installed to **25** by the nickel-catalyzed reductive alkylation reaction developed by Weix and co-workers.<sup>4</sup>

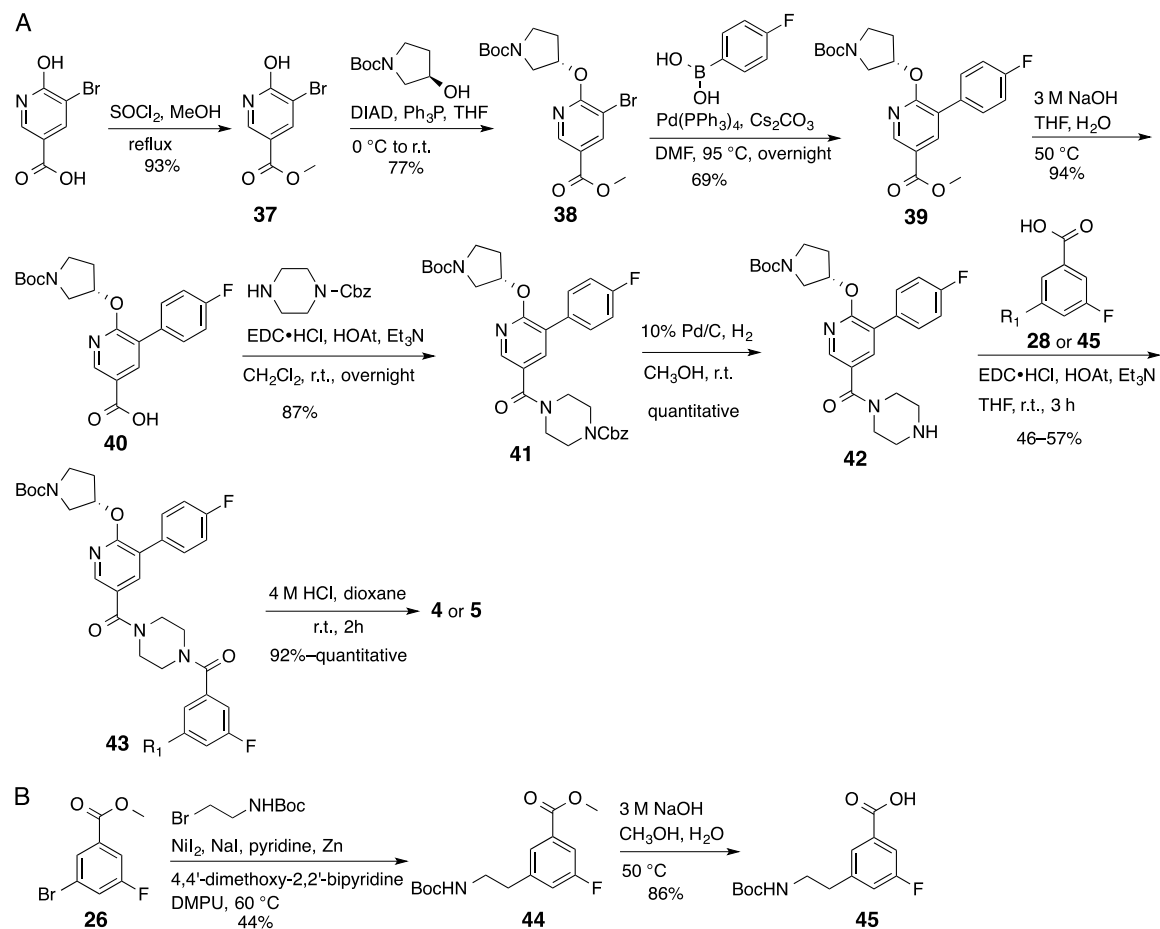

### Scheme S3.

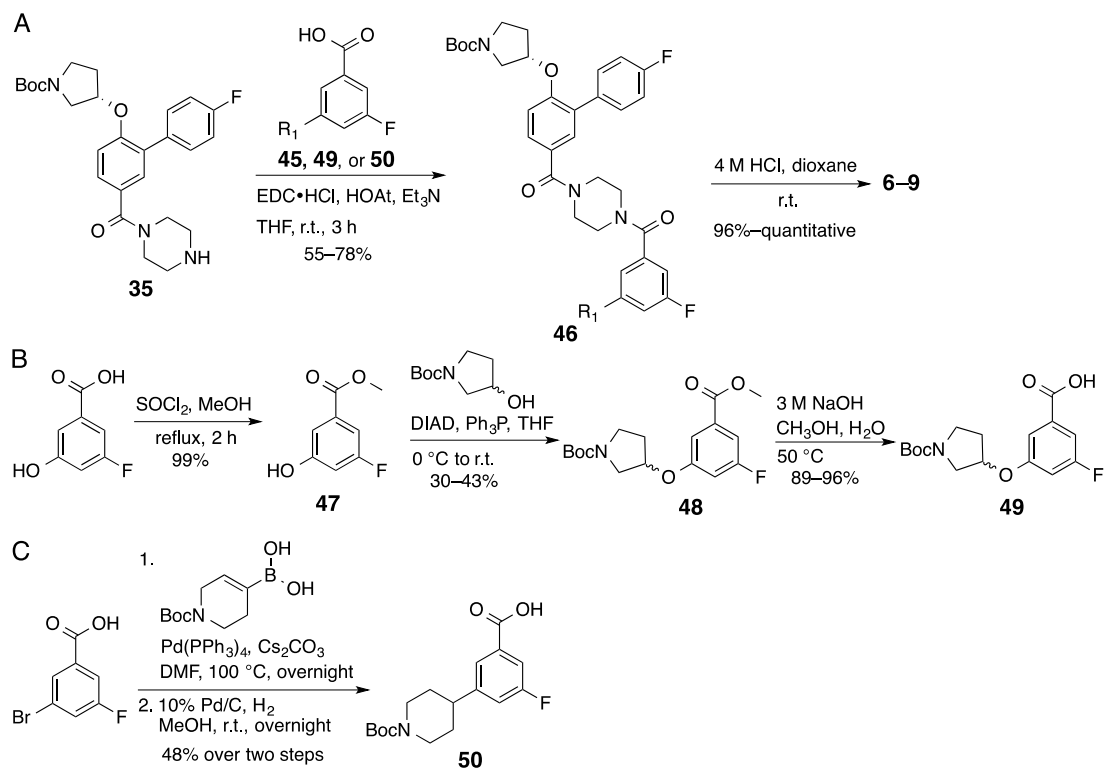

## Scheme S4.

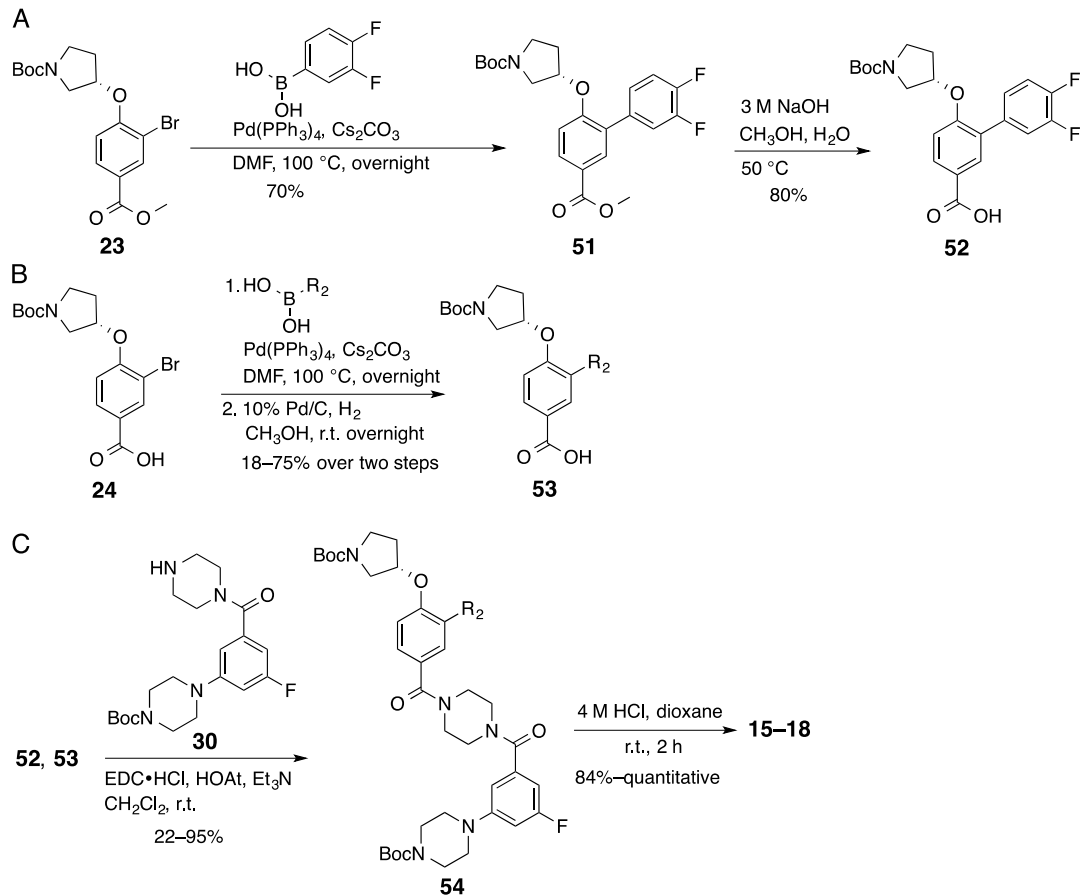

**Scheme S5.**

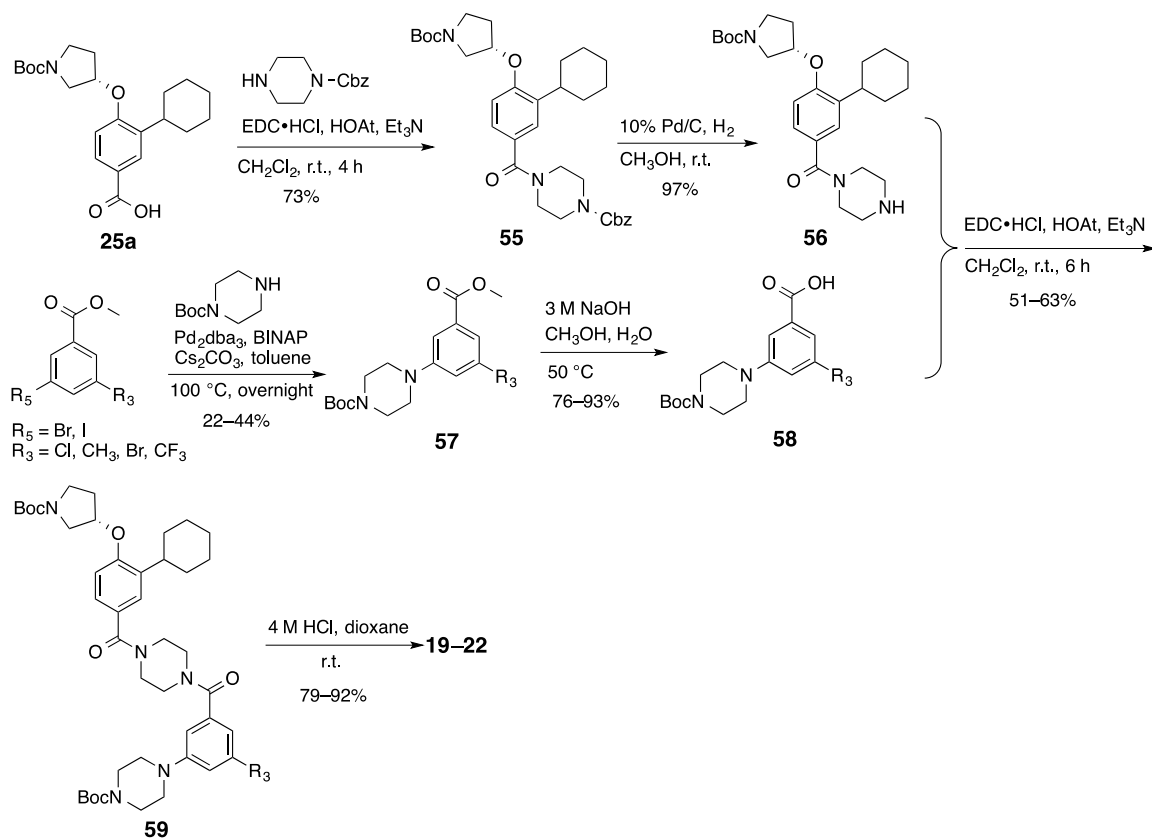

**Protein structure for computer modeling.** The crystallographic coordinates for human  $\beta$ -catenin (PDB id, 2GL7<sup>1</sup>, 2.60 Å resolution,  $R_{\text{cryst}} = 0.223$ ) were obtained from the Research Collaboratory for Structural Bioinformatics (RCSB) protein data bank. The preparation of the crystal structure and molecular modeling were achieved with the commercially available Schrodinger (<http://www.schrodinger.com/>), Accelrys Discovery Studio 3.0 (<http://accelrys.com/>), and SYBYL X2.0 (<http://www.tripos.com/>) software packages. The missing side chains of  $\beta$ -catenin were added in SYBYL X2.0. The protonation states of the residues were set to pH 7.0 when adding hydrogen. The AMBER 7 force field 99 and the AMBER FF99 charges within SYBYL X2.0 were used to optimize the orientation of hydrogen atoms and the missing side chains of the protein. After the protein complex was optimized. Chains B (Tcf4), C (BCL9), D (the second monomer of  $\beta$ -catenin), E (the second monomer of Tcf4), F (the second monomer of BCL9), and solvent molecules were removed, leaving only one monomer of  $\beta$ -catenin for further calculation. The residues in the BCL9 L366/I369/L373 binding site of  $\beta$ -catenin include D144–A146, L148, A149, A152, I153, E155–L160, D162–A171, M174, V175, Q177, L178, K180, K181, A183, S184, A187, I188, M194, and I198.

**SiteMap calculation.** This calculation was performed with SiteMap 2.6 in Schrodinger. The evaluation on a single binding site region was selected, and all residues of the BCL9 L366/I369/L373 binding site were included. At least 15 site points per reported site were required to initiate the SiteMap calculation. The more restrictive definition for hydrophobicity was used. The grid spacing was set to 0.35 Å. The site maps were cropped at 4 Å from nearest site point, and the OPLS-2005 force field was used to map the hydrophobic, H-bond donor and H-bond acceptor regions.

**Ligand docking using AutoDock 4.2.** The three-dimensional (3D) structures of the ligands were built, and the partial atomic charges were calculated using the Gasteiger–Marsili method. The rotatable bonds in the ligands were defined using AutoTors, which also united the nonpolar hydrogens and partial atomic charges to the bonded carbon atoms. The grid maps were calculated using AutoGrid. The AutoDock area was defined to include all of the residues in the BCL9 L366/I369/L373 binding site, and the grid spacing was set to 0.375 Å. Docking was performed using the Lamarckian genetic algorithm, and the pseudo-Solis and Wets method was applied for the local search. Each docking experiment was performed 100 times, yielding 100 docked conformations. The other settings were the default parameters. All of the ligands followed the same docking protocol. The results of the docking experiments were evaluated by the auxiliary clustering analysis and the visual inspection to match the proposed *critical binding elements*.

**Protein expression and purification.**  $\beta$ -Catenin mutants D145A, E155A, D145A/E155A have been made previously.<sup>5</sup> Wild-type  $\beta$ -catenin and its mutants (residues 138–686) were cloned into a pET-28b vector carrying a C-terminal 6  $\times$  histidine (Novagen), and transformed into *Escherichia coli* BL21 DE3 (Novagen). Cells were cultured in LB medium with 30  $\mu\text{g}/\text{mL}$  kanamycin until the  $\text{OD}_{600}$  was approximately 0.8, and then protein expression was induced with 400  $\mu\text{M}$  of IPTG at 20 °C overnight. Cells were lysed by sonication. The proteins were purified by Ni-NTA affinity chromatography (30210, Qiagen) and dialyzed against a buffer containing 20 mM of Tris (pH 8.5), 100 mM NaCl, 10% glycerol, and 3 mM DTT. The purity of  $\beta$ -catenin was greater than 95% as determined by SDS-PAGE gel analysis. Native non-denaturing gel electrophoresis was performed to confirm the homogeneity of the purified proteins. Thermal-shift assay was performed on an iCycler iQ Real Time Detection System (Bio-Rad) to monitor protein stability and detect protein aggregation. Protein unfolding was evaluated through measuring the

fluorescence changes of fluorescent dye Sypro Orange when interacting with wild-type or mutant  $\beta$ -catenin proteins. A temperature increment of 1°/min was applied. CD spectra were measured on a J-815 spectropolarimeter (Jasco). All spectra were recorded at room temperature, and the baseline control containing all of the substances except protein. Sample were prepared at a concentration around 1–5  $\mu$ M in a buffer of 10 mM potassium phosphate and 100 mM potassium fluoride at pH 7.0 to ensure that the transmission of light through the sample was not restricted. All proteins were stable and no aggregation was observed under storage or assay conditions. Proteins were aliquoted and stored at –80 °C.

**BCL9 peptide synthesis and purification.** Human BCL9 (residues 350–375), *N*-terminally biotinylated human BCL9 (residues 350–375), *N*-terminally fluorescein-labeled human BCL9 (residues 350–375), and *N*-terminally biotinylated human E-cadherin (residues 824–877) were synthesized by InnoPep Inc. (www.innopep.com) and HPLC purified by HPLC with purity > 95%. The structures were validated by LC/MS. The sequences of these peptides have been described previously.<sup>6</sup>

**AlphaScreen assays to determine the apparent  $K_d$  values for wild-type and mutant  $\beta$ -catenin/BCL9 interactions.** The experimental detail using AlphaScreen to determine the apparent  $K_d$  values for  $\beta$ -catenin/BCL9 and  $\beta$ -catenin/E-cadherin PPIs has been described previously.<sup>6</sup> The concentrations of mutant  $\beta$ -catenin proteins used in the assays were the same as that of wild-type  $\beta$ -catenin.

**Fluorescence polarization (FP) assays to determine the apparent  $K_d$  values for wild-type and mutant  $\beta$ -catenin/BCL9 interactions.** The FP experiments were performed in 96-well Microfluor 2 black plates (Waltham, MA), and the sample signals were read by a Synergy 2 plate reader (Biotek, Winooski, VT). The polarization was measured at room temperature with an excitation wavelength at 485 nm and an emission wavelength at 535 nm. All of the FP experiments were performed in an assay buffer of 137 mM NaCl, 2.7 mM KCl, 10 mM Na<sub>2</sub>HPO<sub>4</sub>, 2 mM KH<sub>2</sub>PO<sub>4</sub>, 100  $\mu$ g/mL of bovine  $\gamma$ -globulin, and 0.01% Triton X-100. The final reaction volume was set to 100  $\mu$ L. In the FP saturation binding experiments, the concentration of human BCL9 fluorescent tracer was fixed at 5 nM. The concentrations of  $\beta$ -catenin were ranged from 0 to 10  $\mu$ M in the assay buffer giving a final volume of 100  $\mu$ L. After the addition, each assay plate was covered black and gently mixed on an orbital shaker for 3 h before the polarization signals were recorded. The data were analyzed by nonlinear least-square analyses using GraphPad Prism 5.0 to derive the apparent  $K_d$  value. Each experiment was repeated three times, and the results were expressed as mean  $\pm$  standard deviation.

**AlphaScreen competitive inhibition assays using wild-type and mutant  $\beta$ -catenin proteins.** The experimental details of the AlphaScreen competitive inhibition assays for the  $\beta$ -catenin/BCL9 and  $\beta$ -catenin/E-cadherin PPIs have been described previously.<sup>5</sup> The concentrations of mutant  $\beta$ -catenin proteins used in the AlphaScreen competitive inhibition assays were the same as that of wild-type  $\beta$ -catenin protein.

**MTs Cell Viability Assay.** Colorectal cancer cell lines, SW480 and HCT116, lung adenocarcinoma cell line A549, and human embryonic kidney 293 cell line (HEK293) were seeded in 96-well plates at  $4 \times 10^3$  cells/well, maintained overnight at 37 °C, and incubated with the tested compounds at various concentrations in 5 mL Dulbecco's modified Eagle's media (DMEM, Sigma-Aldrich catalogue # D5523) with 1% fetal bovine serum (FBS, Thermo Fisher Scientific catalogue # 16140071). Cell viability was monitored after 72 h using a freshly prepared mixture of 1 part phenazine methosulfate (PMS, Sigma) solution (0.92 mg/mL) and 19 parts 3-(4,5-dimethylthiazol-2-yl)-5-(3-carboxymethoxyphenyl)-2-(4-sulfophenyl)-2H-tetrazolium (MTs,

Promega) solution (2 mg/mL). Cells were incubated in 10  $\mu$ L of this solution at 37 °C for 3 h, and  $A_{490}$  was measured. The effect of each compound is expressed as the concentration required to reduce  $A_{490}$  by 50% ( $IC_{50}$ ) relative to DMSO-treated cells. Experiments were performed in triplicate.

**Cell Transfection and Luciferase Assay.** FuGENE 6 (E2962, Promega) in a 96-well plate format was used for the transfection of HEK293 cells according to the manufacturer's instructions. HEK293 cells were co-transfected with 45 ng of the TOPFlash (with three wild-type Tcf binding sites) or FOPFlash (with three mutant Tcf binding sites) reporter gene, 135 ng pcDNA3.1- $\beta$ -catenin and 20 ng pCMV-RL normalization reporter gene. Cells were cultured at 37 °C for 24 h, and different concentrations of inhibitors were then added. After 24 h, the luciferase reporter activity was measured using the Dual-Glo system (E2940, Promega). Normalized luciferase activity in response to the treatment with the inhibitors was compared with that obtained from the cells treated with DMSO. Experiments were performed in triplicate.



## Chemical synthesis.

**General Methods, Reagents, and Materials.** All reagents were purchased from Aldrich and Acros Organics and used without further purification unless stated otherwise. Organic solution was concentrated under reduced pressure on a Büchi rotary evaporator using an isopropyl alcohol-dry ice bath. Thin-layer chromatography (TLC) was carried out on 0.25 mm pre-coated silica gel 60 F254 plates (SiliCycle Inc. Candida), and the compounds were visualized with a UV-visible lamp at 254 nm. Further visualization was achieved by staining with iodine. Column chromatography was performed with SilicaFlash® F60 (230–400 mesh) and commercial solvents. <sup>1</sup>H NMR and <sup>13</sup>C NMR spectra were recorded on a Varian VXR-500 (500 MHz), a Varian Inova-400 (400 MHz), or a Varian Unity-300 (300 MHz) spectrometer (125.7 MHz, 100 MHz, and 75 MHz for <sup>13</sup>C NMR spectra, respectively) in CDCl<sub>3</sub>, *d*<sup>4</sup>-methanol and D<sub>2</sub>O. Chemical shifts were reported as values in parts per million (ppm), and the reference resonance peaks were set at 7.26 ppm (CHCl<sub>3</sub>), 3.31 ppm (CD<sub>2</sub>HOD), and 4.80 ppm (HOD) for the <sup>1</sup>H NMR spectra and 77.23 ppm (CDCl<sub>3</sub>) and 49.00 ppm (CD<sub>3</sub>OD) for the <sup>13</sup>C NMR spectra. Low-resolution (LRMS) were determined on a Micromass Quattro II mass spectrometer with an ESI source. High-resolution mass spectra (HRMS) was recorded on Waters LCT Premier XE TOF with Acquity Classic UPLC.

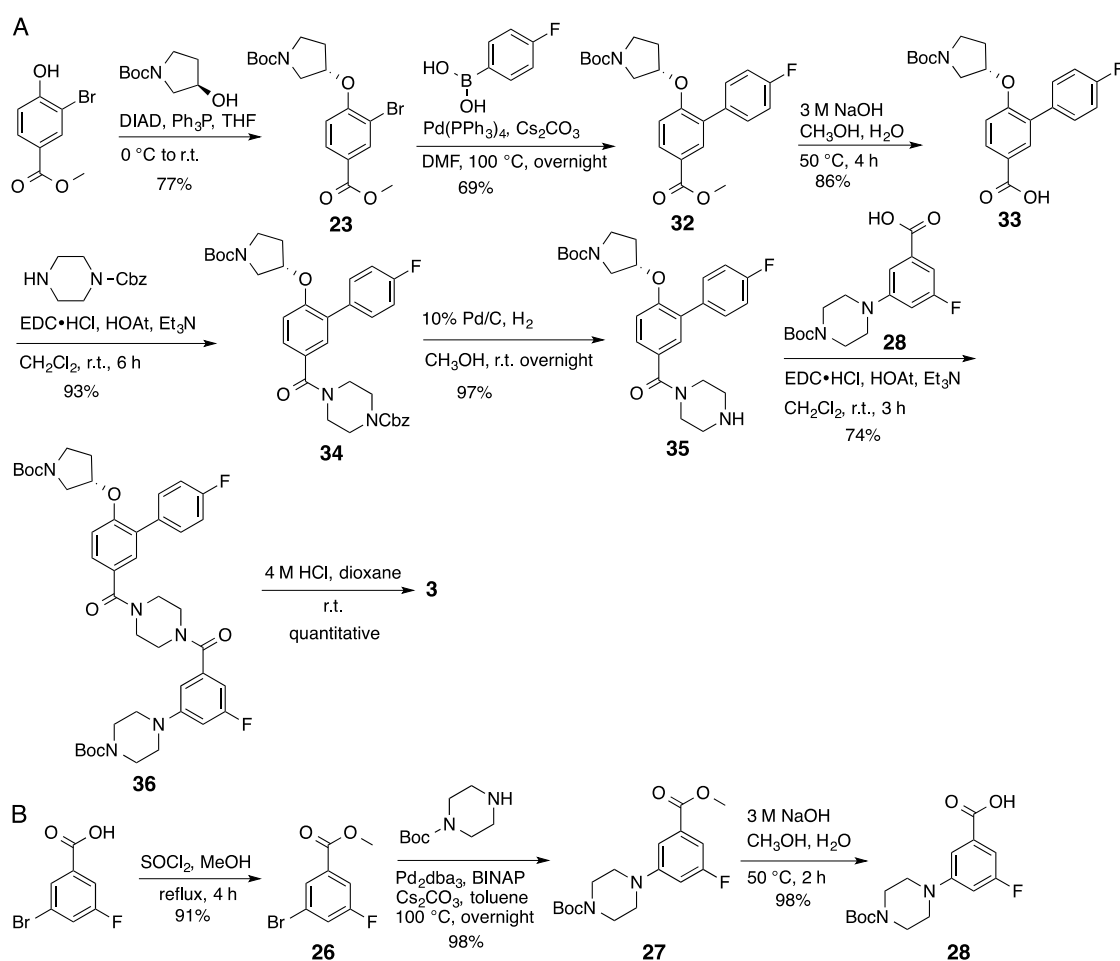

***tert*-Butyl (*S*)-3-(2-bromo-4-(methoxycarbonyl) phenoxy) pyrrolidine-1-carboxylate (**23**).** To a solution of methyl 3-bromo-4-hydroxybenzoate (0.626 g, 2.70 mmol) in dry THF (35 mL)

under anhydrous conditions was added (*R*)-*tert*-butyl 3-hydroxypyrrolidine-1-carboxylate (0.505 g, 2.70 mmol) and triphenyl phosphine (1.43 g, 5.39 mmol). The reaction mixture was then cooled in an ice bath, and DIAD (1.12 g, 5.56 mmol) dissolved in THF (10 mL) was added dropwise. The reaction mixture was stirred for 1 h at room temperature under argon. Upon completion the reaction was diluted with ethyl acetate (100 mL). The organic layer was washed with water (2 × 50 mL), brine (50 mL), dried over MgSO<sub>4</sub>, solids filtered, and the solvent removed under reduced pressure. The residue was then purified by column chromatography (silica gel, hexanes:EtOAc = 5:1) to yield **23** (0.837 g, 77% yield) as white solid. <sup>1</sup>H NMR (500 MHz, CDCl<sub>3</sub>): δ ppm 8.22 (s, 1H), 7.93 (d, *J* = 8.0 Hz, 1H), 6.85 (d, *J* = 8.0 Hz, 1H), 5.00–4.98 (m, 1H), 3.88 (s, 3H), 3.63–3.56 (m, 4H), 2.23–2.13 (m, 2H), 1.45 (s, 9H). <sup>13</sup>C NMR (125 MHz, CDCl<sub>3</sub>): δ ppm 165.67, 157.47, 143.72, 135.31, 130.41, 124.36, 113.33, 79.76, 79.74, 78.32, 52.29, 51.57, 51.22, 44.25, 43.84, 31.85, 31.02, 28.60. MS (ESI) *m/z* = 400.6 [M + H]<sup>+</sup>.

***tert*-Butyl (S)-3-((4'-fluoro-5-(methoxycarbonyl)-[1,1'-biphenyl]-2-yl) oxy) pyrrolidine-1-carboxylate (32)**. To a solution of **23** (1.00 g, 2.50 mmol) in dry DMF (50 mL) under anhydrous conditions was added (4-fluorophenyl) boronic acid (0.574 g, 4.10 mmol), Pd(PPh<sub>3</sub>)<sub>4</sub> (0.254 g, 0.220 mmol), and Cs<sub>2</sub>CO<sub>3</sub> (2.41 g, 7.40 mmol). The mixture was heated to 100 °C under argon and stirred for 20 h. The solvent was then removed under reduced pressure, and the residue was taken into EtOAc (100 mL). The organic solution was washed with water (2 × 50 mL) and brine (50 mL), dried over MgSO<sub>4</sub>, solids filtered, and solvent removed under reduced pressure. The residue was purified by column chromatography (silica gel, hexanes:EtOAc = 5:1) to yield **32** (0.71 g, 69% yield) as white solid. <sup>1</sup>H NMR (500 MHz, CDCl<sub>3</sub>): δ ppm 8.00 (d, 2H, *J* = 6.8 Hz), 7.43 (dd, 2H, *J* = 5.6, 8.2 Hz), 7.08 (t, 2H, *J* = 8.5 Hz), 6.94 (d, 1H, *J* = 9.0 Hz), 4.97–4.95 (m, 1H), 3.90 (s, 3H), 3.66–3.29 (m, 4H), 2.11–2.08 (m, 2H), 1.44 (s, 9H). <sup>13</sup>C NMR (125 MHz, CDCl<sub>3</sub>): δ ppm 166.77, 163.29, 161.33, 157.67, 154.61, 132.81, 131.17, 131.11, 130.69, 123.46, 115.15, 115.02, 113.14, 112.85, 79.77, 52.16, 51.60, 51.24, 51.23, 51.21, 44.23, 44.21, 44.20, 43.92, 43.89, 31.70, 30.98, 30.97, 28.61. MS (ESI) *m/z* = 416.7 [M + H]<sup>+</sup>.

**(S)-6-((1-(*tert*-Butoxycarbonyl) pyrrolidin-3-yl) oxy)-4'-fluoro-[1,1'-biphenyl]-3-carboxylic acid (33)**. To a solution of **32** (1.12 g, 2.70 mmol) in MeOH (10 mL) was added 6 M NaOH (10 mL), and the reaction was allowed to stir at room temperature for 6 h. MeOH was then removed under reduced pressure. The remaining aqueous solution was acidified with 12 M HCl to pH = 2. The product was extracted with CH<sub>2</sub>Cl<sub>2</sub> (50 mL) and the organics washed with water (2 × 50 mL), brine (50 mL), dried over MgSO<sub>4</sub>, solids filtered, and solvent removed under reduced pressure to yield **33** (0.94 g, 86% yield) as white solid. <sup>1</sup>H NMR (500 MHz, CDCl<sub>3</sub>): δ ppm 8.07–8.04 (m, 2H), 7.46–7.42 (m, 2H), 7.09 (t, *J* = 8.3 Hz, 2H), 6.97 (d, *J* = 9.5 Hz, 1H), 5.00–4.97 (m, 1H), 3.69–3.30 (m, 4H), 2.14–2.12 (m, 2H), 1.45 (s, 9H). <sup>13</sup>C NMR (125 MHz, CDCl<sub>3</sub>): δ ppm 171.39, 171.24, 163.33, 161.35, 158.29, 158.22, 154.83, 154.62, 133.41, 133.32, 131.38, 131.17, 131.14, 130.93, 130.87, 122.65, 115.23, 115.09, 114.92, 113.09, 112.75, 79.98, 77.26, 76.48, 51.63, 51.19, 44.26, 43.91, 31.67, 30.92, 28.59.

**Benzyl (S)-4-(6-((1-(*tert*-butoxycarbonyl) pyrrolidin-3-yl) oxy)-4'-fluoro-[1,1'-biphenyl]-3-carbonyl) piperazine-1-carboxylate (34)**. To a solution of **33** (0.681 g, 1.70 mmol) in anhydrous CH<sub>2</sub>Cl<sub>2</sub> (50 mL) was added benzyl piperazine-1-carboxylate (0.374 g, 1.70 mmol), triethylamine (0.8 mL, 6 mmol), EDC-HCl (0.644 g, 3.36 mmol), and HOAt (0.230 g, 1.70 mmol). The mixture was then stirred at room temperature for 4 h. The mixture was diluted with CH<sub>2</sub>Cl<sub>2</sub> (50 mL) and the organic solution was washed with water (2 × 50 mL), brine (50 mL), dried over MgSO<sub>4</sub>, solids filtered, and solvent removed under reduced pressure. The residue was then purified by column chromatography (silica gel, hexanes:EtOAc = 3:1) to yield white solid

(0.930 g, 93% yield).  $^1\text{H}$  NMR (500 MHz,  $\text{CDCl}_3$ ):  $\delta$  ppm 7.41–7.29 (m, 9H), 7.08–7.04 (m, 2H), 6.94 (d, 1H,  $J = 6.9$  Hz), 5.14 (s, 2H), 4.90–4.88 (m, 1H), 3.65–3.20 (m, 12H), 2.09–2.03 (m, 2H), 1.43 (s, 9H).  $^{13}\text{C}$  NMR (125 MHz,  $\text{CDCl}_3$ ):  $\delta$  ppm 173.10, 171.02, 170.10, 162.08 (d,  $J = 245.6$  Hz), 155.10, 155.02, 154.99, 154.45, 154.27, 136.19, 133.11, 133.01, 131.11, 130.89, 130.86, 130.22, 128.43, 128.20 (d,  $J = 4.8$  Hz), 128.08, 127.89, 114.93 (d,  $J = 20.9$  Hz), 114.80 (d,  $J = 20.9$  Hz), 113.74, 113.46, 79.53, 79.46, 77.14, 76.26, 67.38, 60.26, 51.34, 50.85, 44.05, 43.64, 31.41, 30.64, 28.36, 20.92, 20.57, 14.08.

***tert*-Butyl (S)-3-((4'-fluoro-5-(piperazine-1-carbonyl)-[1,1'-biphenyl]-2-yl) oxy) pyrrolidine-1-carboxylate (35).** To a solution of **34** (0.927 g, 0.154 mmol) in MeOH (20 mL) under argon was added 10% Pd on activated carbon (0.012 g). The argon was evacuated and exchanged with  $\text{H}_2$  gas three times and the reaction was allowed to stir under  $\text{H}_2$  for 3 h. The reaction mixture was filtered through celite, and the solvent removed under reduced pressure to yield **35** (0.699 g, 97% yield) as off-white solid.  $^1\text{H}$  NMR (300 MHz,  $\text{CDCl}_3$ ):  $\delta$  ppm 7.38–7.30 (m, 4H), 7.01 (t, 2H,  $J = 8.4$  Hz), 6.90 (d, 1H,  $J = 8.1$  Hz), 4.86–4.83 (m, 1H), 3.61–3.17 (m, 8H), 2.85–2.79 (m, 4H), 2.02–1.98 (m, 2H), 1.37 (s, 9H).  $^{13}\text{C}$  NMR (125 MHz,  $\text{CDCl}_3$ ):  $\delta$  ppm 169.77, 161.78 (d,  $J = 247.3$  Hz), 154.64, 154.54, 154.32, 154.17, 132.98 (d,  $J = 9.3$  Hz), 130.80, 130.70, 130.65, 129.90, 129.86, 128.46, 127.59, 114.64 (d,  $J = 21.7$  Hz), 114.53 (d,  $J = 21.3$  Hz), 113.61, 113.33, 79.37, 79.30, 76.89, 76.09, 51.16, 50.66, 49.69, 45.72, 43.81, 43.42, 31.12, 30.39, 28.11.

**Methyl 3-bromo-5-fluorobenzoate (26).** To an ice cold stirred solution of 3-bromo-5-fluorobenzoic acid (4.13 g, 18.9 mmol) in anhydrous methanol (40 mL) was added thionyl chloride (2.05 mL, 28.2 mmol) dropwise. The reaction mixture was allowed to stir for 15 min and then heated to reflux. Upon completion (1 h) the solvent was removed under reduced pressure, and the residue was taken into EtOAc (150 mL). The organic solution was washed with water ( $2 \times 150$  mL), brine (150 mL) and dried over  $\text{MgSO}_4$ . The solids were filtered, and solvent removed under reduced pressure to yield compound **26** (4.00 g, 91% yield) as brown liquid.  $^1\text{H}$  NMR (300 MHz,  $\text{CDCl}_3$ ):  $\delta$  ppm 7.95–7.93 (m, 1H), 7.64 (ddd, 1H,  $J = 1.4, 2.4, 8.8$  Hz), 7.41 (td, 1H,  $J = 2.1, 7.8$  Hz), 3.92 (s, 3H).  $^{13}\text{C}$  NMR (75 MHz,  $\text{CDCl}_3$ ):  $\delta$  ppm 164.59 (d,  $J = 3.1$  Hz), 162.25 (d,  $J = 251.9$  Hz), 133.36 (d,  $J = 8.0$  Hz), 128.54 (d,  $J = 3.3$  Hz), 123.38 (d,  $J = 24.5$  Hz), 122.60 (d,  $J = 9.2$  Hz), 115.48 (d,  $J = 23.1$  Hz), 52.66.

***tert*-Butyl 4-(3-fluoro-5-(methoxycarbonyl) phenyl) piperazine-1-carboxylate (27).** To a solution of **26** (0.117 g, 0.432 mmol) in dry toluene (25 mL) under anhydrous conditions was added *N*-Boc-piperazine (0.109 g, 0.585 mmol), tris (dibenzylideneacetone) dipalladium (0) ( $\text{Pd}_2(\text{dba})_3$ ) (0.0217g, 0.0237 mmol), 2,2'-bis (diphenylphosphino)-1,1'-binaphthyl (BINAP) (0.0551 g, 0.0886 mmol) and  $\text{Cs}_2\text{CO}_3$  (0.1981 g, 0.608 mmol). The mixture was heated to 90 °C in a pressurized flask and stirred for 20 h. The solvent was then removed under reduced pressure, and the residue was taken into EtOAc (100 mL). The organic solution was washed with water ( $2 \times 50$  mL) and brine (50 mL), dried over  $\text{MgSO}_4$ , solids filtered, and solvent removed under reduced pressure. The residue was purified by column chromatography (silica gel, hexanes:EtOAc = 9:1) to yield **27** (0.143 g, 98% yield) as white solid.  $^1\text{H}$  NMR (300 MHz,  $\text{CDCl}_3$ ):  $\delta$  ppm 7.37 (dd, 1H,  $J = 1.3, 2.3$  Hz), 7.18 (ddd, 1H,  $J = 1.3, 2.3, 8.6$  Hz), 6.75 (td, 1H,  $J = 2.4, 11.6$  Hz), 3.90 (s, 3H), 3.58 (t, 4H,  $J = 5.1$  Hz), 3.19 (t, 4H,  $J = 5.1$  Hz), 1.48 (s, 9H).  $^{13}\text{C}$  NMR (125 MHz,  $\text{CDCl}_3$ ):  $\delta$  ppm 166.27 (d,  $J = 3.71$  Hz), 163.44 (d,  $J = 244.5$  Hz), 154.60, 152.50 (d,  $J = 9.8$  Hz), 132.40 (d,  $J = 9.6$  Hz), 112.62 (d,  $J = 2.3$  Hz), 107.17 (d,  $J = 23.8$  Hz), 107.04 (d,  $J = 25.3$  Hz), 80.12, 52.35, 48.51, 28.39.

**3-(4-(*tert*-Butoxycarbonyl) piperazin-1-yl)-5-fluorobenzoic acid (28).** The synthesis of compound **28** followed the same procedure as for compound **33** to afford white solid (0.0779 g,

98% yield).  $^1\text{H}$  NMR (300 MHz,  $\text{CD}_3\text{OD}$ ):  $\delta$  ppm 7.41 (s, 1H), 7.12 (d, 1H,  $J = 8.6$  Hz), 6.92 (td, 1H,  $J = 2.1, 11.9$  Hz), 3.57 (t, 4H,  $J = 5.0$  Hz), 3.21 (t, 4H,  $J = 5.1$  Hz), 1.48 (s, 9H).  $^{13}\text{C}$  NMR (125 MHz,  $\text{CDCl}_3$ ):  $\delta$  ppm 170.67, 163.43 (d,  $J = 245.0$  Hz), 154.71, 152.47 (d,  $J = 9.8$  Hz), 131.68 (d,  $J = 10.0$  Hz), 113.08 (d,  $J = 2.1$  Hz), 107.79 (d,  $J = 25.6$  Hz), 107.72 (d,  $J = 23.9$  Hz), 80.34, 48.48, 28.38.

***tert*-Butyl (S)-4-(3-(4-(6-((1-*tert*-butoxycarbonyl) pyrrolidin-3-yl) oxy)-4'-fluoro-[1,1'-biphenyl]-3-carbonyl) piperazine-1-carbonyl)-5-fluorophenyl) piperazine-1-carboxylate (36).** To a solution of **35** (0.066 g, 0.14 mmol) in anhydrous  $\text{CH}_2\text{Cl}_2$  (50 mL) was added **28** (0.046 g, 0.14 mmol), triethylamine (0.066 mL, 0.494 mmol), EDC-HCl (0.053 g, 0.28 mmol), and HOAt (0.019 g, 0.14 mmol). The mixture was then stirred at room temperature for 4 h. The mixture was diluted with  $\text{CH}_2\text{Cl}_2$  (50 mL), and the organic solution was washed with water ( $2 \times 50$  mL), brine (50 mL), dried over  $\text{MgSO}_4$ , solids filtered, and solvent removed under reduced pressure. The residue was then purified by column chromatography (silica gel,  $\text{CH}_2\text{Cl}_2$ :MeOH = 98:2) to yield **36** as white solid (0.0811 g, 74% yield).  $^1\text{H}$  NMR (500 MHz,  $\text{CD}_3\text{OD}$ ):  $\delta$  ppm 7.46–7.44 (m, 4H), 7.18 (t, 1H,  $J = 6.5$  Hz), 7.11 (t, 2H,  $J = 8.8$  Hz), 6.91–6.79 (m, 2H), 5.08–5.06 (m, 1H), 3.78–3.40 (m, 16H), 3.21 (t, 4H,  $J = 4.5$  Hz), 2.12–2.09 (m, 2H), 1.48 (s, 9H), 1.43 (s, 9H).  $^{13}\text{C}$  NMR (125 MHz,  $\text{CD}_3\text{OD}$ ):  $\delta$  ppm 172.37, 171.71 (d,  $J = 2.9$  Hz), 165.02 (d,  $J = 244.3$  Hz), 163.61 (d,  $J = 245.6$  Hz), 156.73, 156.44, 156.38 156.32, 154.59 (d,  $J = 10.3$  Hz), 138.9 (d,  $J = 9.3$  Hz), 134.92, 132.71, 132.46, 132.40, 132.34, 131.40 (d,  $J = 6.7$  Hz), 129.44, 129.31 (d,  $J = 15.9$  Hz), 115.92 (d,  $J = 21.7$  Hz), 115.87 (d,  $J = 21.7$  Hz), 115.56, 115.41, 110.89 (d,  $J = 2.2$  Hz), 105.16 (d,  $J = 24.1$  Hz), 104.95 (d,  $J = 25.7$  Hz), 81.48, 81.14, 81.05, 78.59, 78.05, 52.70, 52.20, 49.33, 45.34, 44.98, 40.23, 34.79, 32.22, 31.64, 31.49, 30.13, 28.80, 28.71.

**(S)-4-(3-Fluoro-5-(piperazin-1-yl) benzoyl) piperazin-1-yl (4'-fluoro-6-(pyrrolidin-3-yloxy)-[1,1'-biphenyl]-3-yl) methanone hydrochloride (3).** To compound **36** (0.080 g, 0.103 mmol) under anhydrous conditions was added 4 M HCl in dioxane (10 mL), and the mixture was stirred at room temperature for 1 h. The solvent was then removed under reduced pressure. The product was dissolved in DI water (20 mL) and the aqueous layer was washed with ethyl acetate ( $3 \times 20$  mL). The resulting aqueous solution was frozen and lyophilized to yield **3** (0.0664 g, quantitative yield) as white solid.  $^1\text{H}$  NMR (500 MHz,  $\text{d}^6$ -DMSO):  $\delta$  ppm 9.20 (brs, 2H), 8.99 (brs, 2H), 7.61 – 7.57 (m, 2H), 7.43 (dd, 1H,  $J = 1.5, 8.5$  Hz), 7.37 (s, 1H), 7.24 – 7.18 (m, 3H), 6.90 (d, 1H,  $J = 12.0$  Hz), 6.80 (s, 1H), 6.65 (d, 1H,  $J = 8.0$  Hz), 5.18 – 5.12 (m, 1H), 3.66 – 3.06 (m, 20H), 2.21 – 2.13 (m, 1H), 2.07 – 2.02 (m, 1H);  $^{13}\text{C}$  NMR (125 MHz,  $\text{CD}_3\text{OD}$ ):  $\delta$  ppm 171.03, 170.27, 163.79 (d,  $J = 244.4$  Hz), 162.55 (d,  $J = 243.5$  Hz), 155.06, 152.41, 152.33, 138.06, 137.98, 133.58, 131.38, 131.26, 130.48, 128.74, 128.37, 114.95 (d,  $J = 21.3$  Hz), 114.10, 110.23, 105.18 (d,  $J = 23.5$  Hz), 104.39 (d,  $J = 25.8$  Hz), 76.85, 50.62, 48.38–47.36 (m, 4C), 45.58, 44.42, 43.31, 30.95; HRMS (ESI)  $m/z$  calculated for  $\text{C}_{32}\text{H}_{35}\text{F}_2\text{N}_5\text{O}_3$  ( $\text{M}+\text{H}$ ) $^+$  = 576.2781, found 576.2786.

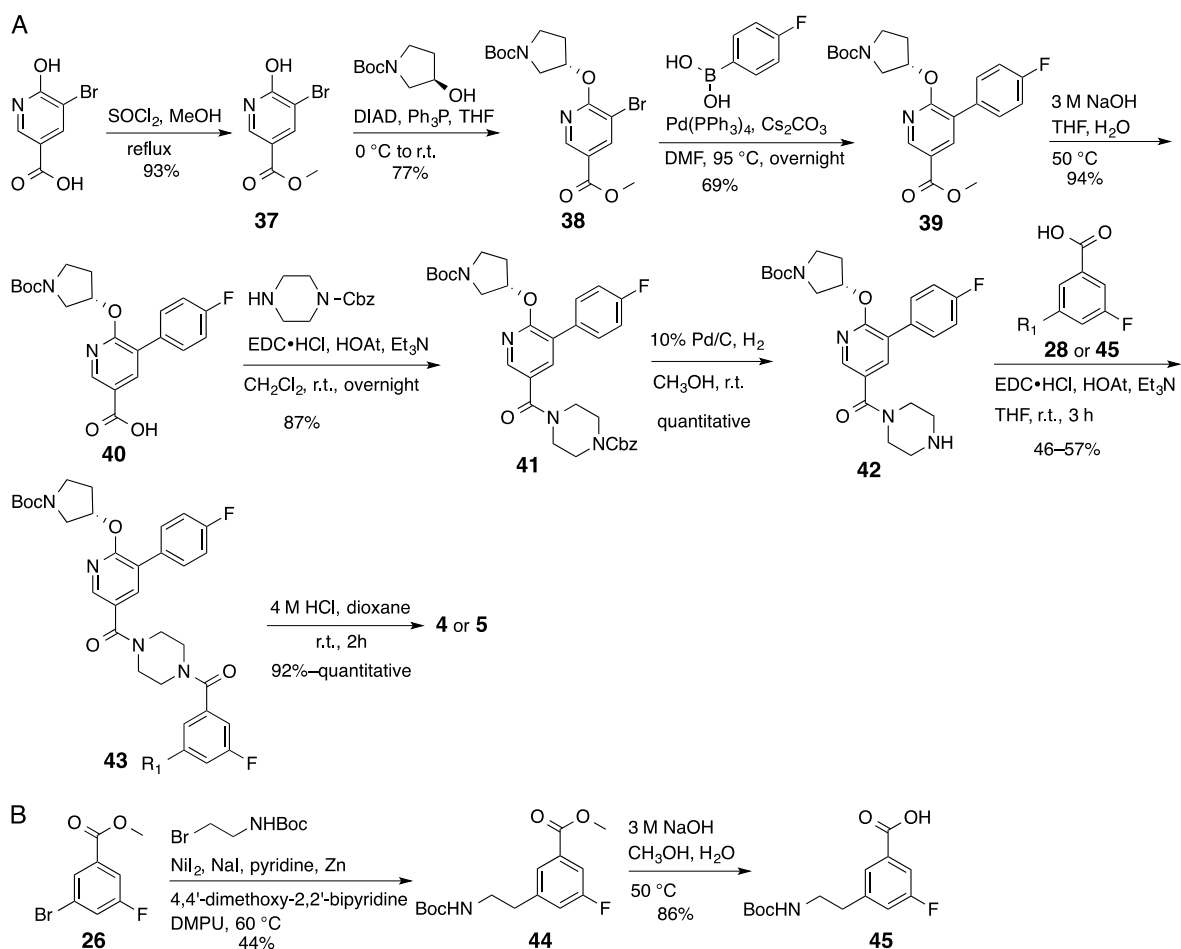

**Methyl 5-bromo-6-hydroxynicotinate (37).** To an ice cold stirred solution of 5-bromo-6-hydroxy nicotinic acid (2.03 g, 9.31 mmol) in anhydrous methanol (40 mL) was added thionyl chloride (1.01 mL, 13.9 mmol) dropwise. The reaction mixture was allowed to stir for 15 min and then heated to reflux. Upon completion (1 h) the solvent was removed under reduced pressure, and the residue was taken into EtOAc (150 mL). The organic solution was washed with water (2 × 150 mL), brine (150 mL), and dried over MgSO<sub>4</sub>. The solids were filtered, and solvent removed under reduced pressure to yield compound **37** (2.01 g, 93% yield) as off-white solid. <sup>1</sup>H NMR (500 MHz, CD<sub>3</sub>OD): δ ppm 12.65 (s, 1H), 8.11 (d, 1H, *J* = 2.3 Hz), 8.04 (d, 1H, *J* = 2.3 Hz), 3.73 (s, 3H). <sup>13</sup>C NMR (125 MHz, CD<sub>3</sub>OD): δ ppm 172.94, 168.07, 150.22, 149.46, 124.33, 118.41, 61.60.

**Methyl (S)-5-bromo-6-((1-(tert-butoxycarbonyl) pyrrolidin-3-yl) oxy) nicotinate (38).** To a solution of **37** (0.626 g, 2.70 mmol) in dry THF (35 mL) under anhydrous conditions was added (*R*)-*tert*-butyl 3-hydroxypyrrolidine-1-carboxylate (0.505 g, 2.70 mmol) and triphenyl phosphine (1.43 g, 5.39 mmol). The reaction mixture was then cooled in an ice bath, and DIAD (1.12 g, 5.56 mmol) dissolved in THF (10 mL) was added dropwise. The reaction mixture was stirred for 1 h at room temperature under argon. Upon completion the reaction was diluted with ethyl acetate (100 mL). The organic layer was washed with water (2 × 50 ml), brine (50 mL), dried over MgSO<sub>4</sub>, solids filtered, and the solvent removed under reduced pressure. The residue was then purified by column chromatography (silica gel, hexanes:EtOAc = 7:1) to yield **38** (0.837g, 77% yield) as white solid. <sup>1</sup>H NMR (500 MHz, CDCl<sub>3</sub>): δ ppm 8.70 (d, 1H, *J* = 2.0 Hz), 8.38 (d,

1H,  $J = 2.1$  Hz), 5.64–5.62 (m, 1H), 3.91 (s, 3H), 3.72–3.69 (m, 1H), 3.59–3.52 (m, 3H), 2.21–2.17 (m, 2H), 1.46 (s, 9H).  $^{13}\text{C}$  NMR (125 MHz,  $\text{CDCl}_3$ ):  $\delta$  ppm 164.65, 161.64, 154.51, 147.88, 142.55, 121.08, 107.19, 79.47, 72.19, 52.30, 51.65, 44.02, 28.49.

**Methyl (S)-6-((1-(*tert*-butoxycarbonyl) pyrrolidin-3-yl) oxy)-5-(4-fluorophenyl) nicotinate (39).** The synthesis of compound **39** followed the same procedure as for compound **32**. Column chromatography (silica gel, hexanes:EtOAc = 5:1) afforded white solid (0.147 g, 69% yield).  $^1\text{H}$  NMR (500 MHz,  $\text{CDCl}_3$ ):  $\delta$  ppm 8.74 (s, 1H), 8.16 (s, 1H), 7.48–7.45 (m, 2H), 7.09–7.06 (m, 2H), 5.69–5.66 (m, 1H), 3.90 (s, 3H), 3.68–3.30 (m, 4H), 2.13–2.11 (m, 2H), 1.42 (s, 9H).  $^{13}\text{C}$  NMR (125 MHz,  $\text{CDCl}_3$ ):  $\delta$  ppm 165.76, 162.49 (d,  $J = 247.9$  Hz), 162.06, 154.56, 142.28, 139.46, 130.72 (d,  $J = 8.2$  Hz), 123.57, 120.34, 115.27 (d,  $J = 22.0$  Hz), 79.46, 52.15, 28.47.

**(S)-6-((1-(*tert*-Butoxycarbonyl) pyrrolidin-3-yl) oxy)-5-(4-fluorophenyl) nicotinic acid (40).** The synthesis of compound **40** followed the same procedure as for compound **33** (except solvent  $\text{CH}_3\text{OH}$  was replaced by THF) to afford white solid (0.130 g, 94% yield).  $^1\text{H}$  NMR (500 MHz,  $\text{CD}_3\text{OD}$ ):  $\delta$  ppm 8.74 (d, 1H,  $J = 2.2$  Hz), 8.18 (s, 1H), 7.52 (dd, 2H,  $J = 5.6$  Hz,  $J = 8.0$  Hz), 7.13 (t, 2H,  $J = 8.7$  Hz), 5.72–5.69 (m, 1H), 3.65–3.48 (m, 3H), 3.40–3.35 (m, 1H), 2.23–2.13 (m, 2H), 1.44 (s, 4.5H), 1.42 (s, 4.5H).  $^{13}\text{C}$  NMR (125 MHz,  $\text{CD}_3\text{OD}$ ):  $\delta$  ppm 168.20, 163.95 (d,  $J = 246.4$  Hz), 163.36, 156.56, 156.54, 149.60, 140.79, 133.02, 132.13 (d,  $J = 8.2$  Hz), 124.97, 122.32, 116.20 (d,  $J = 21.8$  Hz), 116.17 (d,  $J = 21.9$  Hz), 81.66, 81.11, 77.31, 76.61, 53.28, 52.81, 45.53, 45.10, 32.39, 31.17, 28.79.

**Benzyl (S)-4-(6-((1-(*tert*-butoxycarbonyl) pyrrolidin-3-yl) oxy)-5-(4-fluorophenyl) nicotinoyl) piperazine-1-carboxylate (41).** The synthesis of compound **41** followed the same procedure as for compound **34**. Column chromatography (silica gel, hexanes:EtOAc = 1:1) afforded white solid (0.168 g, 87% yield).  $^1\text{H}$  NMR (500 MHz,  $\text{CDCl}_3$ ):  $\delta$  ppm 8.19 (d, 1H,  $J = 7.8$  Hz), 7.68 (s, 1H), 7.46–7.44 (m, 2H), 7.34–7.28 (m, 5H), 7.09–7.05 (m, 2H), 5.64–5.61 (m, 1H), 5.13 (s, 2H), 3.64–3.33 (m, 12H), 2.14–2.11 (m, 2H), 1.44 (s, 4.5H), 1.43 (s, 4.5H).  $^{13}\text{C}$  NMR (125 MHz,  $\text{CDCl}_3$ ):  $\delta$  ppm 167.97, 162.39 (d,  $J = 250.0$  Hz), 160.16, 154.94, 154.52, 154.40, 144.59, 138.04, 136.15, 131.24, 131.13, 130.57 (d,  $J = 8.15$  Hz), 128.42, 128.06, 127.88, 124.80, 123.88, 115.23 (d,  $J = 20.6$  Hz), 115.12 (d,  $J = 21.4$  Hz), 79.30, 75.55, 74.69, 67.39, 60.21, 51.84, 51.23, 44.24, 43.80, 31.82, 30.72, 28.36.

***tert*-Butyl (S)-3-((3-(4-fluorophenyl)-5-(piperazine-1-carbonyl) pyridin-2-yl) oxy) pyrrolidine-1-carboxylate (42).** To a solution of **41** (0.119 g, 0.197 mmol) in MeOH (20 mL) under argon was added 10% Pd on activated carbon (0.0132 g). The argon was evacuated and exchanged with  $\text{H}_2$  gas three times, and the reaction was allowed to stir under  $\text{H}_2$  for 3 h. The reaction mixture was filtered through celite, and the solvent removed under reduced pressure to yield **42** (0.0994 g, quantitative yield) as off-white solid.  $^1\text{H}$  NMR (500 MHz,  $\text{CD}_3\text{OD}$ ):  $\delta$  ppm 8.24 (s, 1H), 7.79 (s, 1H), 7.56 (dd, 2H,  $J = 5.6, 8.1$  Hz), 7.15 (t, 2H,  $J = 8.6$  Hz), 5.69–5.67 (m, 1H), 3.71–3.35 (m, 8H), 2.88–2.83 (m, 4H), 2.21–2.14 (m, 2H), 1.45 (s, 4H), 1.43 (s, 5H).  $^{13}\text{C}$  NMR (125 MHz,  $\text{CD}_3\text{OD}$ ):  $\delta$  ppm 169.82, 163.06 (d,  $J = 246.50$  Hz), 161.50, 156.53, 156.51, 145.98, 139.30, 133.04, 132.21 (d,  $J = 8.2$  Hz), 126.75, 125.22, 116.19 (d,  $J = 21.9$  Hz), 116.16 (d,  $J = 21.6$  Hz), 81.10, 81.04, 77.01, 76.30, 53.28, 52.81, 46.53, 45.54, 45.11, 44.33, 32.38, 31.66, 28.80.

**Methyl 3-(2-((*tert*-butoxycarbonyl) amino) ethyl)-5-fluorobenzoate (44).** To a solution of **26** (1.52 g, 6.52 mmol) in dry DMPU (22 mL) was added  $\text{NiI}_2$  (0.176 g, 0.563 mmol), 4,4'-dimethoxy-2,2'-bipyridine (0.125 g, 0.578 mmol), NaI (0.212 g, 1.41 mmol), pyridine (0.06 mL, 0.7 mmol), *tert*-butyl (2-bromoethyl) carbamate (2.49 g, 11.1 mmol), and zinc (0.734 g, 11.2 mmol). The reaction mixture was stirred and heated to 60 °C for 6 h, then allowed to cool. The

reaction mixture was purified directly by column chromatography (silica gel, hexane: EtOAc = 4:1) to afford **44** (0.844 g, 44% yield) as white solid.  $^1\text{H}$  NMR (300 MHz,  $\text{CDCl}_3$ ):  $\delta$  ppm 7.66 (t, 1H,  $J = 1.4$  Hz), 7.56 (ddd, 1H,  $J = 1.5, 2.5, 9.0$  Hz), 7.12–7.07 (m, 1H), 4.61 (bs, 1H), 3.91 (s, 3H), 3.38 (q, 2H,  $J = 6.6$  Hz), 2.84 (t, 2H,  $J = 7.0$  Hz), 1.42 (s, 9H).  $^{13}\text{C}$  NMR (75 MHz,  $\text{CDCl}_3$ ):  $\delta$  ppm 165.92 (d,  $J = 3.1$  Hz), 162.54 (d,  $J = 247.1$  Hz), 155.74, 141.88 (d,  $J = 7.2$  Hz), 132.21 (d,  $J = 8.0$  Hz), 125.67 (d,  $J = 2.7$  Hz), 120.33 (d,  $J = 21.23$  Hz), 114.52 (d,  $J = 23.2$  Hz), 79.46, 52.35, 41.41, 35.86, 28.31.

**3-(2-((*tert*-Butoxycarbonyl) amino) ethyl)-5-fluorobenzoic acid (45).** To a solution of **44** (0.144 g, 0.484 mmol) in MeOH (10 mL) was added 6 M NaOH (10 mL) and the reaction stirred at room temperature for 6 h. MeOH was then removed under reduced pressure. The remaining aqueous solution was acidified with 12 M HCl to pH = 2. The product was then extracted with  $\text{CH}_2\text{Cl}_2$  (50 mL) and the organics washed with water ( $2 \times 50$  mL), brine (50 mL), dried over  $\text{MgSO}_4$ , solids filtered, and solvent removed under reduced pressure to yield **45** (0.118 g, 86% yield) as white solid.  $^1\text{H}$  NMR (500 MHz,  $\text{CD}_3\text{OD}$ ):  $\delta$  ppm 7.71 (s, 1H), 7.52 (d, 1H,  $J = 9.0$  Hz), 7.21 (d, 1H,  $J = 9.2$  Hz), 3.39 (t, 2H,  $J = 7.0$  Hz), 2.83 (t, 2H,  $J = 7.0$  Hz), 1.39 (s, 9H).  $^{13}\text{C}$  NMR (125 MHz,  $\text{CD}_3\text{OD}$ ):  $\delta$  ppm 168.54 (d,  $J = 2.5$  Hz), 163.99 (d,  $J = 245.2$  Hz), 158.42, 144.04 (d,  $J = 7.5$  Hz), 134.22 (d,  $J = 8.1$  Hz), 127.31 (d,  $J = 2.4$  Hz), 121.27 (d,  $J = 21.5$  Hz), 115.12 (d,  $J = 23.2$  Hz), 80.08, 42.45, 36.75, 28.76.

***tert*-Butyl (S)-4-(3-(4-(6-((1-(*tert*-butoxycarbonyl) pyrrolidin-3-yl) oxy)-5-(4-fluorophenyl) nicotinoyl) piperazine-1-carbonyl)-5-fluorophenyl) piperazine-1-carboxylate (43a)** The synthesis of compound **43a** followed the same procedure as for compound **36** (except solvent anhydrous  $\text{CH}_2\text{Cl}_2$  was replaced by anhydrous THF). Column chromatography (silica gel,  $\text{CH}_2\text{Cl}_2$ :MeOH = 99:1) afforded white solid (0.0497 g, 46% yield).  $^1\text{H}$  NMR (300 MHz,  $\text{CDCl}_3$ ):  $\delta$  ppm 8.20 (d, 1H,  $J = 2.6$  Hz), 7.69 (s, 1H), 7.45 (d, 2H,  $J = 5.5$  Hz), 7.08 (t, 2H,  $J = 8.4$  Hz), 6.68 (s, 1H), 6.60 (td, 1H,  $J = 2.1, 12.1$  Hz), 6.51 (d, 1H,  $J = 7.8$  Hz), 5.62–5.60 (m, 1H), 3.77–3.33 (m, 16H), 3.16 (t, 4H,  $J = 5.0$  Hz), 2.17–2.10 (m, 2H), 1.46 (s, 9H), 1.43 (s, 9H).  $^{13}\text{C}$  NMR (125 MHz,  $\text{CDCl}_3$ ):  $\delta$  ppm 169.59 (d, 1H,  $J = 2.0$  Hz), 168.14, 163.38 (d,  $J = 246.2$  Hz), 162.44 (d,  $J = 246.9$  Hz), 160.33, 160.31, 154.61, 154.50, 152.95 (d,  $J = 10.1$  Hz), 144.69, 138.11, 137.29 (d,  $J = 9.1$  Hz), 131.21, 131.10, 130.62 (d,  $J = 8.15$  Hz), 124.57, 124.04, 115.33 (d,  $J = 21.5$  Hz), 115.22 (d,  $J = 21.4$  Hz), 109.73 (d,  $J = 1.5$  Hz), 104.30 (d,  $J = 23.3$  Hz), 103.96 (d,  $J = 25.4$  Hz), 80.12, 79.44, 79.41, 75.66, 74.81, 51.90, 51.85, 48.19, 44.29, 43.85, 31.44, 30.79, 28.42, 28.32.

***tert*-Butyl (S)-3-((5-(4-(3-(2-((*tert*-butoxycarbonyl) amino) ethyl)-5-fluorobenzoyl) piperazine-1-carbonyl)-3-(4-fluorophenyl) pyridin-2-yl) oxy) pyrrolidine-1-carboxylate (43b).** The synthesis of compound **43b** followed the same procedure as for compound **36** (except solvent anhydrous  $\text{CH}_2\text{Cl}_2$  was replaced by anhydrous THF). Column chromatography (silica gel, hexanes:EtOAc = 1:4) afforded white solid (0.0877 g, 57% yield).  $^1\text{H}$  NMR (500 MHz,  $\text{CDCl}_3$ ):  $\delta$  ppm 8.21 (s, 1H), 7.70 (s, 1H), 7.46 (dd, 2H,  $J = 5.5, 7.8$  Hz), 7.09 (t, 2H,  $J = 8.3$  Hz), 7.03 (s, 1H), 6.97 (d, 2H,  $J = 8.3$  Hz), 5.65–5.62 (m, 1H), 4.60 (bs, 1H), 3.80–3.40 (m, 14H), 2.81 (t, 2H,  $J = 6.9$  Hz), 2.15–2.12 (m, 2H), 1.44 (s, 9H), 1.40 (s, 9H).  $^{13}\text{C}$  NMR (125 MHz,  $\text{CDCl}_3$ ):  $\delta$  ppm 169.12, 168.16, 162.56 (d,  $J = 249.0$  Hz), 162.51 (d,  $J = 247.1$  Hz), 160.38, 155.73, 154.63, 144.75, 142.57 (d,  $J = 7.7$  Hz), 138.15, 137.08 (d,  $J = 6.6$  Hz), 130.66 (d,  $J = 8.2$  Hz), 124.62, 124.08, 123.03 (d,  $J = 1.5$  Hz), 117.51 (d,  $J = 20.8$  Hz), 115.37, 115.35 (d,  $J = 22.1$  Hz), 112.31 (d,  $J = 22.9$  Hz), 79.43, 75.70, 74.86, 51.94, 51.63, 47.47, 44.33, 44.32, 42.42, 41.29, 36.00, 31.48, 30.85, 28.46, 28.32.

**(S)-(4-(3-Fluoro-5-(piperazin-1-yl) benzoyl) piperazin-1-yl) (5-(4-fluorophenyl)-6-(pyrrolidin-3-yloxy) pyridin-3-yl) methanone hydrochloride (4).** The synthesis of compound **4** followed the same procedure as for compound **3** to afford white solid (0.0431 g, quantitative yield). <sup>1</sup>H NMR (500 MHz, d<sup>6</sup>-DMSO): δ ppm 9.17 (brs, 2H), 8.94 (brs, 2H), 8.26 (s, 1H), 7.84 (s, 1H), 7.73 – 7.70 (m, 2H), 7.29 – 7.25 (m, 2H), 6.91 (d, 1H, *J* = 13.0 Hz), 6.81 (s, 1H), 6.66 (d, 1H, *J* = 8.5 Hz), 5.65 – 5.63 (m, 1H), 3.70 – 3.18 (m, 20H), 2.26 – 2.21 (m, 1H), 2.15 – 2.10 (m, 1H); <sup>13</sup>C NMR (125 MHz, CD<sub>3</sub>OD) δ ppm 170.23, 168.81, 163.80 (d, *J* = 244.4 Hz), 162.89 (d, *J* = 245.1 Hz), 159.92, 152.42, 152.34, 144.85, 138.55, 138.04, 137.97, 131.59, 131.28, 125.86, 124.11, 115.18 (d, *J* = 21.3 Hz), 110.21, 105.16 (d, *J* = 23.5 Hz), 104.38 (d, *J* = 25.8 Hz), 74.99, 50.97, 48.39–47.37 (m, 4C), 45.55, 44.59, 43.28, 30.92. HRMS (ESI) *m/z* calculated for C<sub>31</sub>H<sub>34</sub>F<sub>2</sub>N<sub>6</sub>O<sub>3</sub> (M+H)<sup>+</sup> = 577.2733, found 577.2741.

**(S)-(4-(3-(2-Aminoethyl)-5-fluorobenzoyl) piperazin-1-yl) (5-(4-fluorophenyl)-6-(pyrrolidin-3-yloxy) pyridin-3-yl) methanone hydrochloride (5).** The synthesis of compound **5** followed the same procedure as for compound **3** to afford white solid (0.0667 g, 92% yield). <sup>1</sup>H NMR (500 MHz, d<sup>6</sup>-DMSO) δ ppm 9.51 (brs, 3H), 8.27 (s, 1H), 8.08 (brs, 2H), 7.84 (s, 1H), 7.74 – 7.71 (m, 2H), 7.27 – 7.24 (m, 3H), 7.16 – 7.13 (m, 2H), 7.20–7.16 (m, 1H), 5.74–5.78 (m, 1H), 3.68 – 3.16 (m, 12H), 3.06 (t, 2H, *J* = 7.0 Hz), 2.93 (t, 2H, *J* = 7.0 Hz), 2.24 – 2.18 (m, 1H), 2.13 – 2.10 (m, 1H); <sup>13</sup>C NMR (125 MHz, D<sub>2</sub>O) δ ppm 171.04, 169.68, 163.61, 161.65, 159.82, 144.55, 140.63, 140.57, 138.75, 136.56, 131.32, 131.27, 131.06, 124.98, 124.47, 123.31, 118.05 (d, *J* = 21.3 Hz), 115.62 (d, *J* = 22.0 Hz), 112.96 (d, *J* = 24.4 Hz), 75.21, 50.91, 47.78, 47.14, 44.58, 42.76, 42.13, 40.25, 32.58, 30.74. HRMS (ESI) *m/z* calculated for C<sub>29</sub>H<sub>31</sub>F<sub>2</sub>N<sub>5</sub>O<sub>3</sub> (M + H)<sup>+</sup> = 536.2468, found 536.2470.

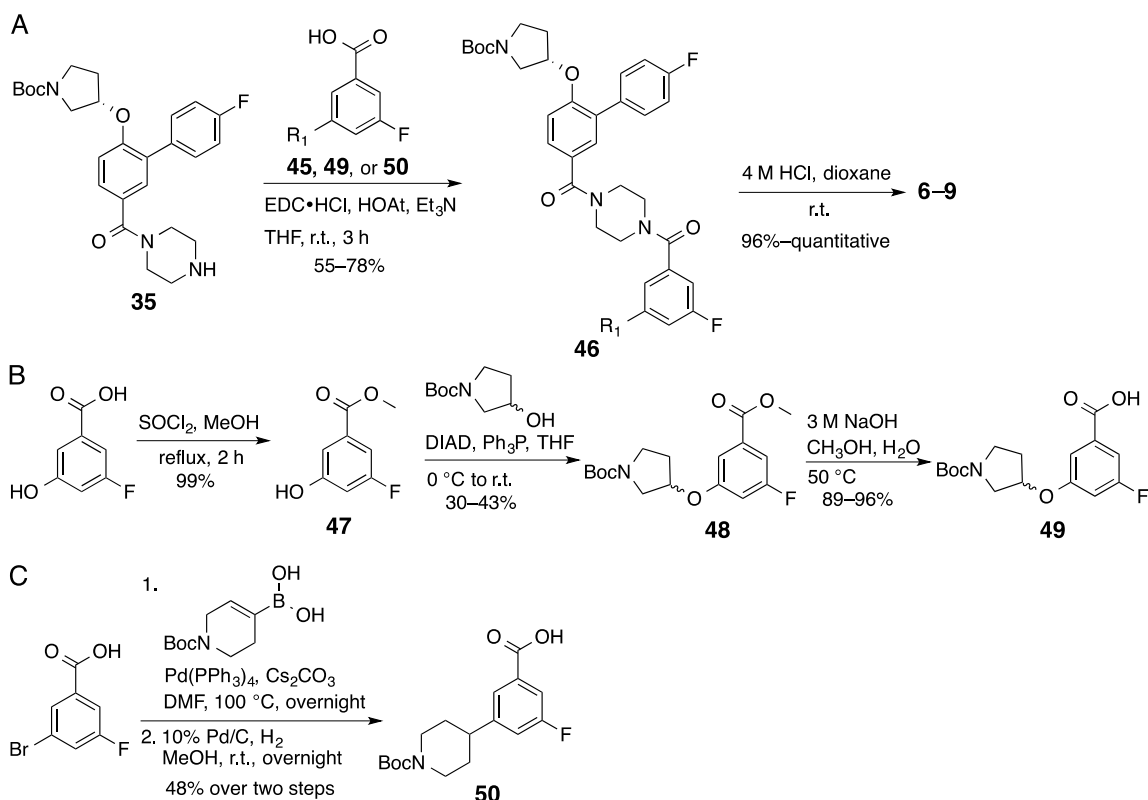



**Methyl 3-fluoro-5-hydroxybenzoate (47).** The synthesis of compound **47** followed the same procedure as for compound **26** to afford brown liquid (2.35 g, 99% yield). <sup>1</sup>H NMR (500 MHz, CD<sub>3</sub>OD): δ ppm 7.23 (s, 1H), 7.13 (ddd, 1H, *J* = 1.3, 2.1, 9.1 Hz), 6.73 (td, 1H, *J* = 2.3, 10.4 Hz), 3.39 (s, 3H). <sup>13</sup>C NMR (125 MHz, CD<sub>3</sub>OD): δ ppm 167.43 (d, *J* = 3.7 Hz), 164.76 (d, *J* = 243.9 Hz), 160.57 (d, *J* = 11.5 Hz), 133.88 (d, *J* = 9.9 Hz), 113.48 (d, *J* = 2.7 Hz), 108.22 (d, *J* = 24.3 Hz), 107.92 (d, *J* = 24.0 Hz), 52.87.

***tert*-Butyl (S)-3-(3-fluoro-5-(methoxycarbonyl) phenoxy) pyrrolidine-1-carboxylate (48a).** The synthesis of compound **48a** followed the same procedure as for compound **23**. Column chromatography (silica gel, hexanes:EtOAc = 95:5) afforded white solid (0.141 g, 30%). <sup>1</sup>H NMR (500 MHz, CDCl<sub>3</sub>): δ ppm 7.32–7.30 (m, 2H), 6.76 (td, 1H, *J* = 2.3, 10.0 Hz), 4.92–4.89 (m, 1H), 3.890 (s, 3H), 3.61–3.45 (m, 4H), 2.18–2.12 (m, 2H), 1.45 (s, 9H). <sup>13</sup>C NMR (125 MHz, CDCl<sub>3</sub>): 165.66 (d, *J* = 3.6 Hz), 163.17 (d, *J* = 246.8 Hz), 158.31 (d, *J* = 11.0 Hz), 154.36, 132.73 (d, *J* = 9.5 Hz), 111.71 (d, *J* = 2.8 Hz), 109.30 (d, *J* = 23.6 Hz), 108.05 (d, *J* = 24.5 Hz), 79.54, 76.27, 52.39, 51.43, 51.21, 43.91, 43.63, 31.33, 30.61, 28.43.

***tert*-Butyl (R)-3-(3-fluoro-5-(methoxycarbonyl) phenoxy) pyrrolidine-1-carboxylate (48b).** The synthesis of compound **48b** followed the same procedure as for compound **23**. Column chromatography (silica gel, hexanes:EtOAc = 95:5) afforded yellow oil (0.254 g, 43% yield). <sup>1</sup>H NMR (500 MHz, CDCl<sub>3</sub>): δ ppm 7.25–7.22 (m, 2H), 6.71 (d, 1H, *J* = 10.0 Hz), 4.87–4.84 (m, 1H), 3.83 (s, 3H), 3.57–3.39 (m, 4H), 2.11–2.03 (m, 2H), 1.45 (s, 9H). <sup>13</sup>C NMR (125 MHz, CDCl<sub>3</sub>): δ ppm 165.45 (d, *J* = 3.4 Hz), 162.98 (d, *J* = 246.7 Hz), 158.15 (d, *J* = 10.9 Hz), 154.24, 154.15, 132.50 (d, *J* = 9.4 Hz), 111.57, 109.06 (d, *J* = 23.1 Hz), 107.83 (d, *J* = 24.8 Hz), 79.35, 79.32, 76.93, 76.07, 52.39, 51.31, 50.99, 43.78, 43.45, 31.16, 30.39, 28.25.

**(S)-3-((1-*tert*-Butoxycarbonyl) pyrrolidin-3-yl) oxy)-5-fluorobenzoic acid (49a).** The synthesis of compound **49a** followed the same procedure as for compound **28** to afford white solid (0.125 g, 96% yield). <sup>1</sup>H NMR (500 MHz, CDCl<sub>3</sub>): δ ppm 11.33 (brs, 1H), 7.40–7.36 (m, 2H), 6.81 (d, 1H, *J* = 4.5 Hz), 4.94–4.92 (m, 1H), 3.68–3.48 (m, 4H), 2.17–2.12 (m, 2H), 1.47 (s, 9H). <sup>13</sup>C NMR (125 MHz, CDCl<sub>3</sub>): δ ppm 169.50, 163.46 (d, *J* = 242.4 Hz), 158.35 (d, *J* = 10.9 Hz), 154.79, 154.67, 132.33 (d, *J* = 9.2 Hz), 112.07, 109.86 (d, *J* = 24.3 Hz), 108.73 (d, *J* = 24.9 Hz), 80.05, 77.10, 76.29, 51.55, 51.21, 44.05, 43.69, 31.36, 30.60, 28.70.

**(R)-3-((1-*tert*-Butoxycarbonyl) pyrrolidin-3-yl) oxy)-5-fluorobenzoic acid (49b).** The synthesis of compound **49b** followed the same procedure as for compound **28** to afford white solid (0.419 g, 89% yield). <sup>1</sup>H NMR (300 MHz, CD<sub>3</sub>OD): δ ppm 7.37 (s, 1H), 7.30 (d, 1H, *J* = 8.0 Hz), 6.96 (td, 1H, *J* = 2.4, 10.4 Hz), 5.07–5.04 (m, 1H), 3.66–3.43 (m, 4H), 2.19–2.17 (m, 2H), 1.46 (d, 9H, *J* = 4.1 Hz). <sup>13</sup>C NMR (125 MHz, CD<sub>3</sub>OD): δ ppm 168.10 (d, *J* = 3.4 Hz), 164.70 (d, *J* = 245.3 Hz), 159.93 (d, *J* = 11.0 Hz), 156.44, 156.36, 135.01 (d, *J* = 9.3 Hz), 113.48 (d, *J* = 2.6 Hz), 110.01 (d, *J* = 23.2 Hz), 108.62 (d, *J* = 24.6 Hz), 81.18, 81.16, 78.51, 77.73, 52.74, 52.36, 45.29, 44.86, 32.12, 31.39, 28.78.

**3-(1-*tert*-Butoxycarbonyl) piperidin-4-yl)-5-fluorobenzoic acid (50).** To a solution of 3-bromo-5-fluorobenzoic acid (0.410 g, 1.87 mmol), in dry DMF (40 mL) under anhydrous conditions was added *tert*-butyl 4-(4,4,5,5-tetramethyl-1,3,2-dioxaborolan-2-yl)-3,6-dihydropyridine-1(2*H*)-carboxylate (0.878 g, 2.84 mmol), Pd(PPh<sub>3</sub>)<sub>4</sub> (0.325 g, 0.281 mmol), and K<sub>2</sub>CO<sub>3</sub> (0.785 g, 5.68 mmol). The mixture was heated to 100 °C under argon and stirred for 20 h. The solvent was then removed under reduced pressure, and the residue was taken into EtOAc (100 mL). The organic solution was washed with water (2 × 50 mL) and brine (50 mL), dried over MgSO<sub>4</sub>, solids filtered, and solvent removed under reduced pressure. The residue was purified by column chromatography (silica gel, hexanes:EtOAc:acetic acid = 9:1:0.25) to yield

white solid (0.419 g, 1.30 mmol). A portion of this solid (0.0845 g, 0.262 mmol) was dissolved in MeOH (20 mL). The air was evacuated and exchanged with argon three times and 10% Pd on activated carbon (0.017 g) was added. The argon was evacuated and exchanged with the H<sub>2</sub> gas three times and the reaction was allowed to stir under H<sub>2</sub> for 12 h. The mixture was filtered through celite and the solvent removed under reduced pressure to yield **50** (0.0584 g, 48% overall yield) as off-white solid. <sup>1</sup>H NMR (500 MHz, CD<sub>3</sub>OD): δ ppm 7.72–7.70 (m, 1H), 7.52 (ddd, 1H, *J* = 1.4, 2.4, 9.0 Hz), 7.24 (td, 1H, *J* = 2.0, 9.7 Hz), 4.21 (m, 2H), 2.87–2.78 (m, 3H), 1.84 (m, 2H), 1.58 (dq, 2H, *J* = 4.3, 12.7 Hz), 1.47 (s, 9H). <sup>13</sup>C NMR (125 MHz, CD<sub>3</sub>OD): δ ppm 168.51 (d, *J* = 3.1 Hz), 164.14 (d, *J* = 245.3 Hz), 156.51, 150.42 (d, *J* = 6.9 Hz), 134.43 (d, *J* = 7.8 Hz), 125.1 (d, *J* = 2.6 Hz), 119.28 (d, *J* = 21.8 Hz), 115.19 (d, *J* = 23.2 Hz), 81.14, 43.35, 43.34, 34.04, 28.76.

**tert-Butyl (S)-3-((5-(4-(3-(2-((tert-butoxycarbonyl) amino) ethyl)-5-fluorobenzoyl) piperazine-1-carbonyl)-4'-fluoro-[1,1'-biphenyl]-2-yl) oxy) pyrrolidine-1-carboxylate (46a).**

The synthesis of compound **46a** followed the same procedure as for compound **36**. Column chromatography (silica gel, 100% EtOAc) afforded white solid (0.0752 g, 55% yield). <sup>1</sup>H NMR (500 MHz, CDCl<sub>3</sub>): δ ppm 7.41–7.38 (m, 4H), 7.07 (t, 2H, *J* = 7.7 Hz), 7.02 (s, 1H), 6.98–6.94 (m, 3H), 4.91–4.89 (m, 1H), 4.58 (bs, 1H), 3.78–3.20 (m, 14H), 2.81 (t, 2H, *J* = 6.5 Hz), 2.11–2.07 (m, 2H), 1.44 (s, 9H), 1.41 (s, 9H). <sup>13</sup>C NMR (125 MHz, CDCl<sub>3</sub>): δ ppm 172.91, 171.03 (d, *J* = 2.1 Hz), 170.12, 169.04, 163.45, 162.46 (d, *J* = 248.9 Hz), 162.05 (d, *J* = 247.5 Hz), 155.72, 155.22, 155.10, 154.44, 154.26, 142.50 (d, *J* = 7.5 Hz), 137.09 (d, *J* = 6.9 Hz), 133.00 (d, *J* = 11.7 Hz), 131.8, 131.00, 130.89, 130.83, 130.27, 127.92, 122.94, 117.35 (d, *J* = 21.03 Hz), 114.96 (d, *J* = 21.7 Hz), 114.83 (d, *J* = 21.3 Hz), 113.77, 113.47, 112.27 (d, *J* = 23.1 Hz), 79.53, 79.46, 79.31, 77.14, 76.28, 60.27, 51.35, 50.84, 44.00, 43.63, 41.21, 35.87, 31.41, 30.63, 28.36, 28.24.

**tert-Butyl (S)-3-(3-(4-(6-(((S)-1-(tert-butoxycarbonyl) pyrrolidin-3-yl) oxy)-4'-fluoro-[1,1'-biphenyl]-3-carbonyl) piperazine-1-carbonyl)-5-fluorophenoxy) pyrrolidine-1-carboxylate (46b).**

The synthesis of compound **46b** followed the same procedure as for compound **36**. Column chromatography (silica gel, CH<sub>2</sub>Cl<sub>2</sub>:MeOH = 99:1) afforded white solid (0.0656 g, 61% yield). <sup>1</sup>H NMR (300 MHz, CDCl<sub>3</sub>): δ ppm 7.41–7.36 (m, 4H), 7.05 (t, 2H, *J* = 8.2 Hz), 6.94 (d, 1H, *J* = 8.5 Hz), 6.69–6.67 (m, 2H), 6.62 (d, 1H, *J* = 10.8 Hz), 4.91–4.89 (m, 1H), 4.86–4.83 (m, 1H), 3.74–3.21 (m, 16H), 2.14–2.05 (m, 4H), 1.44 (s, 18H). <sup>13</sup>C NMR (125 MHz, CD<sub>3</sub>OD): δ ppm 172.34, 170.89 (*J* = 2.8 Hz), 164.88 (d, *J* = 246.8 Hz), 163.60 (d, *J* = 245.6 Hz), 160.30 (d, *J* = 11.1 Hz), 156.72, 156.42, 156.41, 156.36, 156.29, 139.36 (d, *J* = 9.2 Hz), 134.91, 132.68, 132.45, 132.39, 132.33, 131.40 (d, *J* = 6.8 Hz), 129.44, 129.30 (d, *J* = 15.8 Hz), 115.91 (d, *J* = 21.6 Hz), 115.86 (d, *J* = 21.6 Hz), 115.54, 115.14, 111.26, 107.62 (d, *J* = 23.7 Hz), 105.61 (d, *J* = 25.1 Hz), 81.14, 81.03, 78.59, 78.52, 78.04, 77.76, 54.87, 52.76, 52.72, 52.36, 52.20, 45.34, 45.29, 44.97, 44.88, 32.22, 32.14, 31.49, 31.39, 28.80.

**tert-Butyl (R)-3-(3-(4-(6-(((S)-1-(tert-butoxycarbonyl) pyrrolidin-3-yl) oxy)-4'-fluoro-[1,1'-biphenyl]-3-carbonyl) piperazine-1-carbonyl)-5-fluorophenoxy) pyrrolidine-1-carboxylate (46c).**

The synthesis of compound **46c** followed the same procedure as for compound **36**. Column chromatography (silica gel, CH<sub>2</sub>Cl<sub>2</sub>:MeOH = 99:1) afforded white solid (0.0788 g, 78% yield). <sup>1</sup>H NMR (500 MHz, CDCl<sub>3</sub>): δ ppm 7.39–7.36 (m, 4H), 7.06–7.02 (m, 2H), 6.94–6.93 (m, 1H), 6.69–6.67 (m, 2H), 6.62 (d, 1H, *J* = 10.0 Hz), 4.90–4.88 (m, 1H), 4.85–4.83 (m, 1H), 3.74–3.21 (m, 16H), 2.14–2.02 (m, 4H), 1.44 (s, 18H). <sup>13</sup>C NMR (125 MHz, CDCl<sub>3</sub>): δ ppm 174.10, 171.05, 170.19, 168.84 (d, *J* = 2.4 Hz), 163.19 (d, *J* = 249.2 Hz), 162.07 (d, *J* = 247.0 Hz), 158.70 (d, *J* = 10.7 Hz), 155.25, 155.13, 154.48, 154.42, 154.29, 137.63 (d, *J* = 10.7 Hz),

132.99 (d,  $J = 10.7$  Hz), 131.21, 131.03, 130.83, 130.27, 127.94, 114.97 (d,  $J = 21.0$  Hz), 114.84 (d,  $J = 21.3$  Hz), 113.47, 110.00, 106.59 (d,  $J = 23.2$  Hz), 104.39 (d,  $J = 24.29$  Hz), 79.60, 79.52, 77.20, 77.15, 76.29, 76.17, 60.29, 51.42, 51.37, 51.06, 50.84, 44.02, 43.90, 43.65, 43.54, 31.42, 31.29, 30.64, 30.52, 28.38.

***tert*-Butyl (S)-4-(3-(4-(6-((1-*tert*-butoxycarbonyl) pyrrolidin-3-yl) oxy)-4'-fluoro-[1,1'-biphenyl]-3-carbonyl) piperazine-1-carbonyl)-5-fluorophenyl) piperidine-1-carboxylate (46d).** The synthesis of compound **46d** followed the same procedure as for compound **36**. Column chromatography (silica gel, CH<sub>2</sub>Cl<sub>2</sub>:MeOH = 99:1) afforded white solid (0.0848 g, 71% yield). <sup>1</sup>H NMR (500 MHz, CDCl<sub>3</sub>):  $\delta$  ppm 7.39–7.36 (m, 4H), 7.08–7.04 (m, 2H), 7.02 (s, 1H), 6.97–6.93 (m, 3H), 4.91–4.88 (m, 1H), 4.27–4.17 (m, 2H), 3.76–3.21 (m, 12H), 2.79–2.76 (m, 2H), 2.65 (t, 1H,  $J = 12.1$  Hz), 2.09–2.04 (m, 2H), 1.81–1.79 (m, 2H), 1.58–1.52 (m, 2H), 1.46 (s, 9H), 1.43 (s, 4.5H), 1.42 (s, 4.5H). <sup>13</sup>C NMR (125 MHz, CDCl<sub>3</sub>):  $\delta$  ppm 170.17, 169.19, 162.56 (d,  $J = 248.4$  Hz), 162.09 (d,  $J = 244.5$  Hz), 155.26, 155.12, 154.62, 154.47, 154.27, 149.26 (d,  $J = 7.3$  Hz), 137.07 (d,  $J = 6.9$  Hz), 133.07, 132.96, 131.23, 132.05, 130.90, 130.84, 130.30, 127.95 (d,  $J = 5.3$  Hz), 121.14, 115.39 (d,  $J = 22.3$  Hz), 114.86 (d,  $J = 21.1$  Hz), 113.76, 113.49, 112.07 (d,  $J = 22.9$  Hz) 79.56, 79.49, 77.20, 76.27, 60.29, 51.37, 50.83, 44.03, 43.65, 42.34, 32.81, 31.46, 30.83, 30.67, 29.60, 28.37.

**(S)-4-(3-(2-Aminoethyl)-5-fluorobenzoyl) piperazin-1-yl) (4'-fluoro-6-(pyrrolidin-3-yloxy)-[1,1'-biphenyl]-3-yl) methanone hydrochloride (6).** The synthesis of compound **6** followed the same procedure as for compound **3** to afford white solid (0.0593 g, 96% yield). <sup>1</sup>H NMR (500 MHz, d<sup>6</sup>-DMSO):  $\delta$  ppm 9.47 (brs, 2H), 8.03 (brs, 2H), 7.60 (d, 1H,  $J = 8.0$  Hz), 7.59 (d, 1H,  $J = 8.0$  Hz), 7.43 (d, 1H,  $J = 8.5$  Hz), 7.37 (s, 1H), 7.26 – 7.15 (m, 6H), 5.18 – 5.13 (m, 1H), 3.65 – 3.26 (m, 12H), 3.07 (t, 2H,  $J = 7.2$  Hz), 2.92 (t, 2H,  $J = 7.4$  Hz), 2.17 – 2.12 (m, 2H), 2.06 – 2.02 (m, 2H); <sup>13</sup>C NMR (125 MHz, CD<sub>3</sub>OD):  $\delta$  ppm 171.04, 169.77, 162.97 (d,  $J = 245.9$  Hz), 162.56 (d,  $J = 244.3$  Hz), 155.08, 140.71 (d,  $J = 7.5$  Hz), 137.90 (d,  $J = 6.9$  Hz), 133.59, 133.56, 131.43, 131.37, 131.28, 130.49, 128.73, 128.40, 123.45 (d,  $J = 2.4$  Hz), 117.43 (d,  $J = 22.0$  Hz), 114.96 (d,  $J = 21.3$  Hz), 114.15, 112.92 (d,  $J = 22.8$  Hz), 76.87, 50.63, 48.38 – 47.36 (m, 4C), 44.44, 40.28, 32.82, 30.97. HRMS (ESI)  $m/z$  calculated for C<sub>30</sub>H<sub>32</sub>F<sub>2</sub>N<sub>4</sub>O<sub>3</sub> (M+H)<sup>+</sup> = 535.2515, found 535.2522.

**(4-(3-Fluoro-5-(((S)-pyrrolidin-3-yl) oxy) benzoyl) piperazin-1-yl) (4'-fluoro-6-(((S)-pyrrolidin-3-yl) oxy)-[1,1'-biphenyl]-3-yl) methanone hydrochloride (7).** The synthesis of compound **7** followed the same procedure as for compound **3** to afford white solid (0.0531 g, 97% yield). <sup>1</sup>H NMR (500 MHz, d<sup>6</sup>-DMSO):  $\delta$  ppm 9.20 (brs, 4H), 7.61 – 7.57 (m, 2H), 7.43 (d, 1H,  $J = 8.5$  Hz), 7.37 (s, 1H), 7.23 (t, 2H,  $J = 9.0$  Hz), 7.19 (d, 1H,  $J = 8.5$  Hz), 6.97 (d, 1H,  $J = 10.5$  Hz), 6.89 (d, 1H,  $J = 8.5$  Hz), 6.83 (s, 1H), 5.20 – 5.14 (m, 2H), 3.66 – 3.06 (m, 16H), 2.23 – 2.02 (m, 4H). <sup>13</sup>C NMR (125 MHz, CD<sub>3</sub>OD):  $\delta$  ppm 171.01, 169.54, 163.64 (d,  $J = 245.9$  Hz), 162.54 (d,  $J = 244.3$  Hz), 158.37, 158.28, 155.08, 138.38, 138.32, 133.58, 131.46, 131.32 (d,  $J = 19$  Hz), 130.50, 128.69, 128.42, 114.97 (d,  $J = 22.0$  Hz), 114.14, 110.37, 107.18 (d,  $J = 23.5$  Hz), 104.87 (d,  $J = 25.9$  Hz), 76.86, 76.54, 50.71, 50.62, 48.40–47.38 (m, 4C), 44.45, 44.10, 31.00, 30.50. HRMS (ESI)  $m/z$  calculated for C<sub>32</sub>H<sub>34</sub>F<sub>2</sub>N<sub>4</sub>O<sub>4</sub> (M+H)<sup>+</sup> = 577.2621, found 577.2626.

**(4-(3-Fluoro-5-(((R)-pyrrolidin-3-yl) oxy) benzoyl) piperazin-1-yl) (4'-fluoro-6-(((S)-pyrrolidin-3-yl) oxy)-[1,1'-biphenyl]-3-yl) methanone hydrochloride (8).** The synthesis of compound **8** followed the same procedure as for compound **3** to afford white solid (0.0682 g, quantitative yield). <sup>1</sup>H NMR (500 MHz, d<sup>6</sup>-DMSO):  $\delta$  ppm 9.43 (brs, 4H), 7.61 – 7.58 (m, 2H), 7.43 (d, 1H,  $J = 8.5$  Hz), 7.37 (s, 1H), 7.23 (t, 2H,  $J = 9.0$  Hz), 7.19 (d, 1H,  $J = 8.5$  Hz), 6.98 (d,

1H,  $J = 10.5$  Hz), 6.89 (d, 1H,  $J = 8.5$  Hz), 6.83 (s, 1H), 5.21 – 5.14 (m, 2H), 3.69 – 3.08 (m, 16H), 2.23 – 2.02 (m, 4H).  $^{13}\text{C}$  NMR (125 MHz,  $\text{CD}_3\text{OD}$ ):  $\delta$  ppm 171.00, 169.53, 163.64 (d,  $J = 245.9$  Hz), 162.54 (d,  $J = 244.4$  Hz), 158.37, 158.28, 155.07, 138.40, 138.32, 133.56, 131.45, 131.31 (d,  $J = 20.5$  Hz), 130.48, 128.71, 128.40, 114.97 (d,  $J = 22.0$  Hz), 114.12, 110.35, 107.16 (d,  $J = 22.8$  Hz), 104.86 (d,  $J = 24.4$  Hz), 76.85, 76.52, 51.68, 50.69, 48.41-47.39 (m, 4C), 44.44, 44.08, 30.98, 30.49. HRMS (ESI)  $m/z$  calculated for  $\text{C}_{32}\text{H}_{34}\text{F}_2\text{N}_4\text{O}_4$  ( $\text{M}+\text{H}$ ) $^+ = 577.2621$ , found 577.2636.

**(S)-(4-(3-Fluoro-5-(piperidin-4-yl) benzoyl) piperazin-1-yl) (4'-fluoro-6-(pyrrolidin-3-yloxy)-[1,1'-biphenyl]-3-yl) methanone hydrochloride (9)**. The synthesis of compound **9** followed the same procedure as for compound **3** to afford white solid (0.0685 g, 97% yield).  $^1\text{H}$  NMR (500 MHz,  $d^6$ -DMSO):  $\delta$  ppm 9.44 (brs, 2H), 8.93 (brs, 2H), 7.61–7.58 (m, 2H), 7.43 (d, 1H,  $J = 8.5$  Hz), 7.37 (s, 1H), 7.22 (t, 2H,  $J = 9.0$  Hz), 7.19 (d, 1H,  $J = 8.5$  Hz), 7.17 – 7.14 (m, 2H), 7.11 (s, 1H), 5.17 – 5.13 (m, 1H), 3.66 – 2.83 (m, 16H), 2.19 – 1.80 (m, 6H).  $^{13}\text{C}$  NMR (125 MHz,  $\text{D}_2\text{O}$ ):  $\delta$  ppm 171.87, 171.03, 162.60 (d,  $J = 242.9$  Hz), 162.23 (d,  $J = 243.6$  Hz), 154.74, 148.19, 136.34, 133.02, 131.44, 131.37, 130.00, 128.57, 127.75, 121.34, 115.95, (d,  $J = 22.0$  Hz), 115.36 (d,  $J = 21.3$  Hz), 114.56, 112.32 (d,  $J = 22$  Hz), 76.79, 50.59, 47.82, 47.64, 47.25, 47.05, 44.38, 44.30, 42.60, 42.11, 39.02, 30.51, 29.20. HRMS (ESI)  $m/z$  calculated for  $\text{C}_{33}\text{H}_{36}\text{F}_2\text{N}_4\text{O}_3$  ( $\text{M}+\text{H}$ ) $^+ = 575.2828$ , found 575.2842.

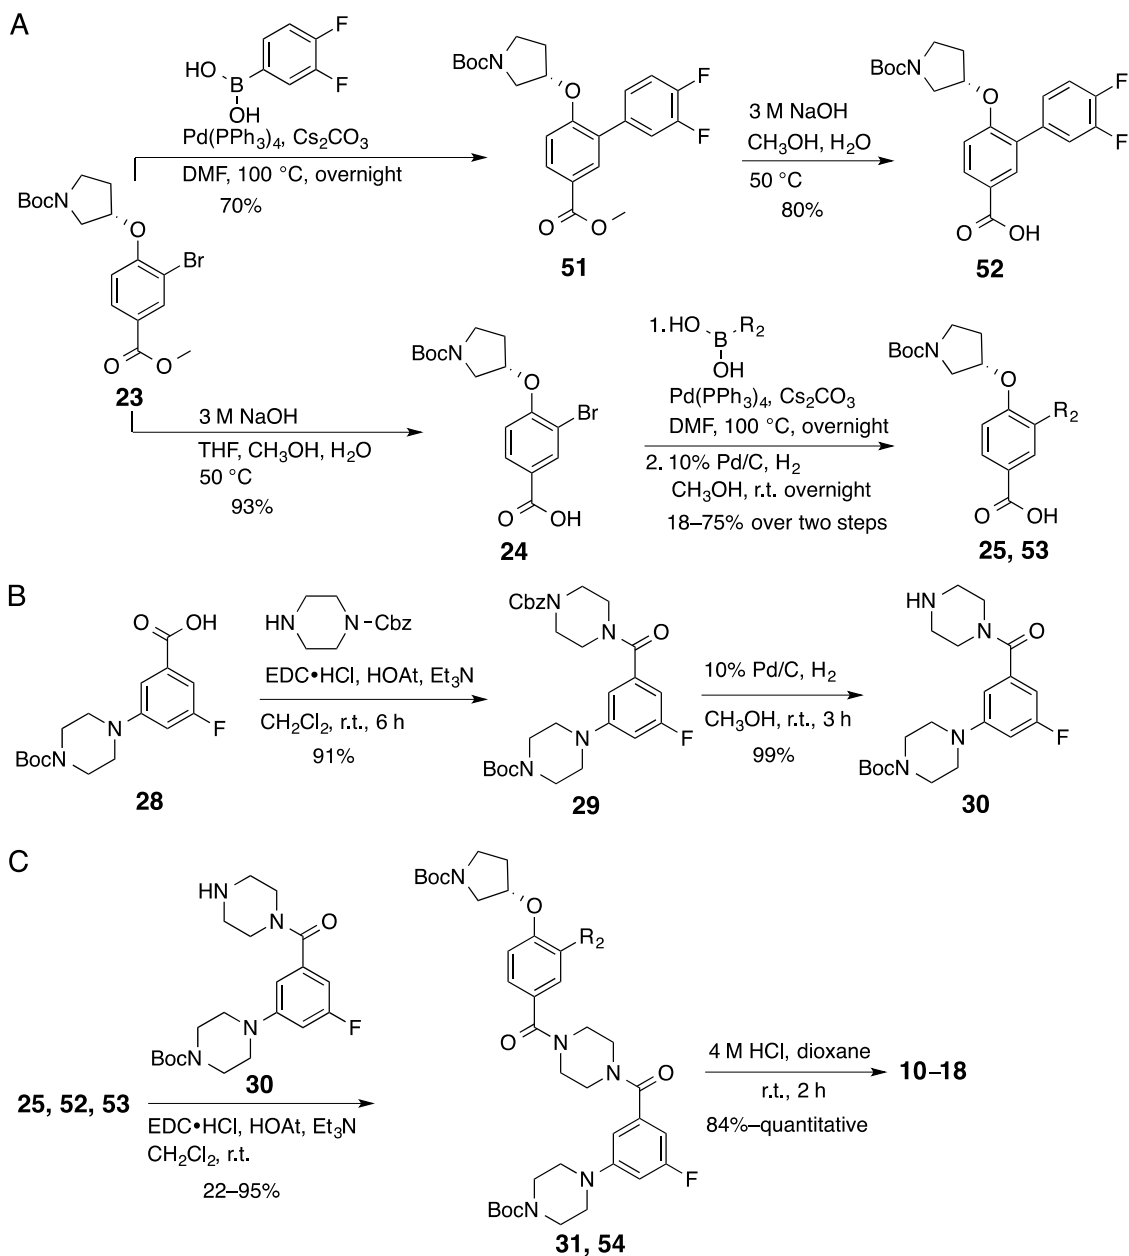

***tert*-Butyl (S)-3-((3',4'-difluoro-5-(methoxycarbonyl)-[1,1'-biphenyl]-2-yl) oxy) pyrrolidine-1-carboxylate (51).** The synthesis of compound **51** followed the same procedure as for compound **32**. Column chromatography (silica gel, hexanes:EtOAc = 5:1) afforded white solid (0.38 g, 70% yield). <sup>1</sup>H NMR (500 MHz, CDCl<sub>3</sub>): δ ppm 7.99 (d, 2H, *J* = 9.0 Hz), 7.29 (d, 1H, *J* = 8.1 Hz), 7.16 (d, 2H, *J* = 3.5 Hz), 6.94 (d, 1H, *J* = 8.4 Hz), 4.98–4.96 (m, 1H), 3.89 (s, 3H), 3.66–3.31 (m, 4H), 2.11–2.09 (m, 2H), 1.44 (s, 9H). <sup>13</sup>C NMR (125 MHz, CDCl<sub>3</sub>): δ ppm 166.57, 157.44, 154.45, 150.84, 148.87, 132.64, 131.12, 129.65, 125.62, 125.59, 125.57, 125.54, 123.47, 118.63, 118.58, 118.56, 118.48, 118.45, 118.42, 117.00, 116.97, 116.89, 116.83, 113.01, 112.81, 79.86, 76.47, 52.18, 51.58, 51.12, 44.22, 43.83, 31.69, 30.88, 30.87, 28.53. MS (ESI) *m/z* = 434.6 [M + H]<sup>+</sup>.

**(S)-6-((1-(tert-Butoxycarbonyl) pyrrolidin-3-yl) oxy)-3',4'-difluoro-[1,1'-biphenyl]-3-carboxylic acid (52).** The synthesis of compound **52** followed the same procedure as for compound **33** to afford white solid (0.51 g, 80%). <sup>1</sup>H NMR (500 MHz, CDCl<sub>3</sub>): δ ppm 8.10–8.02 (m, 2H), 7.31–7.26 (m, 1H), 7.19–7.16 (m, 2H), 6.97 (d, 1H, *J* = 8.7 Hz), 5.03–5.00 (m, 1H), 3.71–3.33 (m, 4H), 2.16–2.12 (m, 2H), 1.46 (s, 9H). <sup>13</sup>C NMR (125 MHz, d<sup>6</sup>-DMSO/CDCl<sub>3</sub>): δ ppm 171.12, 170.88, 158.18, 158.03, 154.96, 154.62, 150.92, 150.90, 148.96, 148.94, 148.93, 148.85, 148.83, 134.23, 133.19, 131.80, 129.74, 129.68, 125.60, 122.73, 118.65, 118.51, 117.00, 116.86, 112.98, 112.81, 80.18, 76.50, 51.63, 51.13, 44.29, 43.87, 31.69, 30.89, 28.55.

**(S)-3-Bromo-4-((1-(tert-butoxycarbonyl) pyrrolidin-3-yl) oxy) benzoic acid (24).** The synthesis of compound **24** followed the same procedure as for compound **33** to afford white solid (0.941 g, 93% yield). <sup>1</sup>H NMR (300 MHz, CDCl<sub>3</sub>): δ ppm 8.29 (d, 1H, *J* = 4.7 Hz), 8.01 (t, 1H, *J* = 8.9 Hz), 6.88 (d, 1H, *J* = 8.6 Hz), 5.03–5.01 (m, 1H), 3.70–3.56 (m, 4H), 2.30–2.13 (m, 2H), 1.47 (s, 9H). <sup>13</sup>C NMR (125 MHz, CDCl<sub>3</sub>): δ ppm 169.84, 157.90, 154.76, 154.49, 135.77, 130.93, 123.49, 113.12, 112.98, 79.94, 78.18, 51.45, 51.07, 44.15, 43.72, 31.67, 30.87, 28.45.

**(S)-4-((1-(tert-Butoxycarbonyl) pyrrolidin-3-yl) oxy)-3-cyclohexylbenzoic acid (25a).** The synthesis of compound **25a** followed the same procedure as for compound **50**. Column chromatography (silica gel, hexanes:acetone:AcOH = 88:10:2) afforded off-white solid (0.173 g, 75% yield). <sup>1</sup>H NMR (500 MHz, CD<sub>3</sub>OD): δ ppm 7.87–7.84 (m, 2H), 6.96 (d, 1H, *J* = 8.0 Hz), 5.10–5.08 (m, 1H), 3.61–3.45 (m, 4H), 2.85 (t, 1H, *J* = 9.8 Hz), 2.20–2.16 (m, 2H), 1.82–1.73 (m, 6H), 1.45 (s, 4.5H), 1.42, (s, 4.5H), 1.38–1.25 (m, 4H). <sup>13</sup>C NMR (125 MHz, CD<sub>3</sub>OD): δ ppm 170.58, 159.11, 156.50, 156.39, 137.98, 137.89, 130.21, 129.73, 125.00, 124.90, 113.13, 113.10, 81.08, 81.04, 77.77, 76.94, 52.76, 52.28, 45.52, 45.12, 38.91, 38.85, 34.32, 34.29, 33.82, 33.72, 32.38, 31.69, 28.82, 28.29, 28.23, 28.19, 28.16, 27.43.

**(S)-4-((1-(tert-Butoxycarbonyl) pyrrolidin-3-yl) oxy)-3-(4-(trifluoromethyl) cyclohexyl) benzoic acid (25b).** The synthesis of compound **25b** followed the same procedure as for compound **50**. Column chromatography (silica gel, hexanes:acetone:AcOH = 88:10:2) afforded white solid (0.0983 g, 41% yield). <sup>1</sup>H NMR (300 MHz, CD<sub>3</sub>OD): δ ppm 7.89–7.86 (m, 2H), 7.01–6.97 (m, 1H), 5.13–5.10 (m, 1H), 3.59–3.42 (m, 4H), 2.98–2.81 (m, 1H), 2.44–2.36 (m, 1H), 2.22–2.18 (m, 2H), 2.05–1.98 (m, 4H), 1.81–1.66 (m, 4H), 1.46 (m, 4.5H), 1.43 (m, 4.5H). <sup>13</sup>C NMR (75 MHz, CD<sub>3</sub>OD): δ ppm 175.31, 169.94, 159.52, 159.35, 156.49, 156.44, 13662, 136.54, 136.51, 132.16, 130.69, 130.66, 130.12, 129.70, 129.63, 128.44, 124.50, 124.36, 124.30, 113.29, 113.15, 81.17, 81.13, 77.89, 77.82, 77.12, 52.76, 52.32, 45.52, 45.13, 38.37, 38.03, 37.43, 26.66, 25.08, 25.01, 20.88.

**(S)-4-((1-(tert-Butoxycarbonyl) pyrrolidin-3-yl) oxy)-3-(4-methylcyclohexyl) benzoic acid (53a).** The synthesis of compound **53a** followed the same procedure as for compound **50**. Column chromatography (silica gel, hexanes:acetone:AcOH = 88:10:2) afforded white solid (0.0763 g, 36% yield). <sup>1</sup>H NMR (500 MHz, CDCl<sub>3</sub>): δ ppm 7.88–7.79 (m, 2H), 6.64–6.60 (m, 1H), 4.87–4.83 (m, 1H), 3.61–3.43 (m, 4H), 2.72–2.67 (m, 1H), 2.12–2.03 (m, 2H), 1.67–1.56 (m, 4H), 1.48–1.42 (m, 11H), 1.36–1.20 (m, 3H), 0.93 (d, 3H, *J* = 6.1 Hz). <sup>13</sup>C NMR (75 MHz, CD<sub>3</sub>OD): δ ppm 172.17, 158.67, 156.52, 156.46, 137.61, 137.53, 130.00, 129.68, 127.03, 126.85, 113.07, 113.04, 81.08, 81.05, 77.74, 76.92, 52.81, 52.33, 45.55, 45.16, 39.46, 39.42, 38.60, 37.02, 33.87, 33.46, 32.38, 31.69, 28.80, 28.56, 28.21, 27.73, 27.67, 23.19, 18.40.

**(S)-4-((1-(tert-Butoxycarbonyl) pyrrolidin-3-yl) oxy)-3-(4-ethylcyclohexyl) benzoic acid (53b).** The synthesis of compound **53b** followed the same procedure as for compound **50**. Column chromatography (silica gel, hexanes:acetone:AcOH = 88:10:2) afforded white solid (0.111 g, 45% yield). <sup>1</sup>H NMR (500 MHz, CD<sub>3</sub>OD): δ ppm 7.90–7.86 (m, 1H), 7.85–7.82 (m,

1H), 6.96–6.93 (m, 1H), 5.10–5.08 (m, 1H), 3.61–3.48 (m, 4H), 2.88–2.79 (m, 1H), 2.20–2.16 (m, 2H), 1.87–1.62 (m, 6H), 1.56–1.48 (m, 2H), 1.46 (s, 4.5H), 1.43 (s, 4.5H), 1.29–1.17 (m, 2H), 1.07–1.00 (m, 1H), 0.93–0.89 (m, 3H). <sup>13</sup>C NMR (125 MHz, CD<sub>3</sub>OD): δ ppm 172.26, 158.66, 158.62, 156.52, 156.50, 156.44, 156.42, 137.61, 137.53, 130.05, 129.99, 129.67, 129.64, 127.12, 127.09, 126.92, 113.06, 81.06, 81.01, 77.75, 76.91, 52.78, 52.32, 45.55, 45.15, 40.62, 39.49, 39.22, 39.13, 39.00, 36.07, 34.68, 34.60, 34.57, 34.54, 34.52, 34.16, 34.08, 33.65, 33.57, 32.40, 32.38, 31.72, 31.68, 31.40, 31.30, 31.21, 31.19, 31.16, 30.75, 29.60, 28.81, 28.56, 28.48, 28.05, 27.91, 25.14, 12.82, 11.93.

**(S)-4-((1-(*tert*-Butoxycarbonyl) pyrrolidin-3-yl) oxy)-3-(4,4-dimethylcyclohexyl) benzoic acid (53c).** The synthesis of compound **53c** followed the same procedure as for compound **50**. Column chromatography (silica gel, hexanes:acetone:AcOH = 85:15:2) afforded white solid (0.164 g, 58% yield). <sup>1</sup>H NMR (500 MHz, CDCl<sub>3</sub>): δ ppm 7.88–7.81 (m, 2H), 6.64–6.64 (m, 1H), 4.88–4.85 (m, 1H), 3.64–3.41 (m, 4H), 2.63 (t, 1H, *J* = 10.3 Hz), 2.14–2.05 (m, 2H), 1.62–1.50 (m, 4H), 1.46 (s, 4.5H), 1.44 (s, 4.5H), 1.41 (m, 2H), 1.25 (t, 2H, *J* = 12.3 Hz), 0.90 (s, 3H), 0.88 (s, 3H). <sup>13</sup>C NMR (125 MHz, CDCl<sub>3</sub>): δ ppm 172.35, 157.63, 154.48, 154.40, 135.87, 135.77, 129.25, 129.11, 124.58, 124.47, 110.98, 79.54, 79.44, 76.16, 75.30, 51.60, 51.29, 44.13, 43.78, 39.75, 38.36, 38.23, 33.05, 31.41, 30.75, 29.77, 28.40, 28.21, 28.07, 28.00, 24.25.

**(S)-4-((1-(*tert*-Butoxycarbonyl) pyrrolidin-3-yl) oxy)-3-(4,4-difluorocyclohexyl) benzoic acid (53d).** The synthesis of compound **53d** followed the same procedure as for compound **50**. Column chromatography (silica gel, hexanes:acetone:AcOH = 88:10:2) afforded white solid (0.0486 g, 18% yield). <sup>1</sup>H NMR (500 MHz, CD<sub>3</sub>OD): δ ppm 7.88–7.87 (m, 1H), 7.84–7.81 (m, 1H), 6.95–6.92 (m, 1H), 5.12–5.10 (m, 1H), 3.60–3.50 (m, 4H), 2.98–2.94 (m, 1H), 2.24–2.20 (m, 2H), 2.15–2.10 (m, 2H), 1.86–1.81 (m, 6H), 1.47 (s, 4.5H), 1.43 (s, 4.5H). <sup>13</sup>C NMR (125 MHz, CD<sub>3</sub>OD): δ ppm 180.27, 175.29, 157.42, 157.35, 156.56, 156.52, 134.67, 134.65, 134.54, 131.55, 130.03, 129.63, 129.59, 129.63, 129.59, 124.40, 112.95, 81.13, 81.09, 77.68, 76.99, 52.74, 52.34, 45.85, 45.18, 37.70, 37.57, 35.36, 32.44, 31.72, 30.05, 29.97, 29.90, 28.82, 28.76, 24.14.

**(S)-4-((1-(*tert*-Butoxycarbonyl) pyrrolidin-3-yl) oxy)-3-cyclopentylbenzoic acid (53e).** The synthesis of compound **53e** followed the same procedure as for compound **50**. Column chromatography (silica gel, hexanes:acetone:AcOH = 88:10:2) afforded white solid (0.152 g, 68% yield). <sup>1</sup>H NMR (500 MHz, CDCl<sub>3</sub>): δ ppm 7.87–7.81 (m, 2H), 6.66–6.62 (m, 1H), 4.89–4.85 (m, 1H), 3.65–3.41 (m, 4H), 3.14–3.11 (m, 1H), 2.14–2.11 (m, 1H), 2.08–2.04 (m, 1H), 1.90–1.86 (m, 2H), 1.69–1.66 (m, 2H), 1.59–1.50 (m, 2H), 1.51–1.48 (m, 2H), 1.46 (s, 4.5H), 1.44 (s, 4.5H). <sup>13</sup>C NMR (125 MHz, CDCl<sub>3</sub>): δ ppm 172.32, 158.08, 154.54, 154.46, 134.73, 134.57, 129.23, 129.18, 124.40, 124.24, 110.88, 79.56, 79.47, 76.22, 75.36, 51.66, 51.40, 44.12, 43.78, 39.43, 32.49, 32.36, 32.30, 31.35, 30.84, 30.70, 28.40, 25.40, 24.75.

**Benzyl 4-(3-(4-(*tert*-butoxycarbonyl) piperazin-1-yl)-5-fluorobenzoyl) piperazine-1-carboxylate (29).** The synthesis of compound **29** followed the same procedure as for compound **34**. Column chromatography (silica gel, hexanes:acetone = 70:30) afforded yellow solid (0.873 g, 91% yield). <sup>1</sup>H NMR (500 MHz, CDCl<sub>3</sub>): δ ppm 7.29–7.24 (m, 5H), 6.63 (s, 1H), 6.57 (td, 1H, *J* = 2.0, 11.9 Hz), 6.46 (d, 1H, *J* = 7.7 Hz), 5.09 (s, 2H), 3.66–3.54 (m, 12H), 3.11 (t, 4H, *J* = 5.0 Hz), 1.42 (s, 9H). <sup>13</sup>C NMR (125 MHz, CDCl<sub>3</sub>): δ ppm 169.26 (d, *J* = 2.8 Hz), 163.17 (d, *J* = 245.8 Hz), 154.79, 154.27, 152.70 (d, *J* = 10.1 Hz), 137.5 (d, *J* = 8.9 Hz), 136.07, 128.28, 127.92, 127.73, 109.51 (d, *J* = 2.1 Hz), 104.09 (d, *J* = 23.5 Hz), 103.59 (d, *J* = 25.1 Hz), 79.78, 67.19, 47.99, 28.12.

**tert-Butyl 4-(3-fluoro-5-(piperazine-1-carbonyl) phenyl) piperazine-1-carboxylate (30).** The synthesis of compound **30** followed the same procedure as for compound **35** to afford off-white solid (0.644 g, 99% yield). <sup>1</sup>H NMR (500 MHz, CD<sub>3</sub>OD): δ ppm 6.77–6.74 (m, 2H), 6.55 (d, *J* = 7.3 Hz), 3.77–3.71 (m, 2H), 3.52–3.43 (m, 6H), 3.18–3.16 (m, 4H), 2.96–2.88 (m, 4H), 1.44 (s, 9H). <sup>13</sup>C NMR (125 MHz, CD<sub>3</sub>OD): δ ppm 171.19, 164.87 (d, *J* = 244.1 Hz), 156.12, 154.43 (d, *J* = 10.3 Hz), 138.96 (d, *J* = 9.1 Hz), 110.73 (d, *J* = 1.6 Hz), 104.95 (d, *J* = 23.8 Hz), 104.67 (d, *J* = 25.5 Hz), 81.26, 49.20, 28.76.

**tert-Butyl (S)-4-(3-(4-(4-((1-(tert-butoxycarbonyl) pyrrolidin-3-yl) oxy)-3-cyclohexylbenzoyl) piperazine-1-carbonyl)-5-fluorophenyl) piperazine-1-carboxylate (31a).** The synthesis of compound **31a** followed the same procedure as for compound **36**. Column chromatography (silica gel, hexanes:acetone = 70:30) afforded white solid (0.0494 g, 21% yield). <sup>1</sup>H NMR (500 MHz, CDCl<sub>3</sub>): δ ppm 7.25–7.20 (m, 2H), 6.78 (d, 1H, *J* = 7.8 Hz), 6.68 (s, 1H), 6.60 (d, 1H, *J* = 11.8 Hz), 6.52 (d, 1H, *J* = 7.2 Hz), 4.94–4.92 (m, 1H), 3.77–3.46 (m, 16H), 3.17–3.15 (m, 4H), 2.86–2.81 (m, 1H), 2.22–2.18 (m, 1H), 2.14–2.09 (m, 1H), 1.80–1.72 (m, 6H), 1.46 (s, 9H), 1.44 (s, 9H), 1.38–1.28 (m, 4H). <sup>13</sup>C NMR (125 MHz, CDCl<sub>3</sub>): δ ppm 170.91, 169.58, 163.39 (d, *J* = 246.0 Hz), 155.64, 155.52, 154.53, 154.51, 154.37, 152.93 (d, *J* = 10.1 Hz), 137.52 (d, *J* = 8.3 Hz), 137.33 (d, *J* = 11.0 Hz), 127.22, 126.50, 126.09, 126.0, 111.83, 109.75, 104.36 (d, *J* = 23.2 Hz), 103.9 (d, *J* = 23.2 Hz), 80.09, 79.50, 79.42, 76.46, 75.36, 53.77, 51.45, 50.96, 48.22, 44.18, 43.82, 37.31, 37.22, 33.08, 33.03, 32.80, 32.59, 31.68, 31.67, 31.63, 30.92, 29.21, 28.41, 28.33, 26.94, 26.88, 26.22.

**tert-Butyl (S)-4-(3-(4-(4-((1-(tert-butoxycarbonyl) pyrrolidin-3-yl) oxy)-3-(4-(trifluoromethyl) cyclohexyl) benzoyl) piperazine-1-carbonyl)-5-fluorophenyl) piperazine-1-carboxylate (31b).** The synthesis of compound **31b** followed the same procedure as for compound **36**. Column chromatography (silica gel, hexanes:acetone = 70:30) afforded white solid (0.0997 g, 68% yield). <sup>1</sup>H NMR (500 MHz, CDCl<sub>3</sub>): δ ppm 7.25–7.22 (m, 2H), 6.80–6.77 (m, 1H), 6.67–6.66 (m, 1H), 6.61–6.58 (m, 1H), 6.51–6.50 (m, 1H), 4.94–4.92 (m, 1H), 3.73–3.45 (m, 16H), 3.16–3.14 (m, 4H), 2.93–2.90 (m, 1H), 2.33–2.28 (m, 1H), 2.19–2.10 (m, 2H), 2.03–1.98 (m, 3H), 1.92–1.87 (m, 1H), 1.76–1.63 (m, 4H), 1.45 (s, 9H), 1.43 (s, 9H). <sup>13</sup>C NMR (125 MHz, CDCl<sub>3</sub>): δ ppm 170.66, 169.50, 163.35 (d, *J* = 246.0 Hz), 155.61, 154.46, 154.32, 152.85 (d, *J* = 9.5 Hz), 137.46 (d, *J* = 8.9 Hz), 135.74, 135.59, 129.69, 127.46, 127.24, 126.78, 126.51, 126.44, 111.90, 111.83, 109.72, 104.37 (d, *J* = 22.9 Hz), 103.88 (d, *J* = 25.2 Hz), 80.05, 80.03, 79.53, 79.45, 76.48, 75.46, 51.41, 51.02, 48.21, 44.10, 43.75, 36.85, 36.63, 36.47, 35.57, 35.55, 31.50, 30.90, 30.81, 29.56, 29.16, 28.36, 28.27, 27.54, 27.35, 27.24, 25.25, 23.84, 20.92, 14.08.

**tert-Butyl (S)-4-(3-(4-(6-((1-(tert-butoxycarbonyl) pyrrolidin-3-yl) oxy)-3',4'-difluoro-[1,1'-biphenyl]-3-carbonyl) piperazine-1-carbonyl)-5-fluorophenyl) piperazine-1-carboxylate (54a).** The synthesis of compound **54a** followed the same procedure as for compound **36**. Column chromatography (silica gel, hexanes:acetone = 70:30) afforded white solid (0.144 g, 69% yield). <sup>1</sup>H NMR (500 MHz, CDCl<sub>3</sub>): δ ppm 7.37–7.33 (m, 2H), 7.25–7.20 (m, 1H), 7.15–7.10 (m, 2H), 6.92 (d, 1H, *J* = 8.1 Hz), 6.64 (s, 1H), 6.57 (d, 1H, *J* = 11.5 Hz), 6.47 (d, 1H, *J* = 7.4 Hz), 4.91–4.88 (m, 1H), 3.77–3.24 (m, 16H), 3.14–3.11 (m, 4H), 2.08–2.04 (m, 2H), 1.42 (s, 9H), 1.40 (s, 5H), 1.39 (s, 4H). <sup>13</sup>C NMR (125 MHz, CDCl<sub>3</sub>): δ ppm 169.84, 169.44 (d, *J* = 2.4 Hz), 163.26 (d, *J* = 246.11 Hz), 155.05, 154.86, 154.38, 154.12, 152.81 (d, *J* = 10.1 Hz), 150.62, 150.59, 150.49, 148.72, 148.62, 148.50, 137.31 (d, *J* = 8.6 Hz), 133.94, 133.79, 130.13, 129.87, 129.68, 128.32, 128.29, 127.92, 125.23, 118.30, 118.25, 118.23, 118.16, 118.11, 118.08, 116.81, 116.76, 116.67, 116.63, 113.44, 113.32, 109.58, 104.16 (d, *J* = 23.4 Hz), 103.77 (d, *J* = 25.5 Hz),



79.96, 79.48, 77.20, 77.17, 76.13, 69.30, 53.72, 51.26, 50.67, 48.06, 43.95, 43.51, 31.58, 31.36, 30.73, 30.52, 29.09, 28.23, 28.20.

***tert*-Butyl (S)-4-(3-(4-(4-((1-(*tert*-butoxycarbonyl) pyrrolidin-3-yl) oxy)-3-(4-methylcyclohexyl) benzoyl) piperazine-1-carbonyl)-5-fluorophenyl) piperazine-1-carboxylate (54b).** The synthesis of compound **54b** followed the same procedure as for compound **36**. Column chromatography (silica gel, hexanes:acetone = 70:30) afforded white solid (0.0313 g, 22% yield). <sup>1</sup>H NMR (300 MHz, CDCl<sub>3</sub>): δ ppm 7.30–7.28 (m, 1H), 7.24–7.19 (m, 1H), 6.80–6.77 (m, 1H), 6.70–6.68 (m, 1H), 6.64–6.59 (m, 1H), 6.55–6.52 (m, 1H), 4.95–4.93 (m, 1H), 3.78–3.48 (m, 16H), 3.17 (t, 4H, *J* = 4.7 Hz), 2.83–2.78 (m, 1H), 2.21–2.10 (m, 2H), 1.99–1.95 (m, 1H), 1.80–1.52 (m, 6H), 1.47 (s, 9H), 1.45 (s, 9H), 1.32–1.25 (m, 2H), 1.01 (d, 3H, *J* = 7.2 Hz). <sup>13</sup>C NMR (75 MHz, CDCl<sub>3</sub>): δ ppm 170.99, 169.64, 163.42 (d, *J* = 245.9 Hz), 155.81, 155.69, 154.56, 152.96 (d, *J* = 10.0 Hz), 137.53 (d, *J* = 8.5 Hz), 137.31, 127.15, 126.86, 126.11, 111.78, 109.82 (d, *J* = 2.3 Hz), 104.45 (d, *J* = 23.8 Hz), 103.98 (d, *J* = 25.7 Hz), 80.17, 79.56, 79.50, 53.73, 48.28, 37.69, 32.53, 32.15, 31.73, 30.93, 29.67, 29.23, 28.45, 28.37, 27.00, 26.56, 22.62, 17.90.

***tert*-Butyl (S)-4-(3-(4-(4-((1-(*tert*-butoxycarbonyl) pyrrolidin-3-yl) oxy)-3-(4-ethylcyclohexyl) benzoyl) piperazine-1-carbonyl)-5-fluorophenyl) piperazine-1-carboxylate (54c).** The synthesis of compound **54c** followed the same procedure as for compound **36**. Column chromatography (silica gel, hexanes:acetone = 70:30) afforded white solid (0.120 g, 58% yield). <sup>1</sup>H NMR (500 MHz, CDCl<sub>3</sub>): δ ppm 7.23–7.16 (m, 2H), 6.75–6.73 (m, 1H), 6.65–6.64 (m, 1H), 6.58–6.56 (m, 1H), 6.49–6.48 (m, 1H), 4.91–4.89 (m, 1H), 3.71–3.45 (m, 16H), 3.14–3.12 (m, 4H), 2.82–2.75 (m, 1H), 2.17–2.05 (m, 2H), 1.80–1.47 (m, 6H), 1.43 (s, 9H), 1.40 (s, 9H), 1.36–1.19 (m, 5H), 0.84 (t, 3H, *J* = 7.4 Hz). <sup>13</sup>C NMR (125 MHz, CDCl<sub>3</sub>): δ ppm 170.80, 169.45, 163.28 (d, *J* = 246.2 Hz), 155.63, 155.52, 154.39, 152.76 (d, *J* = 10.3 Hz), 137.44 (d, *J* = 9.1 Hz), 127.06, 126.68, 126.34, 125.94, 111.69, 109.68, 104.32 (d, *J* = 23.1 Hz), 103.83 (d, *J* = 25.2 Hz), 79.97, 79.37, 79.29, 76.34, 75.26, 53.73, 51.36, 50.87, 48.15, 44.09, 43.71, 39.05, 37.46, 37.31, 37.22, 34.30, 33.01, 32.69, 31.60, 31.51, 30.79, 30.76, 29.93, 29.81, 29.11, 28.31, 28.22, 27.16, 26.90, 26.71, 23.89, 12.20, 11.36.

***tert*-Butyl (S)-4-(3-(4-(4-((1-(*tert*-butoxycarbonyl) pyrrolidin-3-yl) oxy)-3-(4,4-dimethylcyclohexyl) benzoyl) piperazine-1-carbonyl)-5-fluorophenyl) piperazine-1-carboxylate (54d).** The synthesis of compound **54d** followed the same procedure as for compound **36**. Column chromatography (silica gel, hexanes:acetone = 70:30) afforded white solid (0.0884 g, 44% yield). <sup>1</sup>H NMR (500 MHz, CDCl<sub>3</sub>): δ ppm 7.27 (s, 1H), 7.23–7.18 (m, 1H), 6.76 (d, 1H, *J* = 8.3 Hz), 6.67 (s, 1H), 6.59 (d, 1H, 11.6 Hz), 6.51 (d, 1H, 7.5 Hz), 4.93–4.91 (m, 1H), 3.74–3.45 (m, 16H), 3.16–3.14 (m, 4H), 2.74–2.68 (m, 1H), 2.21–2.15 (m, 1H), 2.12–2.07 (m, 1H), 1.57–1.52 (m, 4H), 1.45 (s, 9H), 1.43 (s, 11H), 1.32–1.26 (m, 2H), 0.92 (s, 6H). <sup>13</sup>C NMR (125 MHz, CDCl<sub>3</sub>): δ ppm 171.03, 169.65, 163.35 (d, *J* = 246.0 Hz), 155.82, 155.72, 154.58, 154.53, 154.42, 152.88 (d, *J* = 10.1 Hz), 137.34 (d, *J* = 8.7 Hz), 137.00, 126.96, 126.69, 126.08, 126.01, 111.69, 109.74 (d, *J* = 1.6 Hz), 104.33 (d, *J* = 23.7 Hz), 103.91 (d, *J* = 25.1 Hz), 80.16, 79.62, 79.54, 76.34, 75.36, 51.49, 50.99, 48.17, 44.18, 43.78, 39.71, 39.67, 39.62, 37.88, 37.82, 32.97, 31.55, 30.81, 29.80, 28.50, 28.44, 28.38, 28.29, 28.18, 28.13, 24.20.

***tert*-Butyl (S)-4-(3-(4-(4-((1-(*tert*-butoxycarbonyl) pyrrolidin-3-yl) oxy)-3-(4,4-difluorocyclohexyl) benzoyl) piperazine-1-carbonyl)-5-fluorophenyl) piperazine-1-carboxylate (54e).** The synthesis of compound **54e** followed the same procedure as for compound **36**. Column chromatography (silica gel, hexanes:acetone = 70:30) afforded white solid (0.0530 g, 61% yield). <sup>1</sup>H NMR (500 MHz, CDCl<sub>3</sub>): δ ppm 7.28–7.23 (m, 2H), 6.81–6.80

(m, 1H), 6.70–6.68 (m, 1H), 6.63–6.60 (m, 1H), 6.53–6.52 (m, 1H), 4.97–4.95 (m, 1H), 3.77–3.46 (m, 16H), 3.18–3.16 (m, 4H), 2.94–2.89 (m, 1H), 2.20–2.15 (m, 4H), 1.89–1.70 (m, 6H), 1.47 (s, 9H), 1.45 (s, 9H). <sup>13</sup>C NMR (125 MHz, CDCl<sub>3</sub>): δ ppm 170.56, 169.58, 163.40 (d, *J* = 246.2 Hz), 155.58, 154.52, 152.89 (d, *J* = 10.3 Hz), 137.49 (d, *J* = 8.2 Hz), 134.55, 127.44, 126.76, 126.74, 126.72, 126.68, 126.59, 126.57, 111.88, 109.82, 104.45 (d, *J* = 23.4 Hz), 103.99 (d, *J* = 24.8 Hz), 80.14, 79.68, 79.63, 53.75, 51.45, 50.97, 48.29, 44.17, 43.80, 35.92, 35.65, 34.31, 34.10, 33.93, 31.70, 31.64, 30.89, 29.22, 28.62, 28.53, 28.43, 28.35.

***tert*-Butyl (S)-4-(3-(4-(4-((1-(*tert*-butoxycarbonyl) pyrrolidin-3-yl) oxy)-3-cyclopentylbenzoyl) piperazine-1-carbonyl)-5-fluorophenyl) piperazine-1-carboxylate (54f).**

The synthesis of compound **54f** followed the same procedure as for compound **36**. Column chromatography (silica gel, hexanes:acetone = 70:30) afforded white solid (0.0742 g, 41% yield). <sup>1</sup>H NMR (500 MHz, CDCl<sub>3</sub>): δ ppm 7.28 (s, 1H), 7.23–7.19 (m, 1H), 6.77 (d, 1H, *J* = 8.3 Hz), 6.68 (s, 1H), 6.60 (d, *J* = 11.8 Hz), 6.52 (d, *J* = 7.5 Hz), 4.95–4.93 (m, 1H), 3.75–3.45 (m, 16H), 3.23–3.19 (m, 1H), 3.17–3.15 (m, 4H), 2.23–2.16 (m, 1H), 2.13–2.09 (m, 1H), 1.98–1.93 (m, 2H), 1.75–1.71 (m, 2H), 1.66–1.62 (m, 2H), 1.55–1.49 (m, 2H), 1.46 (s, 9H), 1.44 (s, 9H). <sup>13</sup>C NMR (125 MHz, D<sub>2</sub>O): δ ppm 170.89, 169.57 (d, *J* = 2.5 Hz), 163.39 (d, *J* = 246.0 Hz), 156.27, 156.21, 154.56, 154.51, 154.41, 152.93 (d, *J* = 10.1 Hz), 137.51 (d, *J* = 8.1 Hz), 135.90, 135.77, 127.00, 126.76, 126.06, 126.04, 126.02, 111.54, 109.75 (d, *J* = 1.9 Hz), 104.36 (d, *J* = 23.6 Hz), 103.91 (d, *J* = 25.3 Hz), 80.10, 79.53, 79.45, 76.39, 75.39, 51.59, 51.15, 48.23, 44.18, 43.79, 39.44, 39.35, 32.60, 32.54, 32.32, 31.51, 30.78, 28.42, 28.33, 25.46.

***tert*-Butyl (S)-4-(3-(4-(4-((1-(*tert*-butoxycarbonyl) pyrrolidin-3-yl) oxy)-3-methylbenzoyl) piperazine-1-carbonyl)-5-fluorophenyl) piperazine-1-carboxylate (54g).**

The synthesis of compound **54g** followed the same procedure as for compound **36**. Column chromatography (silica gel, hexanes:acetone = 70:30) afforded white solid (0.2507 g, 81% yield). <sup>1</sup>H NMR (500 MHz, CDCl<sub>3</sub>): δ ppm 7.15–7.11 (m, 2H), 6.70–6.68 (m, 1H), 6.61–6.59 (m, 1H), 6.54–6.51 (m, 1H), 6.45–6.43 (m, 1H), 4.85–4.83 (m, 1H), 3.66–3.44 (m, 16H), 3.10–3.07 (m, 4H), 2.09 (s, 3H), 1.38 (s, 9H), 1.37 (s, 9H). <sup>13</sup>C NMR (125 MHz, CDCl<sub>3</sub>): δ ppm 170.34, 169.24 (d, *J* = 2.7 Hz), 163.15 (d, *J* = 246.0 Hz), 156.40, 154.23, 152.64 (d, *J* = 10.1 Hz), 137.36 (d, *J* = 8.8 Hz), 129.99, 127.78, 126.90, 126.02, 111.39, 109.44 (d, *J* = 1.5 Hz), 104.05 (d, *J* = 23.3 Hz), 103.57 (d, *J* = 25.1 Hz), 79.74, 79.14, 76.35, 75.47, 51.35, 50.95, 47.94, 43.88, 43.49, 31.35, 30.57, 28.18, 28.09.

**(S)-4-(3',4'-Difluoro-6-(pyrrolidin-3-yloxy)-[1,1'-biphenyl]-3-carbonyl) piperazin-1-yl (3-fluoro-5-(piperazin-1-yl) phenyl) methanone hydrochloride (10).**

The synthesis of compound **10** followed the same procedure as for compound **3** to afford white solid (0.116 g, 97% yield). <sup>1</sup>H NMR (500 MHz, d<sup>6</sup>-DMSO): δ ppm 9.45 (brs, 2H), 9.28 (brs, 2H), 7.68 – 7.64 (m, 2H), 7.48 – 7.39 (m, 3H), 7.20 (d, 1H, *J* = 8.5 Hz), 6.90 (d, 1H, *J* = 12.5 Hz), 6.80 (s, 1H), 6.65 (d, 1H, *J* = 8.0 Hz), 5.18 – 5.15 (m, 1H), 3.64 – 3.09 (m, 20H), 2.21 – 2.03 (m, 2H), 7.41 (d, 1H, *J* = 7.4 Hz), 7.13–7.10 (m, 4H), 7.00 (s, 1H), 6.76–6.72 (m, 2H), 6.44 (s, 1H), 5.15–5.11 (m, 1H), 3.69–3.12 (m, 20H), 2.24–2.16 (m, 1H), 2.09–2.04 (m, 1H). <sup>13</sup>C NMR (125 MHz, D<sub>2</sub>O): δ ppm 171.43, 170.81, 163.60 (d, *J* = 244.4 Hz), 154.66, 150.45, 148.50, 136.92, 136.85, 134.06, 129.76, 129.16, 127.73, 126.25, 118.27, 118.13, 117.26, 117.13, 114.35, 110.56, 105.34, 76.63, 50.45, 45.64, 44.42, 43.05, 42.76, 30.45, 29.60. HRMS (ESI) *m/z* calculated for C<sub>32</sub>H<sub>34</sub>F<sub>3</sub>N<sub>5</sub>O<sub>3</sub> (M+H)<sup>+</sup> = 594.2687, found 594.2698.

**(S)-4-(3-Cyclohexyl-4-(pyrrolidin-3-yloxy) benzoyl) piperazin-1-yl (3-fluoro-5-(piperazin-1-yl) phenyl) methanone hydrochloride (11).** The synthesis of compound **11** followed the same procedure as for compound **3** to afford white solid (0.0392 g, 98% yield). <sup>1</sup>H NMR (500 MHz,

$d^6$ -DMSO):  $\delta$  ppm 9.34 (brs, 4H), 7.24 – 7.22 (m, 2H), 7.00 (d, 1H,  $J = 9.0$  Hz), 6.90 (d, 1H,  $J = 12.5$  Hz), 6.80 (s, 1H), 6.64 (d, 1H,  $J = 8.5$  Hz), 5.18 – 5.14 (m, 1H), 3.62 – 2.85 (m, 20H), 2.90 – 2.85 (m, 1H), 2.19 – 1.20 (m, 12H).  $^{13}\text{C}$  NMR (75 MHz,  $\text{D}_2\text{O}$ ):  $\delta$  ppm 172.71, 171.23, 163.38 (d,  $J = 243.2$  Hz), 155.12 (d,  $J = 16.8$  Hz), 151.97, 137.68, 136.77 (d,  $J = 15.0$  Hz), 127.07, 126.46, 126.34, 112.69, 110.65, 105.80, 105.43, 75.91, 50.74, 47.76, 47.17, 45.85, 44.47, 42.99, 42.69, 42.11, 36.56, 32.97, 30.66, 26.59, 25.94. HRMS (ESI)  $m/z$  calculated for  $\text{C}_{32}\text{H}_{43}\text{FN}_5\text{O}_3$  ( $\text{M}+\text{H}$ ) $^+$  = 564.3344, found 564.3348.

**(S)-(4-(3-Cyclopentyl-4-(pyrrolidin-3-yloxy) benzoyl) piperazin-1-yl) (3-fluoro-5-(piperazin-1-yl) phenyl) methanone hydrochloride (12).** The synthesis of compound **12** followed the same procedure as for compound **3** to afford white solid (0.0661 g, quantitative yield, *trans* : *cis* = 2:1). Major isomer:  $^1\text{H}$  NMR (500 MHz,  $d^6$ -DMSO):  $\delta$  ppm 9.47 (brs, 2H), 9.22 (brs, 2H), 7.28–7.22 (m 2H), 7.00 (d, 1H,  $J = 8.5$  Hz), 6.90 (d, 1H,  $J = 12.5$  Hz), 6.80 (s, 1H), 6.65 (d, 1H,  $J = 8.0$  Hz), 5.18 – 5.15 (m, 1H), 3.72–3.16 (m, 20H), 2.90 – 2.82 (m, 1H) 2.20 – 1.07 (m, 11H), 1.00 (d, 1H,  $J = 7.0$  Hz).  $^{13}\text{C}$  NMR (75 MHz,  $\text{D}_2\text{O}$ ):  $\delta$  ppm 172.67, 171.15, 163.23 (d,  $J = 244.9$  Hz), 155.02, 151.79, 151.71, 137.44, 136.63, 136.56, 126.96, 126.89, 126.47, 116.24, 126.07, 112.53, 110.46, 75.73, 50.57, 47.74, 44.15, 46.89, 45.69, 44.31, 42.80, 42.58, 36.40, 36.09, 365.03, 32.62, 32.55, 31.88, 31.55, 30.47, 26.77, 26.70, 21.97. HRMS (ESI)  $m/z$  calculated for  $\text{C}_{31}\text{H}_{40}\text{FN}_5\text{O}_3$  ( $\text{M}+\text{H}$ ) $^+$  = 550.3188, found 550.3208.

**(S)-(4-(3-Fluoro-5-(piperazin-1-yl) benzoyl) piperazin-1-yl) (3-(4-methylcyclohexyl)-4-(pyrrolidin-3-yloxy) phenyl) methanone hydrochloride (13).** The synthesis of compound **13** followed the same procedure as for compound **3** to afford white solid (0.0252 g, quantitative yield).  $^1\text{H}$  NMR (500 MHz,  $d^6$ -DMSO):  $\delta$  ppm 9.40 (brs, 2H), 9.06 (brs, 2H), 7.28 – 7.21 (m, 2H), 7.02 (d, 1H,  $J = 8.0$  Hz), 6.91 (d, 1H,  $J = 12.5$  Hz), 6.80 (s, 1H), 6.65 (d, 1H,  $J = 8.5$  Hz), 5.21 – 5.16 (m 2H), 3.66 – 3.00 (m, 21H), 2.22 – 1.42 (m, 11H).  $^{13}\text{C}$  NMR (125 MHz,  $\text{D}_2\text{O}$ ):  $\delta$  ppm 172.21, 170.73, 163.18 (d,  $J = 242.9$  Hz), 155.19 (d,  $J = 12.4$  Hz), 151.74 (d,  $J = 10.1$  Hz), 151.94 (d,  $J = 10.5$  Hz), 151.91 (d,  $J = 10.4$  Hz), 136.80 (d,  $J = 9.5$  Hz), 126.94 (d,  $J = 23.8$  Hz), 126.86 (d,  $J = 15.1$  Hz), 126.02, 112.66, 110.43, 105.13, 75.70, 50.58, 50.53, 47.75, 47.78, 45.50, 44.33, 42.89, 41.92, 35.61, 30.58, 27.46, 27.32, 24.83, 23.03. HRMS (ESI)  $m/z$  calculated for  $\text{C}_{33}\text{H}_{44}\text{FN}_5\text{O}_3$  ( $\text{M}+\text{H}$ ) $^+$  = 578.3547, found 578.3510.

**(S)-(4-(3-Fluoro-5-(piperazin-1-yl) benzoyl) piperazin-1-yl) (4-(pyrrolidin-3-yloxy)-3-(4-(trifluoromethyl) cyclohexyl) phenyl) methanone hydrochloride (14).** The synthesis of compound **14** followed the same procedure as for compound **3** to afford white solid (0.0767 g, 92% yield).  $^1\text{H}$  NMR (500 MHz,  $d^6$ -DMSO):  $\delta$  ppm 9.41 (brs, 2H), 9.18 (brs, 2H), 7.26–7.22 (m, 2H), 7.00 (d, 1H,  $J = 8.5$  Hz), 6.90 (d, 1H,  $J = 12.0$  Hz), 6.80 (s, 1H), 6.65 (d, 1H,  $J = 8.0$  Hz), 5.18 – 5.15 (m, 1H), 3.70 – 2.81 (m, 21H), 2.21 – 1.10 (m, 13H); 0.86 (t, 3H,  $J = 7.5$  Hz).  $^{13}\text{C}$  NMR (125 MHz,  $\text{D}_2\text{O}$ ):  $\delta$  ppm 171.93, 170.44, 163.09 (d,  $J = 242.9$  Hz), 155.17, 152.10, 152.02, 136.87, 136.32, 127.05, 126.98, 125.55, 112.76, 110.47, 104.79, 75.61, 50.41, 45.38, 44.28, 42.89, 39.24, 36.43, 36.21, 34.51, 32.86, 32.70, 30.68, 29.78, 29.63, 27.31, 27.14, 24.08, 12.13, 11.37. HRMS (ESI)  $m/z$  calculated for  $\text{C}_{33}\text{H}_{41}\text{F}_4\text{N}_5\text{O}_3$  ( $\text{M}+\text{H}$ ) $^+$  = 632.3224, found 632.3235.

**(S)-(4-(3-(4-Ethylcyclohexyl)-4-(pyrrolidin-3-yloxy) benzoyl) piperazin-1-yl) (3-fluoro-5-(piperazin-1-yl) phenyl) methanone hydrochloride (15).** The synthesis of compound **15** followed the same procedure as for compound **3** to afford white solid (0.0836 g, 84% yield).  $^1\text{H}$  NMR (500 MHz,  $d^6$ -DMSO):  $\delta$  ppm 9.22 (brs, 2H), 8.89 (brs, 2H), 7.28 (s, 1H), 7.24 (d, 1H,  $J = 8.5$  Hz), 7.00 (d, 1H,  $J = 8.5$  Hz), 6.91 (d, 1H,  $J = 12.5$  Hz), 6.80 (s, 1H), 6.65 (d, 1H,  $J = 8.5$  Hz), 5.18 – 5.14 (m, 1H), 3.65 – 3.18 (m, 20H), 2.81 – 2.75 (m, 1H), 2.22 – 2.09 (m, 2H), 1.57 – 1.30 (m, 8H), 0.95 (s, 3H), 0.93 (s, 3H).  $^{13}\text{C}$  NMR (125 MHz,  $\text{D}_2\text{O}$ ):  $\delta$  ppm 172.23, 170.72

163.25, 155.33, 152.19, 152.06, 136.88, 136.76, 136.54, 127.06, 126.89, 126.79, 112.78, 110.63, 105.03, 75.72, 50.55, 45.59, 44.41, 42.99, 36.37, 36.77, 32.93, 30.79, 30.40, 30.13, 29.88, 29.88, 29.54, 28.56, 24.24. HRMS (ESI)  $m/z$  calculated for  $C_{33}H_{46}FN_5O_3$  ( $M+H$ )<sup>+</sup> = 592.3663, found 592.3667.

**(S)-(4-(3-(4,4-Dimethylcyclohexyl)-4-(pyrrolidin-3-yloxy) benzoyl) piperazin-1-yl) (3-fluoro-5-(piperazin-1-yl) phenyl) methanone hydrochloride (16).** The synthesis of compound **16** followed the same procedure as for compound **3** to afford white solid (0.0720 g, 97% yield). <sup>1</sup>H NMR (500 MHz, d<sup>6</sup>-DMSO):  $\delta$  ppm 9.72 (brs, 1H), 9.46 (brs, 1H), 9.18 (brs, 2H), 7.27 (d, 1H,  $J$  = 8.5 Hz), 7.23 (s, 1H), 7.04 (d, 1H,  $J$  = 8.5 Hz), 6.90 (d, 1H,  $J$  = 12.5 Hz), 6.80 (s, 1H), 6.64 (d, 1H,  $J$  = 8.0 Hz), 5.23 – 5.19 (m, 1H), 3.72 – 3.08 (m, 21 H), 2.49 – 1.54 (m, 10H). <sup>13</sup>C NMR (125 MHz, D<sub>2</sub>O):  $\delta$  ppm 172.58, 171.19, 163.30 (d,  $J$  = 243.9 Hz), 155.17, 151.81 (d,  $J$  = 10.5 Hz), 136.71 (d,  $J$  = 9.5 Hz), 134.92, 127.01, 126.64, 126.19, 112.48, 110.50, 105.93 (d,  $J$  = 21.9 Hz), 105.49 (d,  $J$  = 25.6 Hz), 75.79, 50.66, 45.74, 44.37, 42.87, 34.56, 33.50, 33.31 (t,  $J$  = 24.8 Hz), 33.12, 30.51, 28.35 (t,  $J$  = 10.4 Hz). HRMS (ESI)  $m/z$  calculated for  $C_{34}H_{47}FN_5O_3$  ( $M+H$ )<sup>+</sup> = 592.3657, found 592.3674.

**(S)-(4-(3-(4,4-Difluorocyclohexyl)-4-(pyrrolidin-3-yloxy) benzoyl) piperazin-1-yl) (3-fluoro-5-(piperazin-1-yl) phenyl) methanone hydrochloride (17).** The synthesis of compound **17** followed the same procedure as for compound **3** to afford white solid (0.0512 g, 84% yield). <sup>1</sup>H NMR (500 MHz, d<sup>6</sup>-DMSO):  $\delta$  ppm 9.30 (brs, 2H), 9.02 (brs, 2H), 7.25 (s, 1H), 7.24 (d, 1H,  $J$  = 8.5 Hz), 7.00 (d, 1H,  $J$  = 8.5 Hz), 6.91 (d, 1H,  $J$  = 12.5 Hz), 6.80 (s, 1H), 6.65 (d, 1H,  $J$  = 8.5 Hz), 5.20 – 5.16 (m, 1H), 3.63 – 3.17 (m, 21H), 2.20 – 1.46 (m, 10H). <sup>13</sup>C NMR (125 MHz, D<sub>2</sub>O):  $\delta$  ppm 172.64, 171.16, 163.01 (d,  $J$  = 243.6 Hz), 155.74, 152.01, 151.87, 136.84, 136.29, 126.89, 126.42, 112.51, 110.63, 75.83, 50.75, 47.77, 47.19, 46.93, 45.78, 44.43, 42.99, 42.62, 42.08, 38.49, 32.77, 32.66, 30.59, 30.36, 25.15. HRMS (ESI)  $m/z$  calculated for  $C_{32}H_{40}F_3N_5O_3$  ( $M+H$ )<sup>+</sup> = 600.3162, found 600.3168.

**(S)-(4-(3-Fluoro-5-(piperazin-1-yl) benzoyl) piperazin-1-yl) (3-methyl-4-(pyrrolidin-3-yloxy) phenyl) methanone hydrochloride (18).** The synthesis of compound **18** followed the same procedure as for compound **3** to afford white solid (0.189 g, 92% yield). <sup>1</sup>H NMR (500 MHz, d<sup>6</sup>-DMSO):  $\delta$  ppm 9.47 (brs, 2H), 9.23 (brs, 2H), 7.24 – 7.22 (m, 2H), 7.00 (d, 1H,  $J$  = 8.5 Hz), 6.90 (d, 1H,  $J$  = 8.5 Hz), 6.80 (s, 1H), 6.64 (d, 1H,  $J$  = 7.5 Hz), 5.20 – 5.17 (m, 1H), 3.61 – 3.16 (m, 20H), 2.19 – 2.09 (m, 5H). <sup>13</sup>C NMR (125 MHz, D<sub>2</sub>O):  $\delta$  ppm 172.29, 170.83, 163.15 (d,  $J$  = 242.9 Hz), 155.90, 155.54, 136.67, 129.84, 128.23, 126.60, 126.36, 112.26, 110.42, 105.77 (d,  $J$  = 20.7 Hz), 105.29 (d,  $J$  = 24.8 Hz), 75.62, 50.64, 47.56, 46.94, 45.62, 44.09, 42.80, 42.48, 41.85, 30.23, 15.39. HRMS (ESI)  $m/z$  calculated for  $C_{27}H_{34}FN_5O_3$  ( $M+H$ )<sup>+</sup> = 496.2724, found 496.2731.

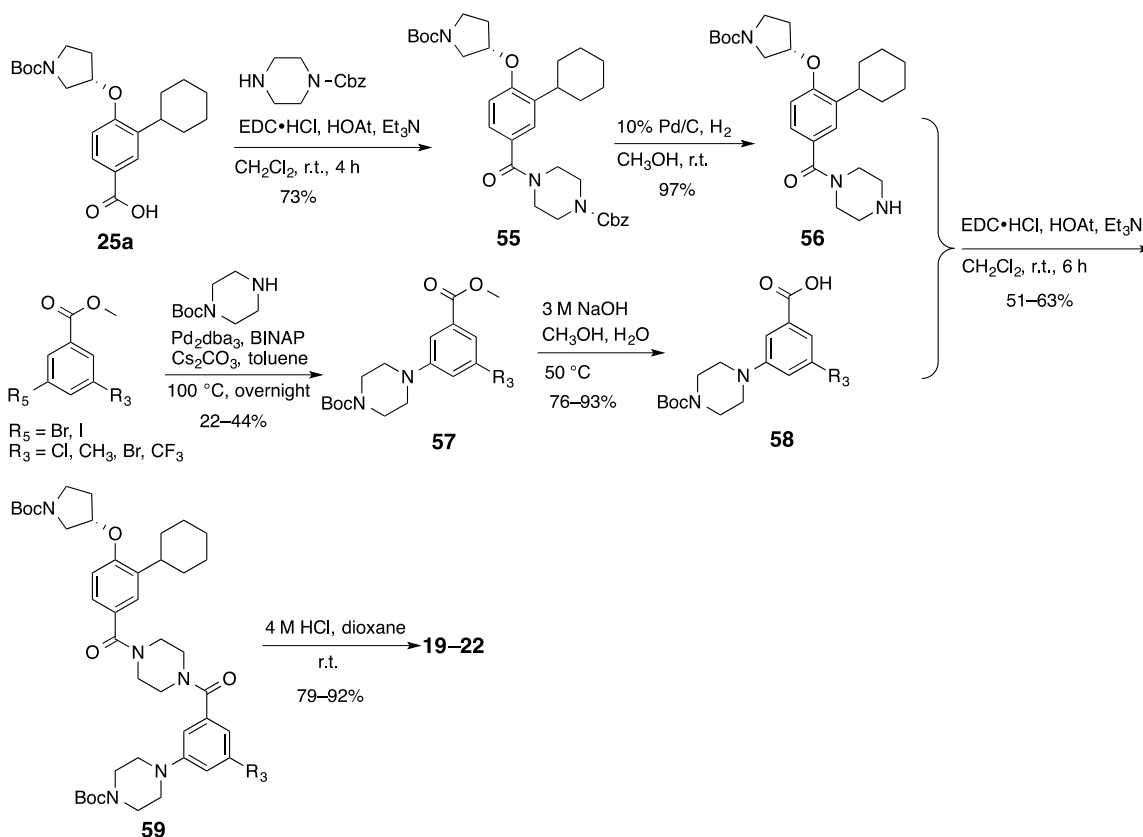

**Benzyl (S)-4-(4-((1-(*tert*-butoxycarbonyl) pyrrolidin-3-yl) oxy)-3-cyclohexylbenzoyl) piperazine-1-carboxylate (55).** The synthesis of compound **55** followed the same procedure as for compound **34**. Column chromatography (silica gel, hexanes:EtOAc = 3:1) afforded white solid (0.800 g, 73% yield).  $^1\text{H}$  NMR (500 MHz,  $\text{CDCl}_3$ ):  $\delta$  ppm 7.34–7.28 (m, 5H), 7.23–7.18 (m, 2H), 6.77 (d, 1H,  $J = 8.3$  Hz), 5.13 (s, 2H), 4.93–4.91 (m, 1H), 3.66–3.48 (m, 12H), 2.83 (t, 1H,  $J = 9.4$  Hz), 2.22–2.16 (m, 1H), 2.12–2.08 (m, 1H), 1.80–1.71 (m, 6H), 1.44 (s, 4.5H), 1.44 (s, 4.5H), 1.38–1.19 (m, 4H).  $^{13}\text{C}$  NMR (125 MHz,  $\text{CDCl}_3$ ):  $\delta$  ppm 170.79, 155.43, 155.02, 154.46, 154.31, 137.22, 137.12, 136.23, 128.40, 128.04, 127.86, 127.44, 126.39, 125.97, 125.91, 111.80, 111.72, 79.40, 79.33, 76.37, 75.27, 67.30, 51.38, 50.94, 44.12, 43.77, 37.24, 37.14, 34.51, 32.96, 32.71, 32.53, 31.54, 31.43, 30.85, 28.34, 26.82, 26.15, 25.13, 22.50.

***tert*-Butyl (S)-3-(2-cyclohexyl-4-(piperazine-1-carbonyl) phenoxy) pyrrolidine-1-carboxylate (56).** The synthesis of compound **56** followed the same procedure as for compound **35** to afford off-white solid (0.58 g, 97% yield).  $^1\text{H}$  NMR (500 MHz,  $\text{CDCl}_3$ ):  $\delta$  ppm 7.23–7.21 (m, 2H), 6.79 (d, 1H,  $J = 8.4$  Hz), 4.95–4.93 (m, 1H), 4.00–3.96 (m, 4H), 3.66–3.47 (m, 4H), 3.25–3.20 (m, 4H), 2.84 (t, 1H,  $J = 10.0$  Hz), 2.23–2.18 (m, 1H), 2.15–2.11 (m, 1H), 1.81–1.72 (m, 6H), 1.45 (s, 9H), 1.39–1.21 (m, 4H).  $^{13}\text{C}$  NMR (125 MHz,  $\text{CDCl}_3$ ):  $\delta$  ppm 170.90, 155.96, 154.60, 154.41, 137.66, 137.59, 126.57, 126.28, 126.21, 126.02, 125.97, 111.91, 79.61, 79.54, 76.53, 75.40, 51.51, 50.99, 44.21, 43.83, 43.51, 37.34, 37.27, 33.10, 33.02, 32.81, 32.56, 31.65, 30.94, 28.44, 26.94, 26.87, 26.19.

***tert*-Butyl 4-(3-chloro-5-(methoxycarbonyl) phenyl) piperazine-1-carboxylate (57a).** The synthesis of compound **57a** followed the same procedure as for compound **27** except using methyl 3-bromo-5-chlorobenzoate. Column chromatography (silica gel, hexanes:EtOAc = 9:1) afforded white solid (0.951 g, 41% yield).  $^1\text{H}$  NMR (500 MHz,  $\text{CDCl}_3$ ):  $\delta$  ppm 7.46–7.45 (m,

1H), 7.44–7.43 (m, 1H), 7.02–7.00 (m, 1H), 3.89 (s, 3H), 3.57–3.54 (m, 4H), 3.19–3.17 (m, 4H), 1.47 (s, 9H). <sup>13</sup>C NMR (125 MHz, CDCl<sub>3</sub>): δ ppm 166.12, 154.55, 151.93, 135.11, 132.14, 120.43, 120.37, 119.93, 115.24, 115.18, 80.06, 52.38, 52.30, 48.53, 28.36.

**tert-Butyl 4-(3-(methoxycarbonyl)-5-methylphenyl) piperazine-1-carboxylate (57b).** The synthesis of compound **57b** followed the same procedure as for compound **27** using methyl 3-bromo-5-methylbenzoate. Column chromatography (silica gel, hexanes:EtOAc = 9:1) afforded white solid (0.246 g, 40% yield). <sup>1</sup>H NMR (300 MHz, CDCl<sub>3</sub>): δ ppm 7.39–7.38 (m, 1H), 7.37–7.36 (m, 1H), 6.92–6.91 (m, 1H), 3.87 (s, 3H), 3.57 (t, 4H, *J* = 5.1 Hz), 3.15 (t, 4H, *J* = 5.0 Hz), 2.34 (s, 3H), 1.47 (s, 9H). <sup>13</sup>C NMR (75 MHz, CDCl<sub>3</sub>): δ ppm 167.32, 154.60, 151.19, 138.95, 130.76, 121.98, 121.72, 114.49, 79.86, 51.99, 49.18, 28.33, 21.53.

**tert-Butyl 4-(3-(methoxycarbonyl)-5-(trifluoromethyl) phenyl) piperazine-1-carboxylate (57c).** The synthesis of compound **57c** followed the same procedure as for compound **27** using methyl 3-bromo-5-trifluoromethylbenzoate. Column chromatography (silica gel, hexanes:EtOAc = 9:1) afforded white solid (0.680 g, 44% yield). <sup>1</sup>H NMR (300 MHz, CDCl<sub>3</sub>): δ ppm 7.70–7.68 (m, 2H), 7.23–7.22 (m, 1H), 3.89 (s, 3H), 3.57 (t, 4H, *J* = 5.2 Hz), 3.21 (t, 4H, *J* = 5.1 Hz), 1.45 (s, 9H). <sup>13</sup>C NMR (125 MHz, CDCl<sub>3</sub>): δ ppm 165.94, 154.46, 151.32, 131.72, 131.71 (q, *J* = 32.4 Hz), 123.67 (q, *J* = 272.8 Hz), 119.74, 119.68, 119.53, 116.95, 116.16, 80.01, 52.50, 52.38, 52.27, 52.16, 48.42, 28.28.

**tert-Butyl 4-(3-bromo-5-(methoxycarbonyl) phenyl) piperazine-1-carboxylate (57d).** The synthesis of compound **57d** followed the same procedure as for compound **27** using methyl 3-bromo-5-iodobenzoate. Column chromatography (silica gel, hexanes:EtOAc = 9:1) afforded white solid (0.103 g, 22% yield). <sup>1</sup>H NMR (500 MHz, CDCl<sub>3</sub>): δ ppm 7.63–7.62 (m, 1H), 7.49–7.48 (m, 1H), 7.18–7.17 (m, 1H), 3.90 (s, 3H), 3.57 (t, 4H, *J* = 5.0 Hz), 3.18 (m, 4H), 1.48 (s, 9H). <sup>13</sup>C NMR (125 MHz, CDCl<sub>3</sub>): δ ppm 166.00, 154.57, 152.07, 132.35, 123.37, 123.11, 122.89, 115.72, 80.09, 52.37, 48.57, 28.38.

**3-(4-(tert-Butoxycarbonyl) piperazin-1-yl)-5-chlorobenzoic acid (58a).** The synthesis of compound **58a** followed the same procedure as for compound **33** to afford white solid (0.197 g, 90% yield). <sup>1</sup>H NMR (300 MHz, CDCl<sub>3</sub>): δ ppm 7.54–7.53 (m, 1H), 7.50–7.49 (m, 1H), 7.07–7.05 (m, 1H), 3.59 (t, 4H, *J* = 5.0 Hz), 3.21 (t, 4H, *J* = 4.9 Hz), 1.48 (s, 9H). <sup>13</sup>C NMR (125 MHz, CDCl<sub>3</sub>): δ ppm 170.50, 154.71, 151.96, 135.27, 131.50, 120.99, 120.91, 120.66, 115.69, 115.61, 80.35, 48.50, 28.37.

**3-(4-(tert-Butoxycarbonyl) piperazin-1-yl)-5-methylbenzoic acid (58b).** The synthesis of compound **58b** followed the same procedure as for compound **33** to afford white solid (0.179 g, 76% yield). <sup>1</sup>H NMR (500 MHz, CDCl<sub>3</sub>): δ ppm 7.47–7.46 (m, 1H), 7.45–7.44 (m, 1H), 6.98–6.97 (m, 1H), 3.60–3.58 (m, 4H), 3.18–3.16 (m, 4H), 2.36 (s, 3H), 1.48 (s, 9H). <sup>13</sup>C NMR (125 MHz, CDCl<sub>3</sub>): δ ppm 171.81, 154.73, 151.21, 139.11, 130.18, 122.65, 122.51, 115.02, 80.07, 49.21, 28.36, 21.53.

**3-(4-(tert-Butoxycarbonyl) piperazin-1-yl)-5-(trifluoromethyl) benzoic acid (58c).** The synthesis of compound **58c** followed the same procedure as for compound **33** to afford white solid (0.609 g, 93% yield). <sup>1</sup>H NMR (500 MHz, CDCl<sub>3</sub>): δ ppm 7.82–7.81 (m, 1H), 7.78–7.77 (m, 1H), 7.31–7.30 (m, 1H), 3.63 (t, 4H, *J* = 4.8 Hz), 3.28–3.26 (m, 4H), 1.49 (s, 9H). <sup>13</sup>C NMR (125 MHz, CDCl<sub>3</sub>): δ ppm 170.16, 154.74, 151.42, 131.99 (q, *J* = 32.5 Hz), 131.20, 123.67 (q, *J* = 272.8 Hz), 120.11, 117.61, 116.91, 80.47, 48.45, 28.36.

**3-Bromo-5-(4-(tert-butoxycarbonyl) piperazin-1-yl) benzoic acid (58d).** The synthesis of compound **58d** followed the same procedure as for compound **33** to afford white solid (0.0816 g, 82% yield). <sup>1</sup>H NMR (500 MHz, CDCl<sub>3</sub>): δ ppm 7.70–7.69 (m, 1H), 7.55 (dd, 1H, *J* = 1.3, 2.3

Hz), 7.24–7.23 (m, 1H), 3.60 (t, 4H,  $J = 4.9$  Hz), 3.22–3.20 (m, 4H), 1.49 (s, 9H).  $^{13}\text{C}$  NMR (125 MHz,  $\text{CDCl}_3$ ):  $\delta$  ppm 170.41, 154.68, 152.12, 131.57, 123.90, 123.64, 123.23, 116.14, 80.31, 48.53, 28.40.

***tert*-Butyl (S)-4-(3-(4-(4-((1-(*tert*-butoxycarbonyl) pyrrolidin-3-yl) oxy)-3-cyclohexylbenzoyl) piperazine-1-carbonyl)-5-chlorophenyl) piperazine-1-carboxylate (59a).**

The synthesis of compound **59a** followed the same procedure as for compound **36**. Column chromatography (silica gel, hexanes:acetone = 70:30) afforded white solid (0.0998 g, 58% yield).  $^1\text{H}$  NMR (500 MHz,  $\text{CDCl}_3$ ):  $\delta$  ppm 7.23–7.19 (m, 2H), 6.89–6.88 (m, 1H), 6.79–6.76 (m, 3H), 4.93–4.91 (m, 1H), 3.74–3.46 (m, 16H), 3.16–3.14 (m, 4H), 2.84–2.81 (m, 1H), 2.21–2.17 (m, 1H), 2.13–2.09 (m, 1H), 1.79–1.71 (m, 6H), 1.45 (s, 9H), 1.43 (s, 9H), 1.38–1.30 (m, 4H).  $^{13}\text{C}$  NMR (125 MHz,  $\text{CDCl}_3$ ):  $\delta$  ppm 170.88, 169.33, 155.60, 155.48, 154.47, 154.32, 152.17, 137.37, 137.26, 135.27, 127.18, 127.14, 126.48, 126.04, 125.98, 117.33, 116.98, 112.45, 111.81, 80.07, 79.46, 79.38, 76.44, 75.34, 51.43, 50.95, 48.29, 44.17, 43.80, 37.29, 37.21, 34.56, 33.06, 32.78, 32.57, 31.61, 31.48, 30.90, 29.59, 28.39, 28.31, 26.86, 26.20, 25.18, 22.55, 20.61, 14.03.

***tert*-Butyl (S)-4-(3-(4-(4-((1-(*tert*-butoxycarbonyl) pyrrolidin-3-yl) oxy)-3-cyclohexylbenzoyl) piperazine-1-carbonyl)-5-methylphenyl) piperazine-1-carboxylate (59b).**

The synthesis of compound **59b** followed the same procedure as for compound **36**. Column chromatography (silica gel, hexanes:acetone = 70:30) afforded white solid (0.0880 g, 51% yield).  $^1\text{H}$  NMR (500 MHz,  $\text{CDCl}_3$ ):  $\delta$  ppm 7.25–7.19 (m, 2H), 6.79–6.76 (m, 2H), 6.73–6.72 (m, 1H), 6.68–6.67 (m, 1H), 4.94–4.92 (m, 1H), 3.76–3.46 (m, 16H), 3.14–3.11 (m, 4H), 2.86–2.81 (m, 1H), 2.31 (s, 3H), 2.22–2.18 (m, 1H), 2.13–2.09 (m, 1H), 1.86–1.72 (m, 6H), 1.46 (s, 9H), 1.44 (s, 9H), 1.38–1.28 (m, 4H).  $^{13}\text{C}$  NMR (125 MHz,  $\text{CDCl}_3$ ):  $\delta$  ppm 170.90, 155.59, 155.47, 154.58, 154.53, 154.37, 151.29, 139.36, 137.35, 137.24, 136.11, 127.34, 126.50, 126.03, 118.97, 118.51, 111.92, 111.83, 79.93, 79.48, 79.41, 76.46, 75.37, 51.45, 50.99, 49.05, 44.18, 43.82, 37.31, 37.22, 34.58, 33.06, 32.80, 32.60, 31.63, 31.50, 30.93, 28.41, 28.34, 26.88, 26.22, 21.65.

***tert*-Butyl (S)-4-(3-(4-(4-((1-(*tert*-butoxycarbonyl) pyrrolidin-3-yl) oxy)-3-cyclohexylbenzoyl) piperazine-1-carbonyl)-5-(trifluoromethyl) phenyl) piperazine-1-carboxylate (59c).**

The synthesis of compound **59c** followed the same procedure as for compound **36**. Column chromatography (silica gel, hexanes:acetone = 70:30) afforded white solid (0.144 g, 65% yield).  $^1\text{H}$  NMR (500 MHz,  $\text{CDCl}_3$ ):  $\delta$  ppm 7.23–7.17 (m, 2H), 7.11–7.10 (m, 1H), 7.05–7.03 (m, 2H), 6.77–6.74 (m, 2H), 4.92–4.90 (m, 1H), 3.74–3.42 (m, 16H), 3.20–3.18 (m, 4H), 2.84–2.79 (m, 1H), 2.20–2.15 (m, 1H), 2.12–2.07 (m, 1H), 1.77–1.69 (m, 6H), 1.44 (s, 9H), 1.42 (s, 9H), 1.37–1.31 (m, 4H).  $^{13}\text{C}$  NMR (125 MHz,  $\text{CDCl}_3$ ):  $\delta$  ppm 170.84, 169.28, 155.59, 155.45, 154.45, 154.39, 154.28, 151.44, 137.30, 137.22, 136.94, 131.82, (q,  $J = 32.3$  Hz), 127.09, 126.42, 126.00, 125.94, 123.55 (q,  $J = 272.8$  Hz), 117.04, 113.87, 113.42, 111.76, 80.04, 79.38, 79.32, 76.39, 75.29, 51.38, 50.87, 48.17, 44.11, 43.73, 37.24, 37.17, 34.50, 34.35, 33.00, 32.96, 32.71, 32.48, 31.56, 31.41, 30.83, 29.13, 28.32, 28.23, 26.86, 26.80, 26.74, 26.14, 25.11.

***tert*-Butyl (S)-4-(3-bromo-5-(4-(4-((1-(*tert*-butoxycarbonyl) pyrrolidin-3-yl) oxy)-3-cyclohexylbenzoyl) piperazine-1-carbonyl) phenyl) piperazine-1-carboxylate (59d).**

The synthesis of compound **59d** followed the same procedure as for compound **36**. Column chromatography (silica gel, hexanes:acetone = 70:30) afforded white solid (0.0845 g, 63% yield).  $^1\text{H}$  NMR (500 MHz,  $\text{CDCl}_3$ ):  $\delta$  ppm 7.19–7.14 (m, 2H), 7.00–6.98 (m, 1H), 6.89–6.87 (m, 1H), 6.77–6.76 (m, 1H), 6.73–6.71 (m, 1H), 4.88–4.86 (m, 1H), 3.68–3.43 (m, 16H), 3.11–3.08 (m, 4H), 2.79–2.75 (m, 1H), 2.16–2.11 (m, 1H), 2.09–2.04 (m, 1H), 1.75–1.66 (m, 6H), 1.40 (s, 9H),

1.38 (s, 9H), 1.33–1.21 (m, 4H).  $^{13}\text{C}$  NMR (125 MHz,  $\text{CDCl}_3$ ):  $\delta$  ppm 170.92, 169.19, 155.63, 154.49, 152.26, 137.62, 137.35, 127.18, 126.51, 126.04, 123.33, 120.23, 119.96, 112.96, 111.84, 80.10, 79.45, 76.45, 75.36, 53.77, 51.44, 50.97, 48.31, 44.18, 43.80, 37.29, 37.24, 33.03, 32.77, 32.59, 31.65, 30.90, 29.19, 28.39, 28.30, 26.88, 26.19.

**(S)-(4-(3-Chloro-5-(piperazin-1-yl) benzoyl) piperazin-1-yl) (3-cyclohexyl-4-(pyrrolidin-3-yloxy) phenyl) methanone hydrochloride (19).** The synthesis of compound **19** followed the same procedure as for compound **3** to afford white solid (0.0752 g, 92% yield).  $^1\text{H}$  NMR (300 MHz,  $d^6$ -DMSO):  $\delta$  ppm 9.49 (brs, 2H), 9.23 (brs, 2H), 7.24 – 7.22 (m, 2H), 7.10 (s, 1H), 7.00 (d, 1H,  $J = 9.0$  Hz), 6.92 (s, 1H), 6.85 (s, 1H), 5.19 – 5.15 (m, 1H), 3.68 – 3.16 (m, 20H), 2.90 – 2.86 (m, 1H), 2.20 – 2.06 (m, 2H), 1.76 – 1.18 (m, 10H).  $^{13}\text{C}$  NMR (125 MHz,  $\text{D}_2\text{O}$ ):  $\delta$  ppm 172.15, 170.37, 154.89, 151.11, 136.52, 134.80, 126.65, 126.34, 125.80, 117.83, 113.06, 112.41, 75.51, 50.36, 47.46, 47.05, 45.34, 44.09, 42.73, 42.28, 41.84, 36.21, 32.75, 32.69, 30.41, 26.32, 25.80. HRMS (ESI)  $m/z$  calculated for  $\text{C}_{32}\text{H}_{42}\text{ClN}_5\text{O}_3$  ( $\text{M}+\text{H}$ ) $^+$  = 580.3054, found 580.3060.

**(S)-(4-(3-Cyclohexyl-4-(pyrrolidin-3-yloxy) benzoyl) piperazin-1-yl) (3-methyl-5-(piperazin-1-yl) phenyl) methanone hydrochloride (20).** The synthesis of compound **20** followed the same procedure as for compound **3** to afford peach solid (0.0648 g, 90% yield).  $^1\text{H}$  NMR (500 MHz,  $d^6$ -DMSO):  $\delta$  ppm 9.44 (brs, 2H), 9.12 (brs, 2H), 7.24 – 7.22 (m, 2H), 7.00 (d, 1H,  $J = 9.0$  Hz), 6.88 (s, 1H), 6.76 (s, 1H), 6.67 (s, 1H), 5.19 – 5.15 (m, 1H), 3.69 – 3.17 (m, 20H), 2.90 – 2.85 (m, 1H), 2.27 (s, 3H), 2.21 – 2.10 (m, 2H), 1.77 – 1.20 (m, 10H).  $^{13}\text{C}$  NMR (125 MHz,  $\text{D}_2\text{O}$ ):  $\delta$  ppm 172.29, 172.09, 154.98, 149.27, 140.68, 137.28, 135.22, 126.87, 126.32, 126.07, 120.83, 119.95, 112.63, 112.53, 75.67, 50.52, 46.70, 44.28, 42.84, 36.40, 32.82, 32.75, 30.50, 26.42, 26.38, 25.81, 20.64, 13.22. HRMS (ESI)  $m/z$  calculated for  $\text{C}_{32}\text{H}_{45}\text{N}_5\text{O}_3$  ( $\text{M}+\text{H}$ ) $^+$  = 560.3601, found 560.3604.

**(S)-(4-(3-Cyclohexyl-4-(pyrrolidin-3-yloxy) benzoyl) piperazin-1-yl) (3-(piperazin-1-yl)-5-(trifluoromethyl) phenyl) methanone hydrochloride (21).** The synthesis of compound **21** followed the same procedure as for compound **3** to afford white solid (0.103 g, 85% yield).  $^1\text{H}$  NMR (500 MHz,  $d^6$ -DMSO):  $\delta$  ppm 9.49 (brs, 2H), 9.26 (brs, 2H), 7.31 (s, 1H), 7.25 – 7.23 (m, 3H), 7.12 (s, 1H), 7.00 (d, 1H,  $J = 9.0$  Hz), 5.18 – 5.15 (m, 1H), 3.69 – 3.18 (m, 20H), 2.90 – 2.86 (m, 1H), 2.19 – 2.12 (m, 2H), 1.76 – 1.17 (m, 10H).  $^{13}\text{C}$  NMR (125 MHz,  $\text{D}_2\text{O}$ ):  $\delta$  ppm 172.13, 170.34, 154.99, 150.67, 136.83, 136.42, 131.22 (d,  $J = 28.5$  Hz), 126.90 (d,  $J = 8.5$  Hz), 126.53, 125.65, 123.68 (d,  $J = 271.4$  Hz), 120.42, 117.89, 114.43, 112.67, 75.61, 50.45, 47.56, 46.99, 45.32, 44.23, 42.88, 42.33, 41.88, 36.28, 32.81, 32.72, 30.51, 26.39, 26.36, 25.84. HRMS (ESI)  $m/z$  calculated for  $\text{C}_{33}\text{H}_{42}\text{F}_3\text{N}_5\text{O}_3$  ( $\text{M}+\text{H}$ ) $^+$  = 614.3318, found 614.3319.

**(S)-(4-(3-Bromo-5-(piperazin-1-yl) benzoyl) piperazin-1-yl) (3-cyclohexyl-4-(pyrrolidin-3-yloxy) phenyl) methanone hydrochloride (22).** The synthesis of compound **22** followed the same procedure as for compound **3** to afford white solid (0.0546 g, 79% yield).  $^1\text{H}$  NMR (500 MHz,  $d^6$ -DMSO):  $\delta$  ppm 9.58 (brs, 2H), 9.30 (brs, 2H), 7.24 – 7.22 (m, 3H), 7.00 (d, 1H,  $J = 9.0$  Hz), 6.97 – 6.96 (m, 2H), 5.15 – 5.19 (m, 1H), 3.69 – 3.15 (m, 20H), 2.90 – 2.86 (m, 1H), 2.19 – 2.12 (m, 2H), 1.76 – 1.17 (m, 10H).  $^{13}\text{C}$  NMR (125 MHz,  $\text{D}_2\text{O}$ ):  $\delta$  ppm 172.27, 170.32, 154.99, 151.27, 137.14, 136.87, 126.85, 126.42, 126.06, 122.98, 120.87, 113.58, 112.62, 75.69, 71.52, 70.66, 60.24, 50.52, 45.48, 44.28, 43.19, 42.84, 36.36, 32.88, 32.81, 30.52, 26.46, 26.41, 25.89. HRMS (ESI)  $m/z$  calculated for  $\text{C}_{32}\text{H}_{42}\text{BrN}_5\text{O}_3$  ( $\text{M}+\text{H}$ ) $^+$  = 624.2549, found 624.2551.



### Supplementary References.

1. Sampietro, J.; Dahlberg, C. L.; Cho, U. S.; Hinds, T. R.; Kimelman, D.; Xu, W. Crystal structure of a  $\beta$ -catenin/BCL9/Tcf4 complex. *Mol. Cell* **2006**, *24* (2), 293–300.
2. Baell, J. B.; Holloway, G. A. New substructure filters for removal of pan assay interference compounds (PAINS) from screening libraries and for their exclusion in bioassays. *J. Med. Chem.* **2010**, *53*, 2719–2740.
3. Baell, J.; Walters, M. A. Chemistry: Chemical con artists foil drug discovery. *Nature* **2014**, *513*, 481–483.
4. Everson, D. A.; Jones, B. A.; Weix, D. J. Replacing conventional carbon nucleophiles with electrophiles: nickel-catalyzed reductive alkylation of aryl bromides and chlorides. *J. Am. Chem. Soc.* **2012**, *134*, 6146–6159.
5. Hoggard, L. R.; Zhang, Y.; Zhang, M.; Panic, V.; Wisniewski, J. A.; Ji, H. Rational design of selective small-molecule inhibitors for catenin/B-cell lymphoma 9 protein–protein interactions. *J. Am. Chem. Soc.* **2015**, *137*, 12249–12260.
6. Zhang, M.; Wisniewski, J. A.; Ji, H. AlphaScreen selectivity assay for  $\beta$ -catenin/B-cell lymphoma 9 inhibitors. *Anal. Biochem.* **2015**, *469*, 43–53.

## HPLC conditions

The purity of final compounds **2–22** was determined by HPLC analysis. The instrument was an Agilent 1260 Infinity Quaternary LC with an Agilent 1260 Infinity ELSD detector. The purity of all tested compounds was  $\geq 90\%$ . Some HPLC traces are shown below.

**Compound 3, condition A.** Elute with 0.1% TFA in water for first 5 minutes, and then change to a 5 minutes' gradient starting with 0.1% TFA in water and ending with 0.1% TFA in water and acetonitrile mixture (water with 0.1% TFA : acetonitrile = 1 : 1), and at last eluent with 0.1% TFA in water and acetonitrile 1 : 1 mixture for 10 minutes.

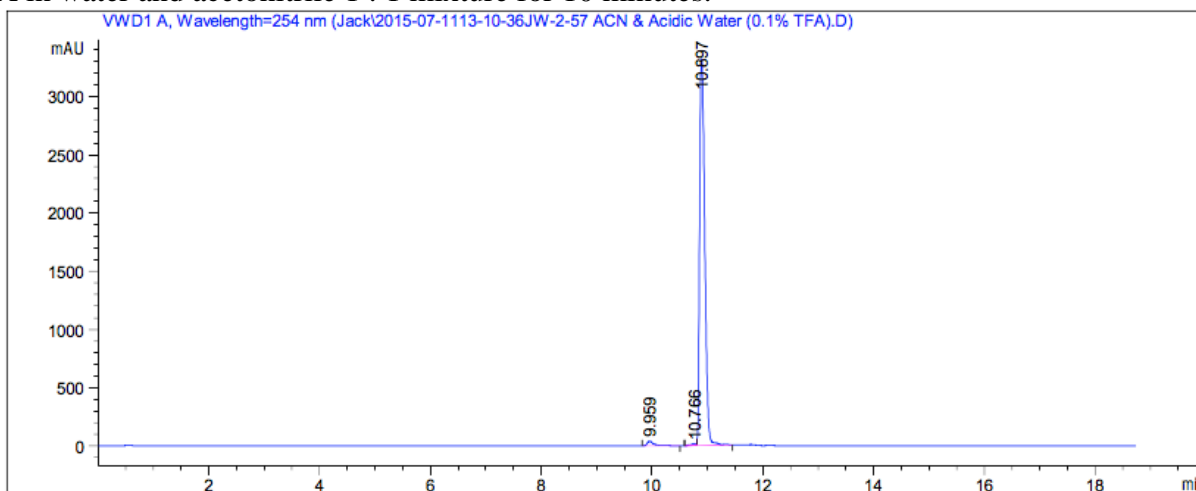

=====  
Area Percent Report  
=====

Sorted By : Signal  
Multiplier : 1.0000  
Dilution : 1.0000  
Do not use Multiplier & Dilution Factor with ISTDs

Signal 1: VWD1 A, Wavelength=254 nm

| Peak # | RetTime [min] | Type | Width [min] | Area [mAU*s] | Height [mAU] | Area %  |
|--------|---------------|------|-------------|--------------|--------------|---------|
| 1      | 9.959         | BV R | 0.1205      | 336.61703    | 40.71381     | 1.5455  |
| 2      | 10.766        | BV E | 0.0987      | 104.32155    | 14.71576     | 0.4790  |
| 3      | 10.897        | VV R | 0.1010      | 2.13390e4    | 3319.21606   | 97.9755 |

Totals : 2.17799e4 3374.64563

**Compound 3, condition B.** Elute with 0.1% TFA in water for first 5 minutes, and then change to a 5 minutes' gradient starting with 0.1% TFA in water and ending with 0.1% TFA in water and acetonitrile mixture (water with 0.1% TFA : methanol = 1 : 1), and at last eluent with 0.1% TFA in water and methanol 1 : 1 mixture for 10 minutes.

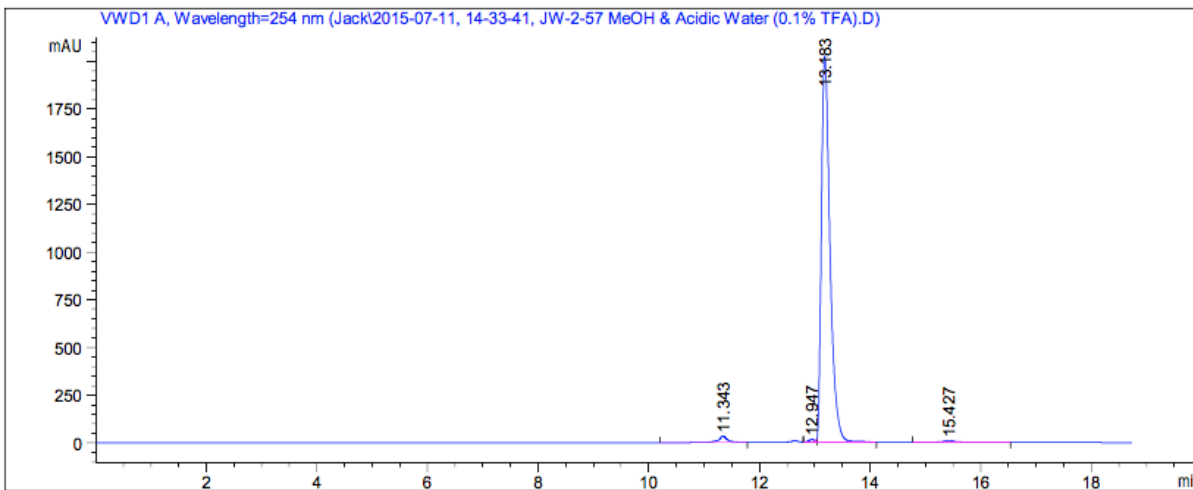

=====  
 Area Percent Report  
 =====

Sorted By : Signal  
 Multiplier : 1.0000  
 Dilution : 1.0000  
 Do not use Multiplier & Dilution Factor with ISTDs

Signal 1: VWD1 A, Wavelength=254 nm

| Peak # | RetTime [min] | Type | Width [min] | Area [mAU*s] | Height [mAU] | Area %  |
|--------|---------------|------|-------------|--------------|--------------|---------|
| 1      | 11.343        | VB R | 0.1772      | 435.82422    | 34.08990     | 1.9267  |
| 2      | 12.947        | BV E | 0.1104      | 98.32527     | 13.92175     | 0.4347  |
| 3      | 13.183        | VV R | 0.1643      | 2.18855e4    | 2021.41760   | 96.7519 |
| 4      | 15.427        | VV R | 0.2950      | 200.57608    | 9.47480      | 0.8867  |

Totals : 2.26202e4 2078.90404

**Compound 11, condition A.** Elute with 0.1% TFA in water for first 8 minutes, and then change to a 2 minutes' gradient starting with 0.1% TFA in water and ending with 0.1% TFA in water and acetonitrile mixture (water with 0.1% TFA : acetonitrile = 1 : 1), and later eluent with 0.1% TFA in water and acetonitrile 1 : 1 mixture for 5 minutes. Then change mobile phase from the above mixture to 100% acetonitrile in 1 minute, and then keep eluting for 4 minutes.

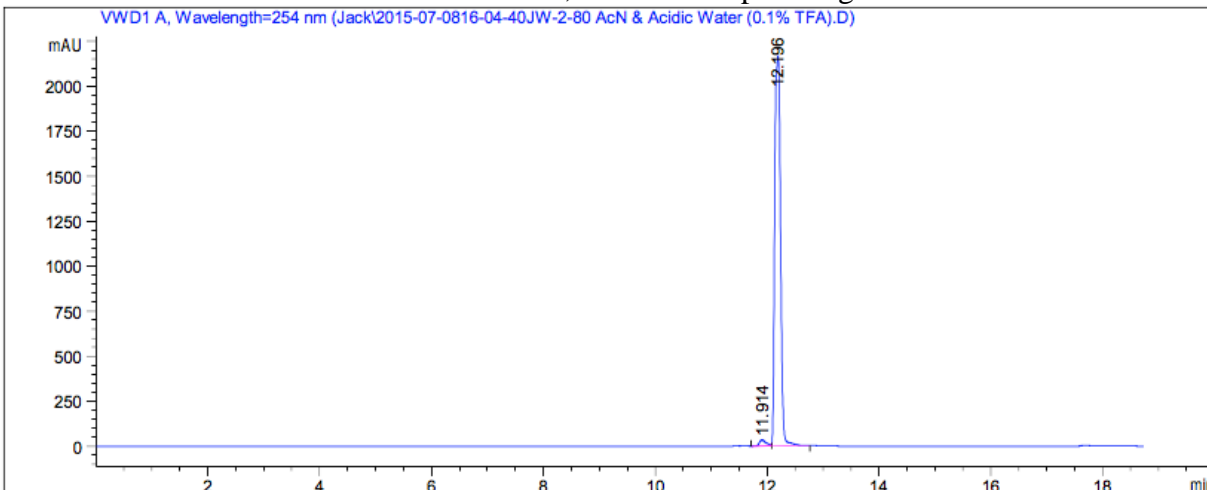

=====  
 Area Percent Report  
 =====

Sorted By : Signal  
 Multiplier : 1.0000  
 Dilution : 1.0000  
 Do not use Multiplier & Dilution Factor with ISTDs

Signal 1: VWD1 A, Wavelength=254 nm

| Peak # | RetTime [min] | Type | Width [min] | Area [mAU*s] | Height [mAU] | Area %  |
|--------|---------------|------|-------------|--------------|--------------|---------|
| 1      | 11.914        | BV E | 0.1177      | 285.71378    | 35.56657     | 1.8073  |
| 2      | 12.196        | VV R | 0.1157      | 1.55228e4    | 2164.15918   | 98.1927 |

Totals : 1.58085e4 2199.72575

**Compound 11, condition B.** Elute with 0.1% TFA in water for first 8 minutes, and then change to a 3 minutes' gradient starting with 0.1% TFA in water and ending with 0.1% TFA in water and methanol mixture (water with 0.1% TFA:methanol = 1:1), and later eluent with 0.1% TFA in water and methanol 1 : 1 mixture for 4 minutes. Then change mobile phase from the above mixture to 100% methanol in 1 minute.

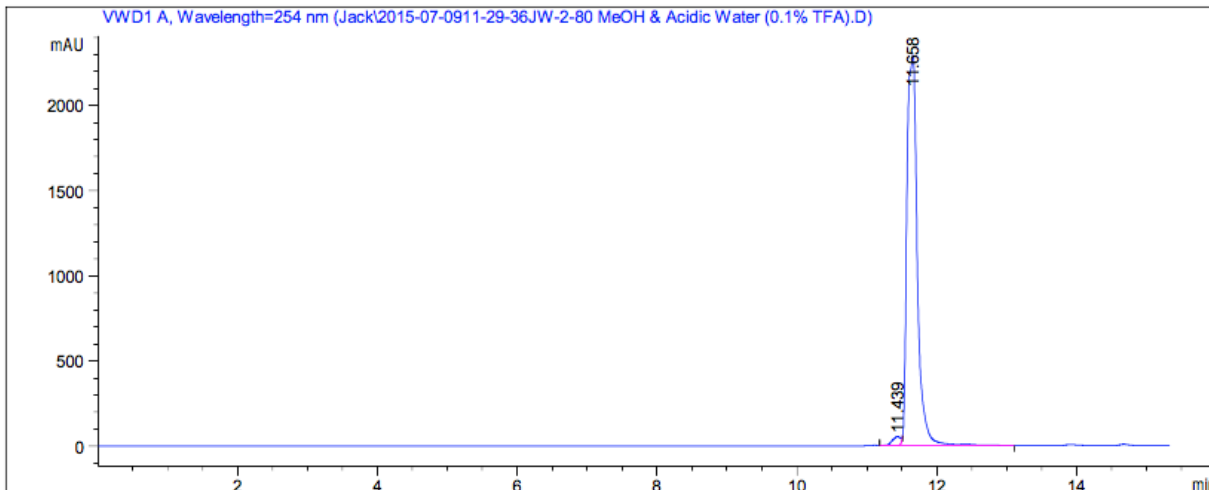

=====  
 Area Percent Report  
 =====

Sorted By : Signal  
 Multiplier : 1.0000  
 Dilution : 1.0000  
 Do not use Multiplier & Dilution Factor with ISTDs

Signal 1: VWD1 A, Wavelength=254 nm

| Peak # | RetTime [min] | Type | Width [min] | Area [mAU*s] | Height [mAU] | Area %  |
|--------|---------------|------|-------------|--------------|--------------|---------|
| 1      | 11.439        | BV E | 0.1101      | 425.59833    | 53.89672     | 1.7572  |
| 2      | 11.658        | VV R | 0.1412      | 2.37943e4    | 2290.23828   | 98.2428 |

Totals : 2.42199e4 2344.13500

# NMR Spectra

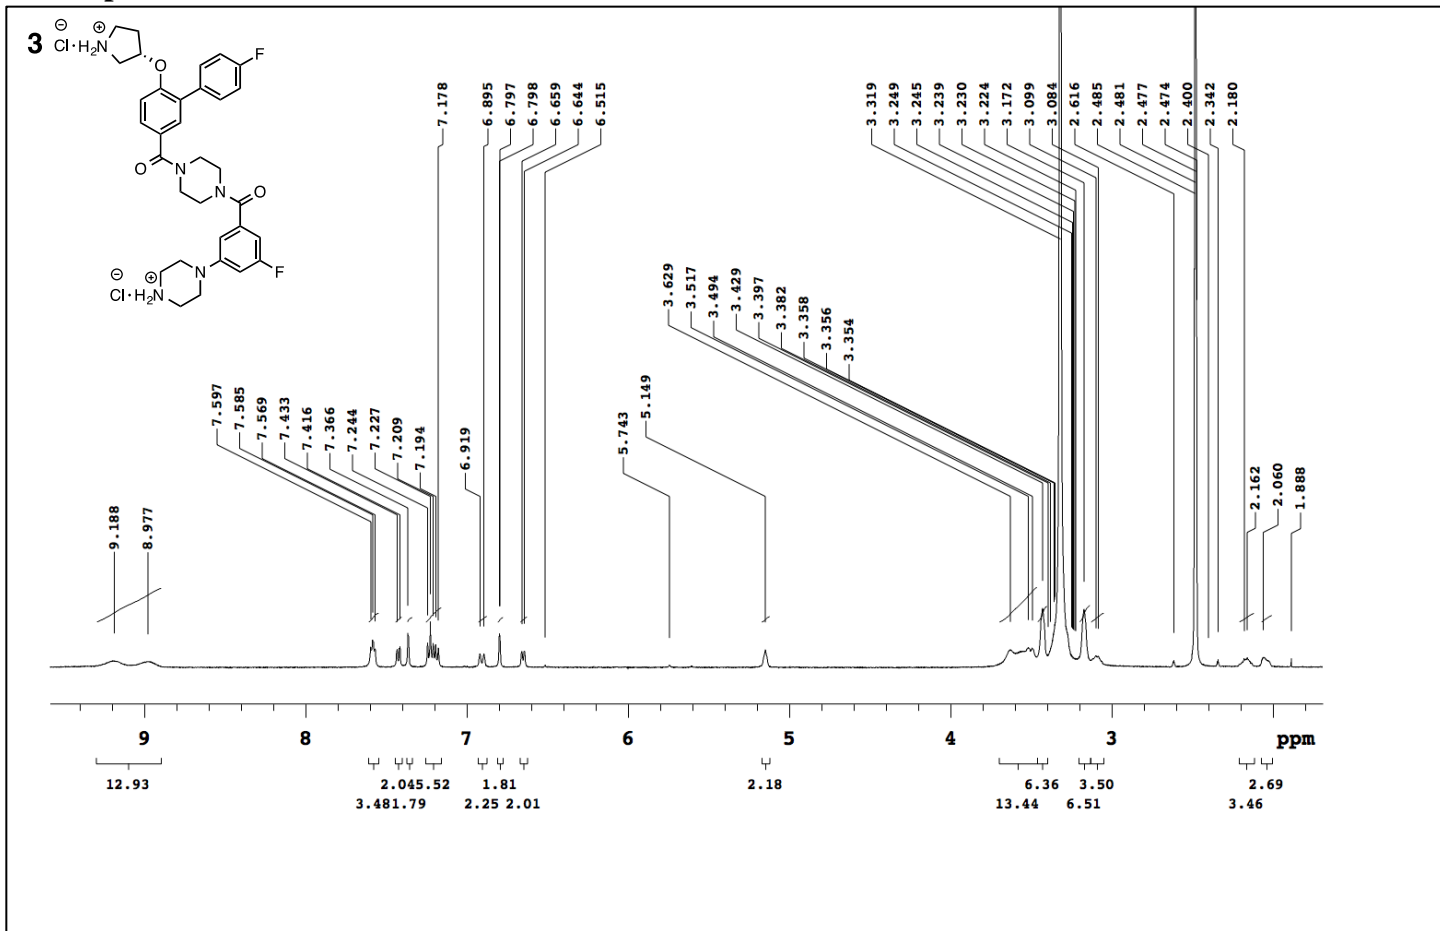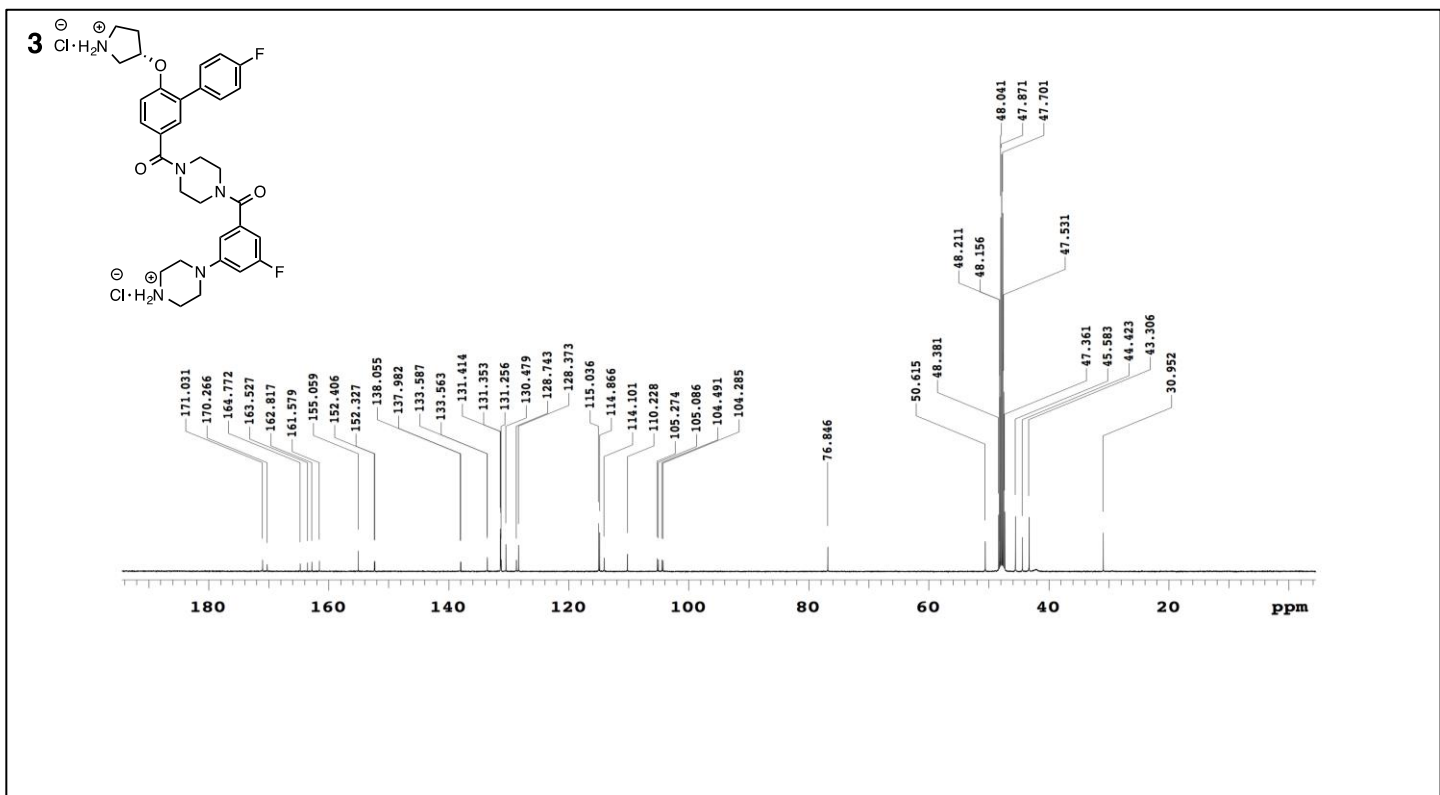

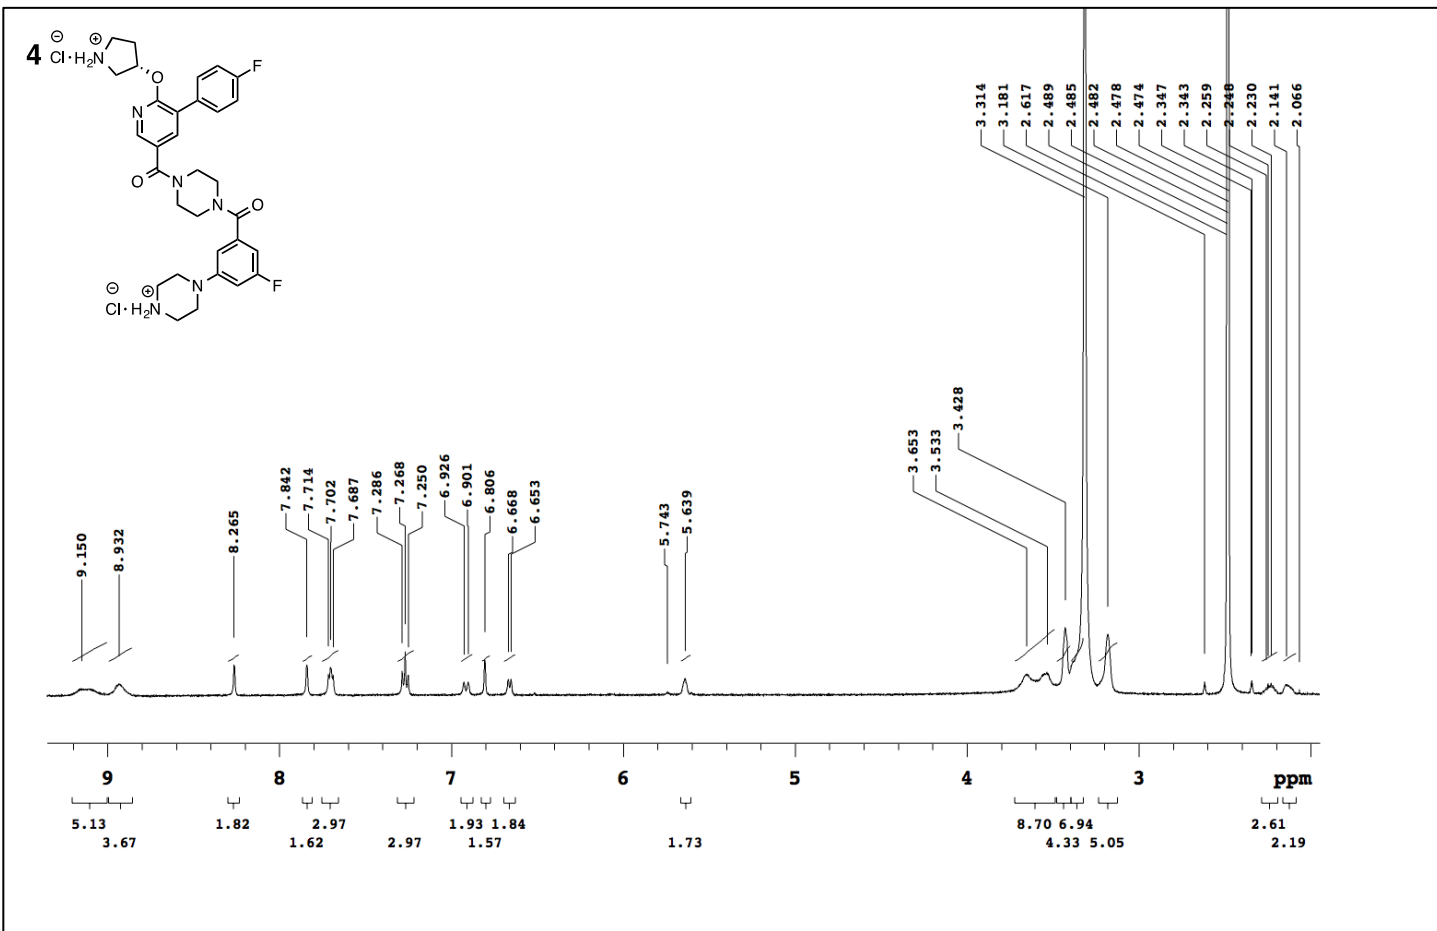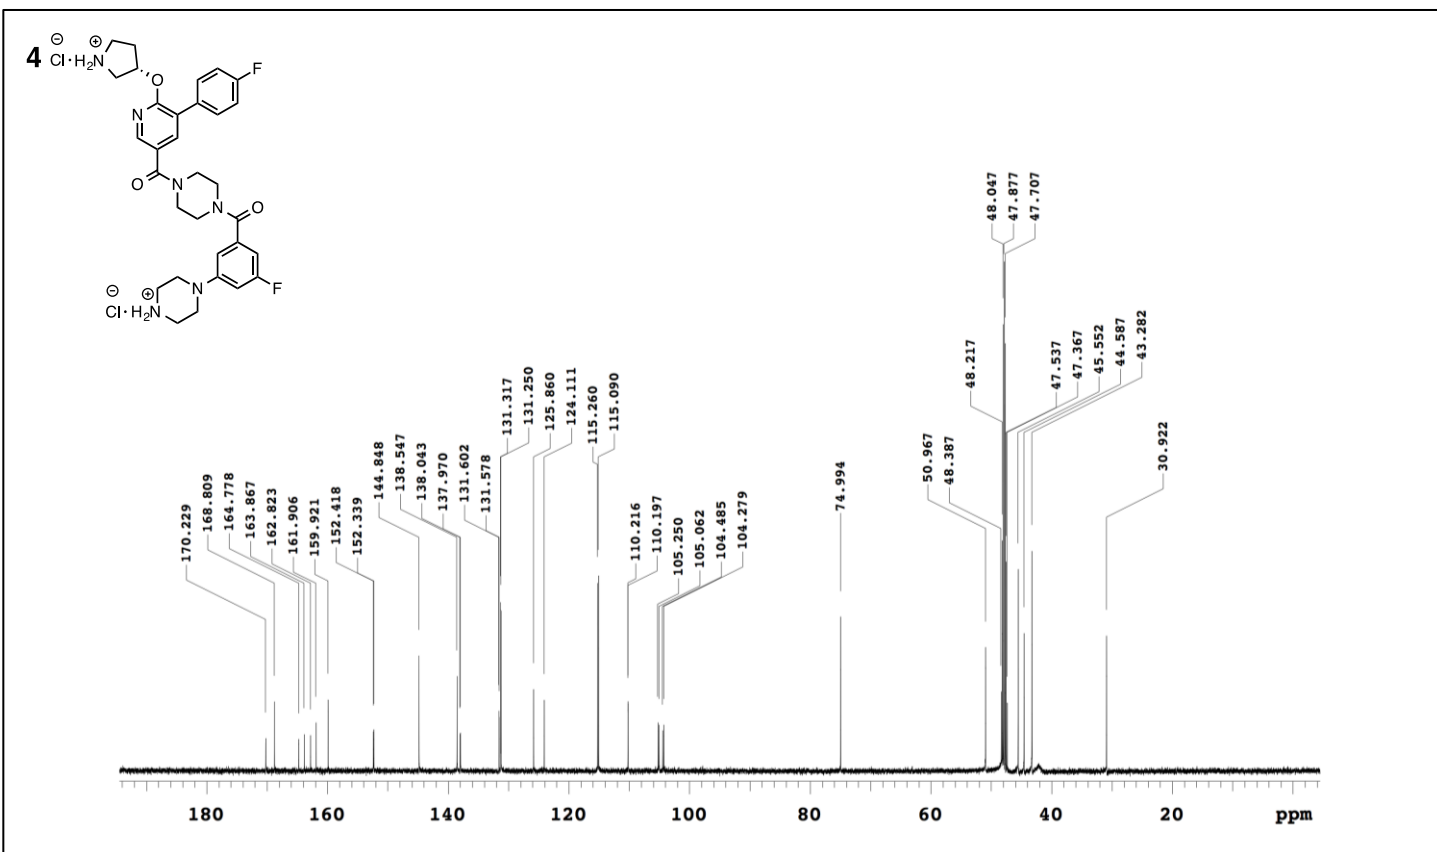

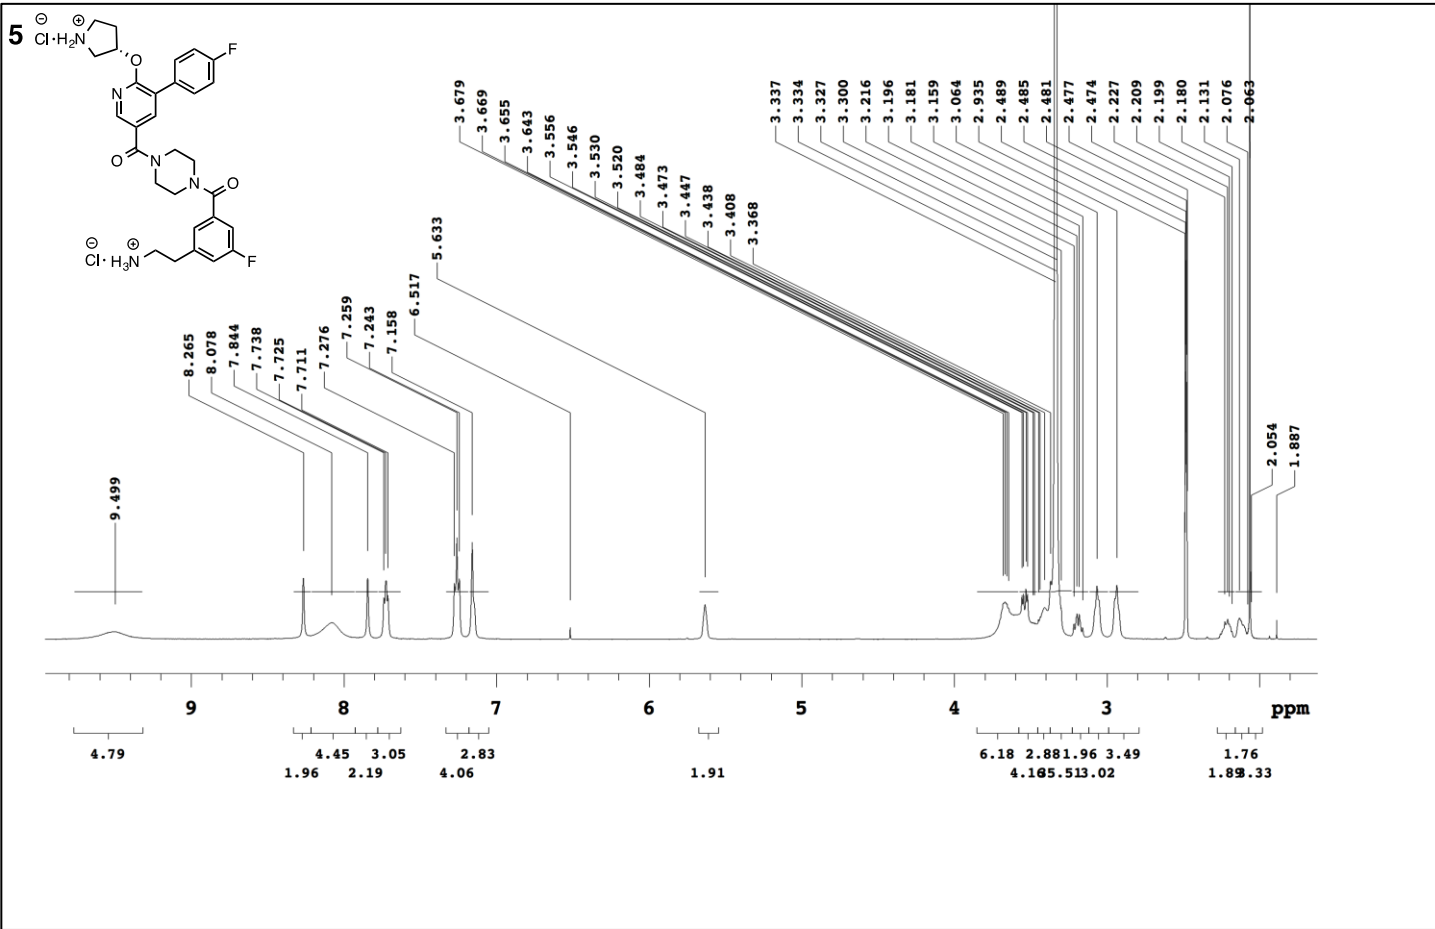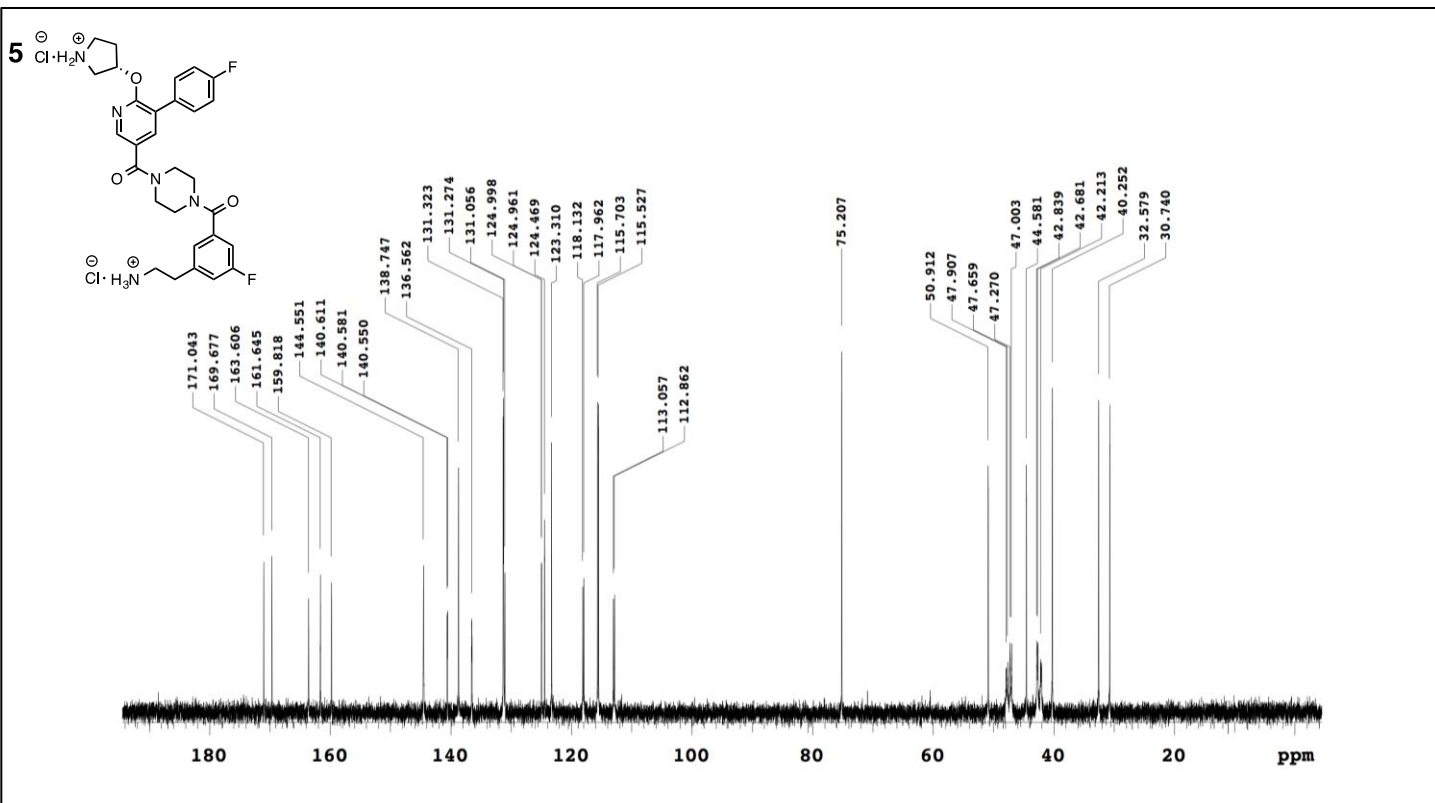



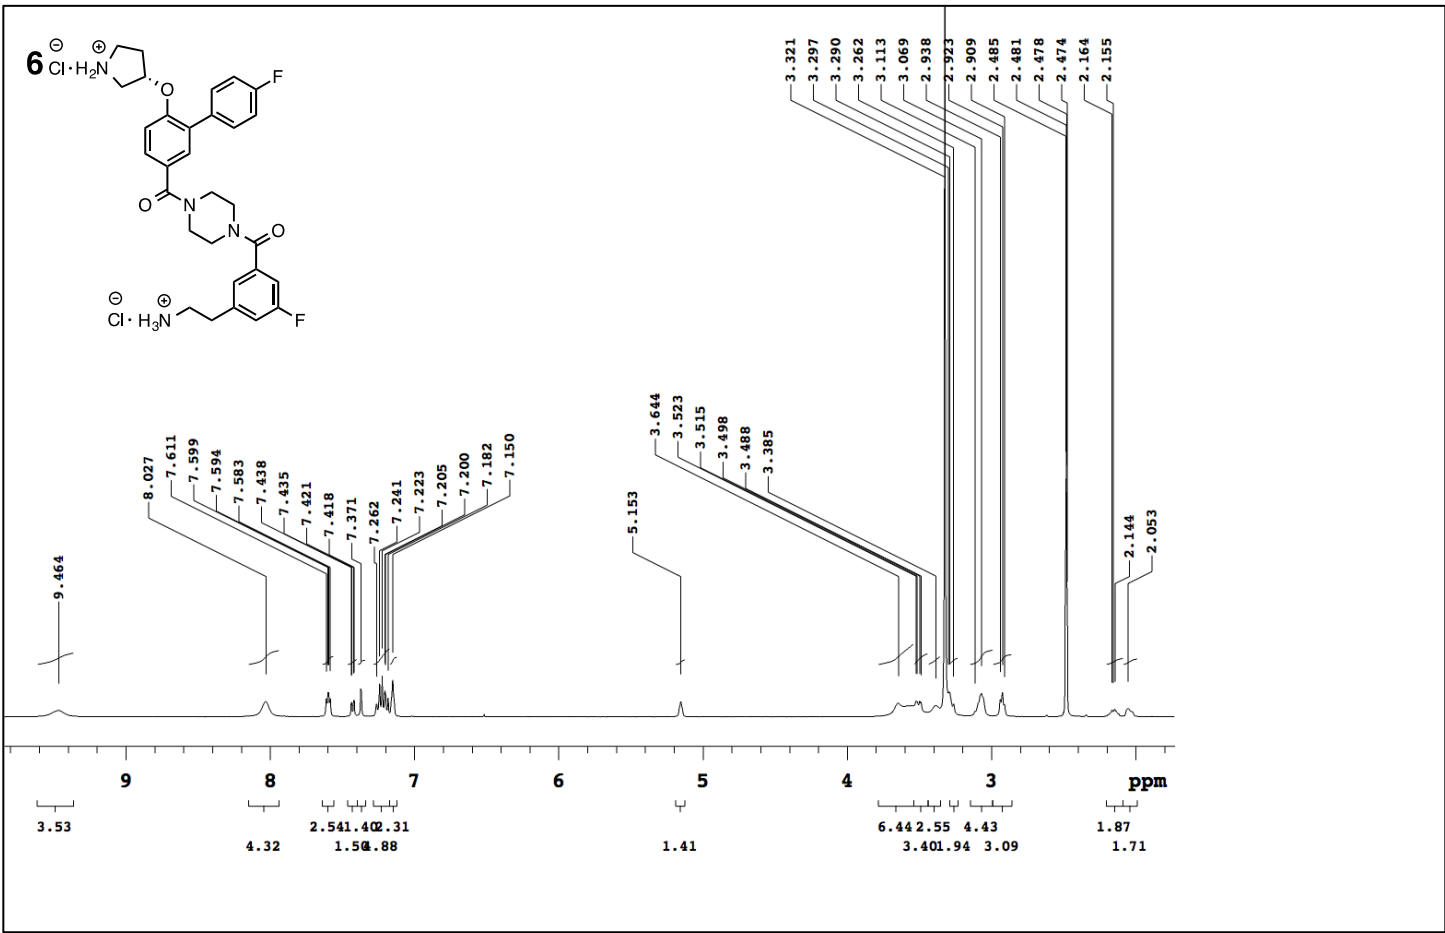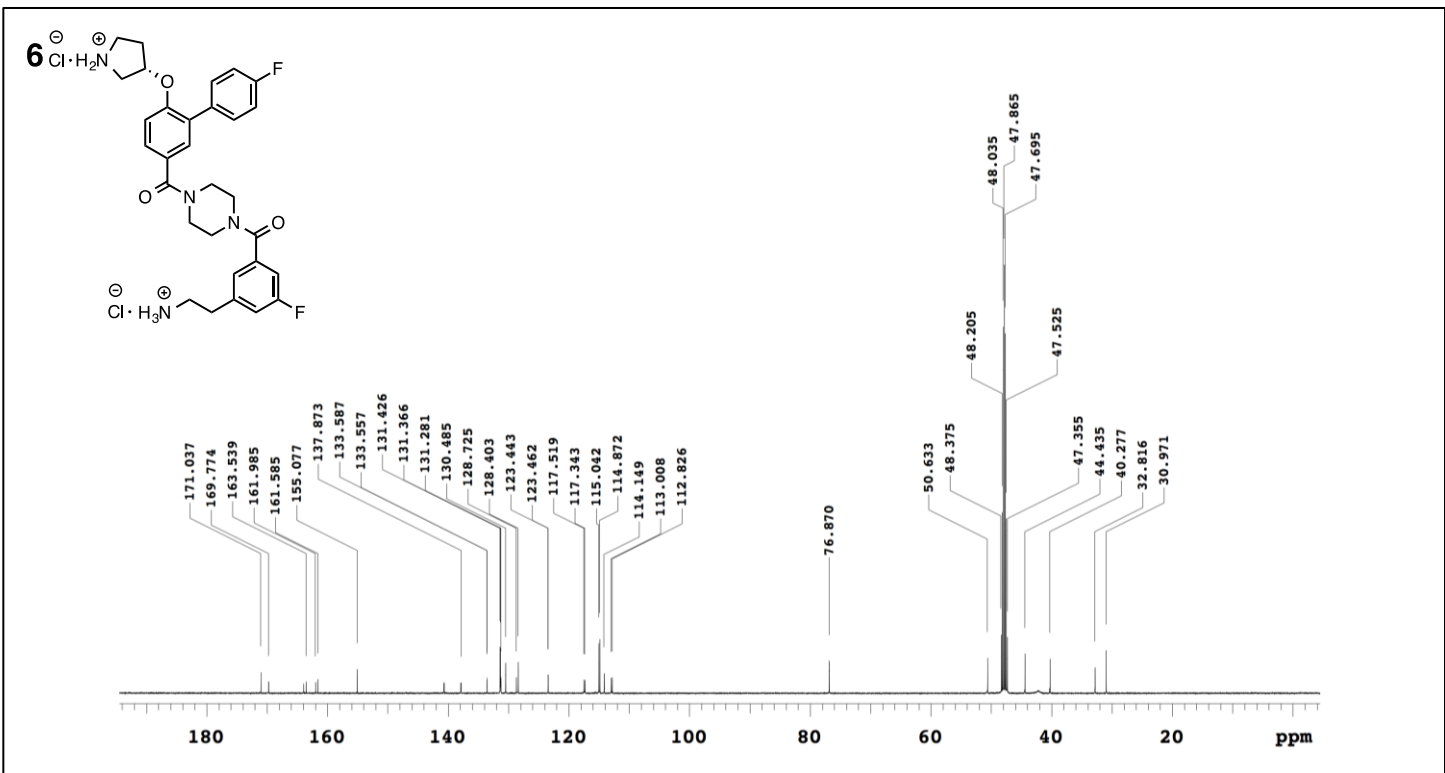

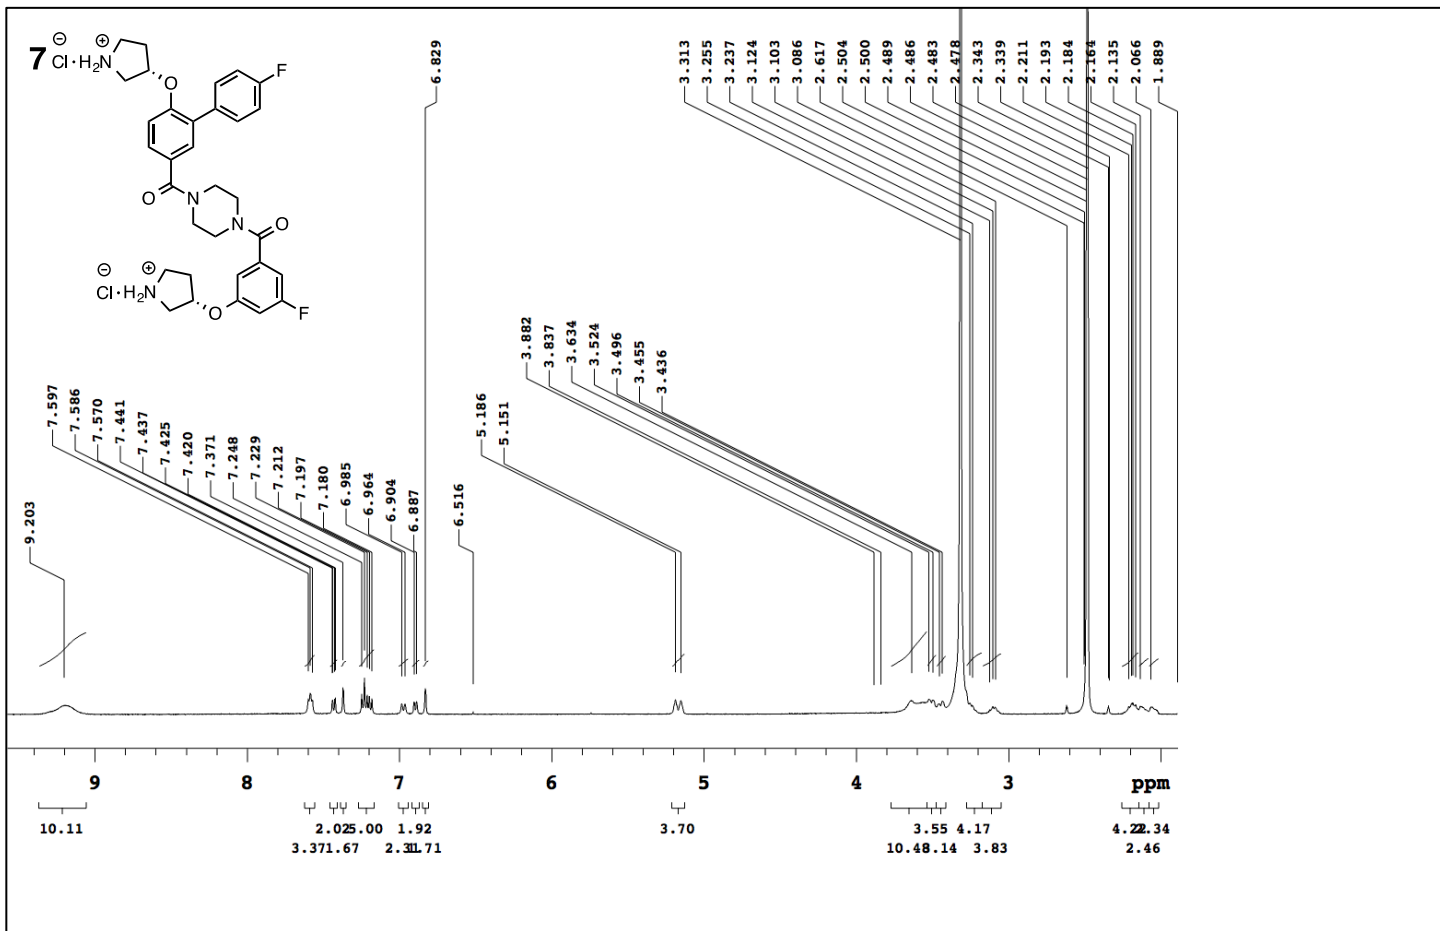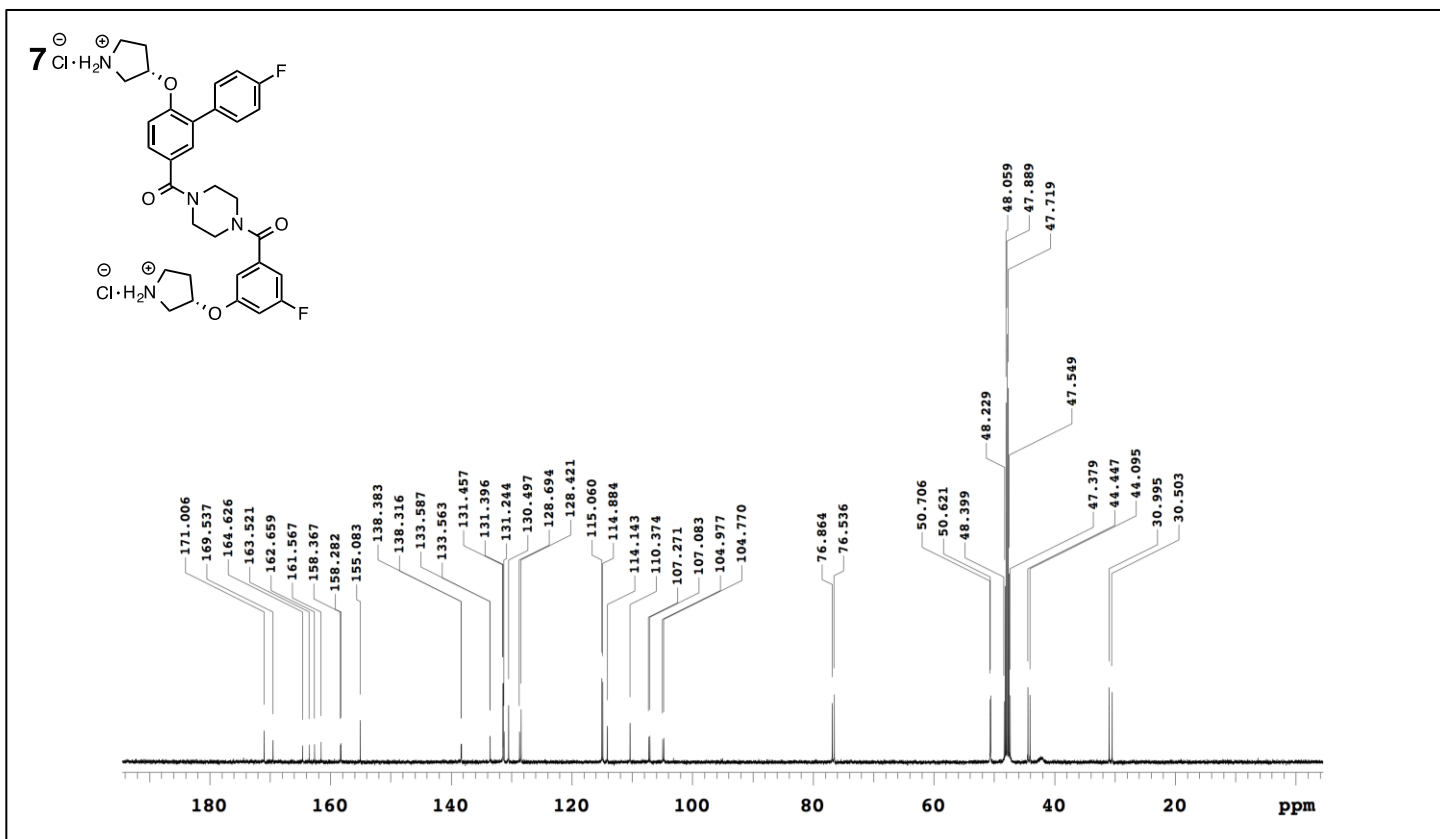

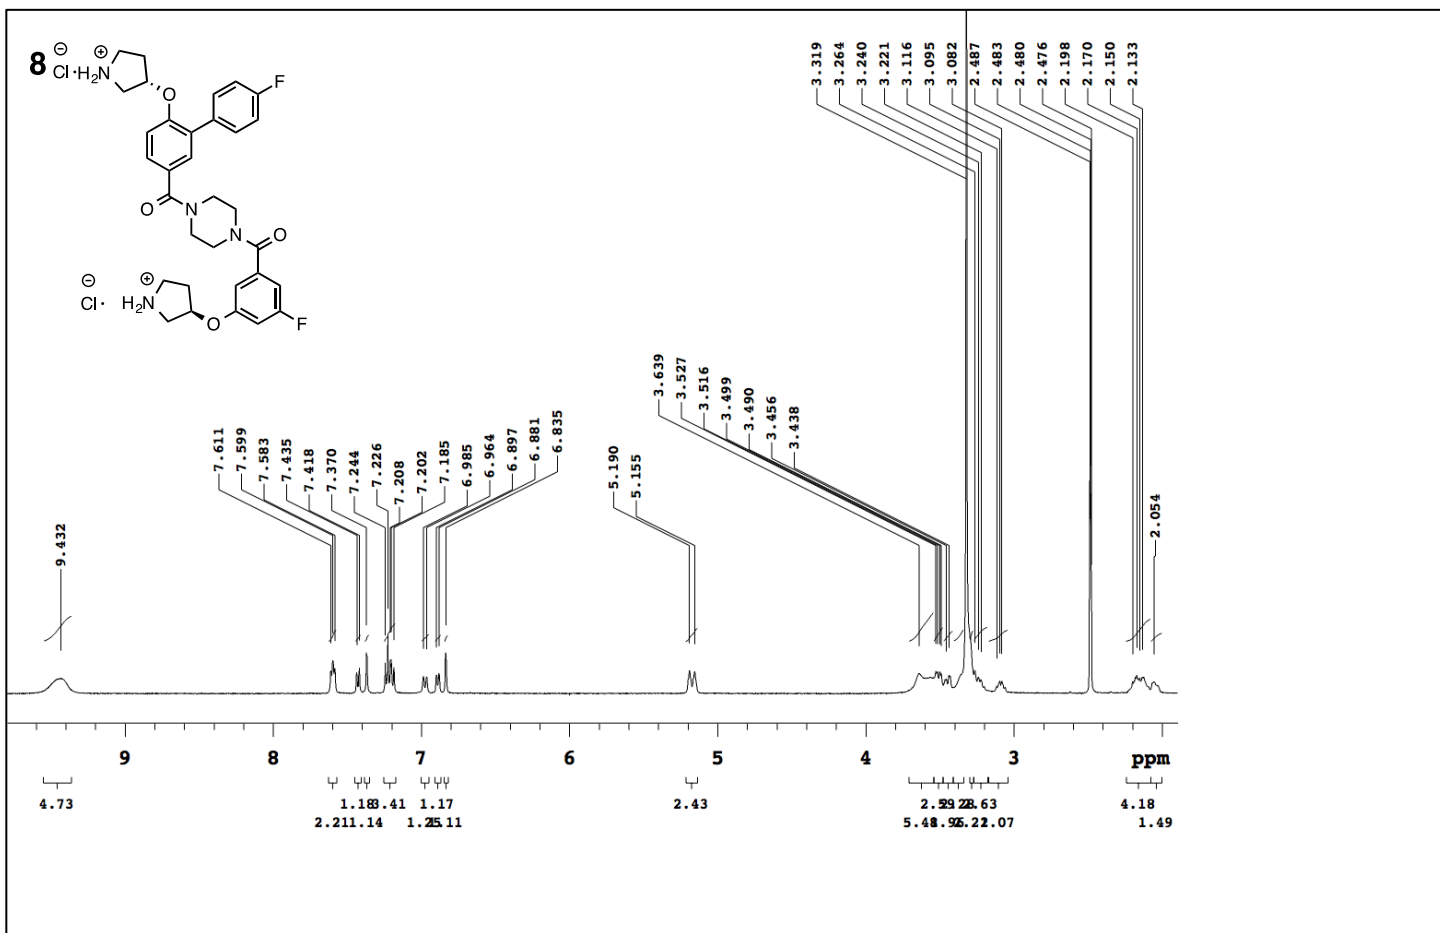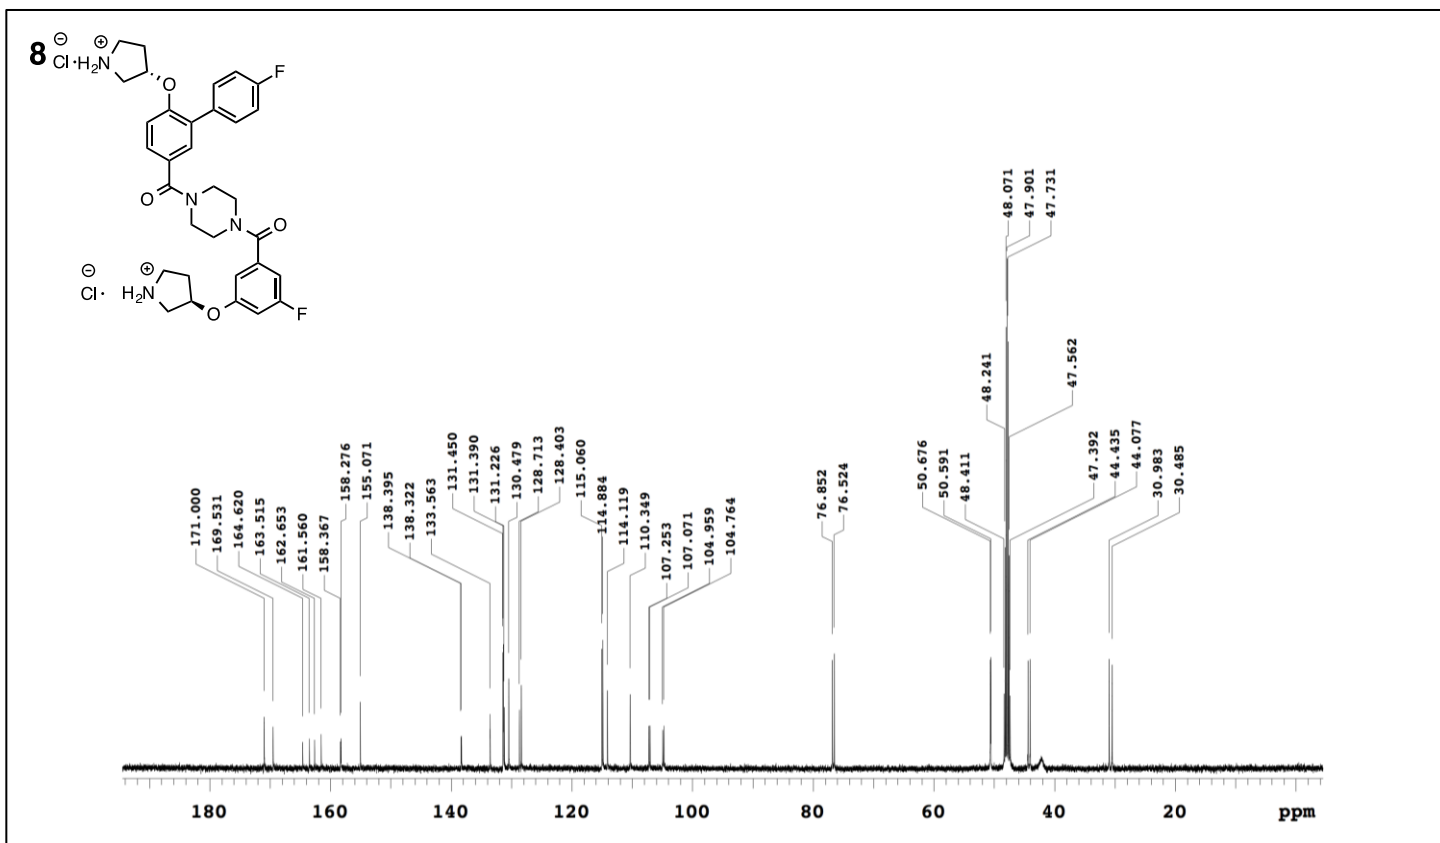

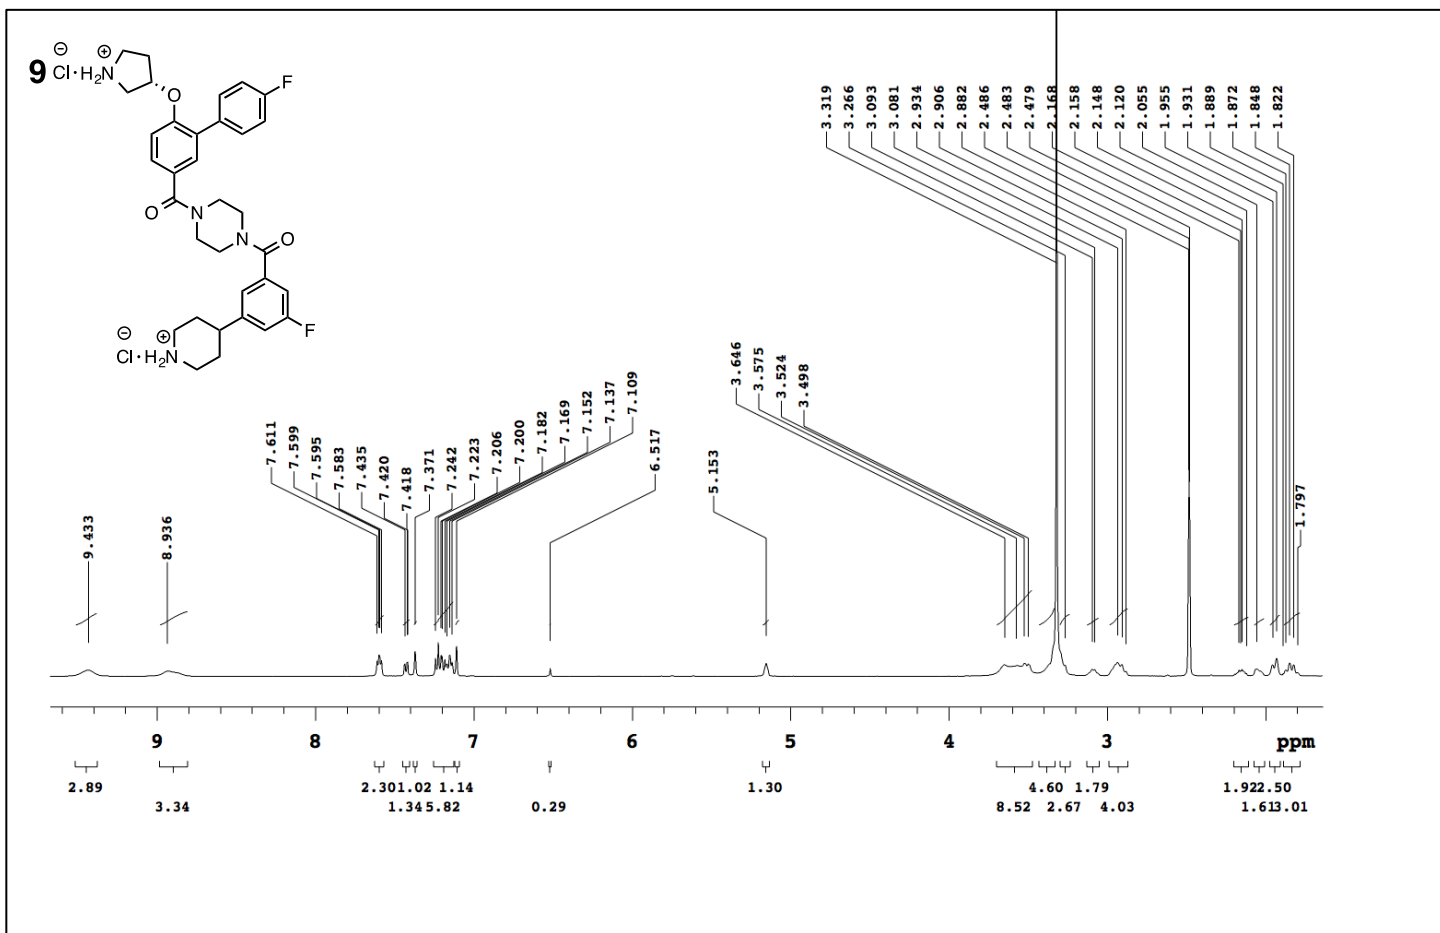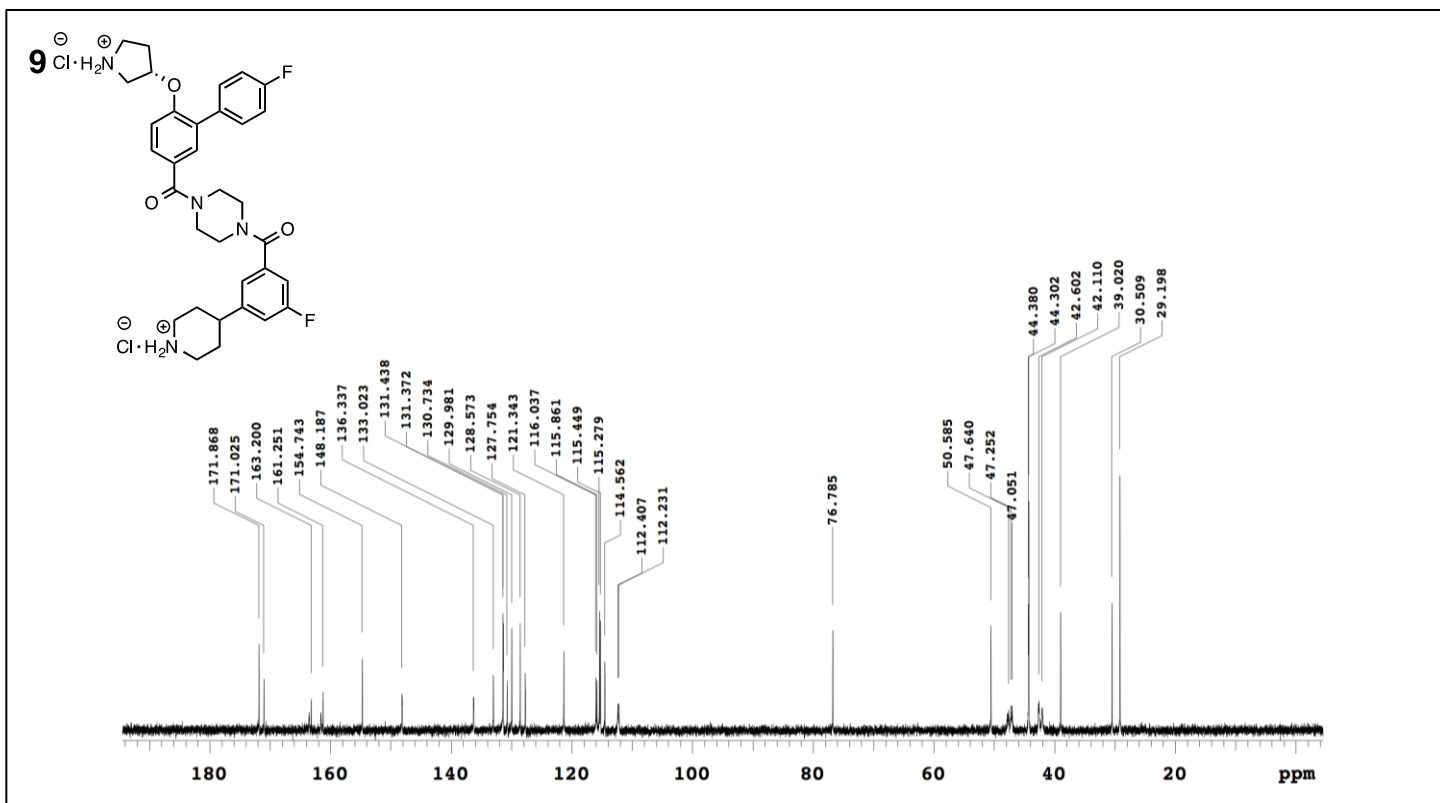

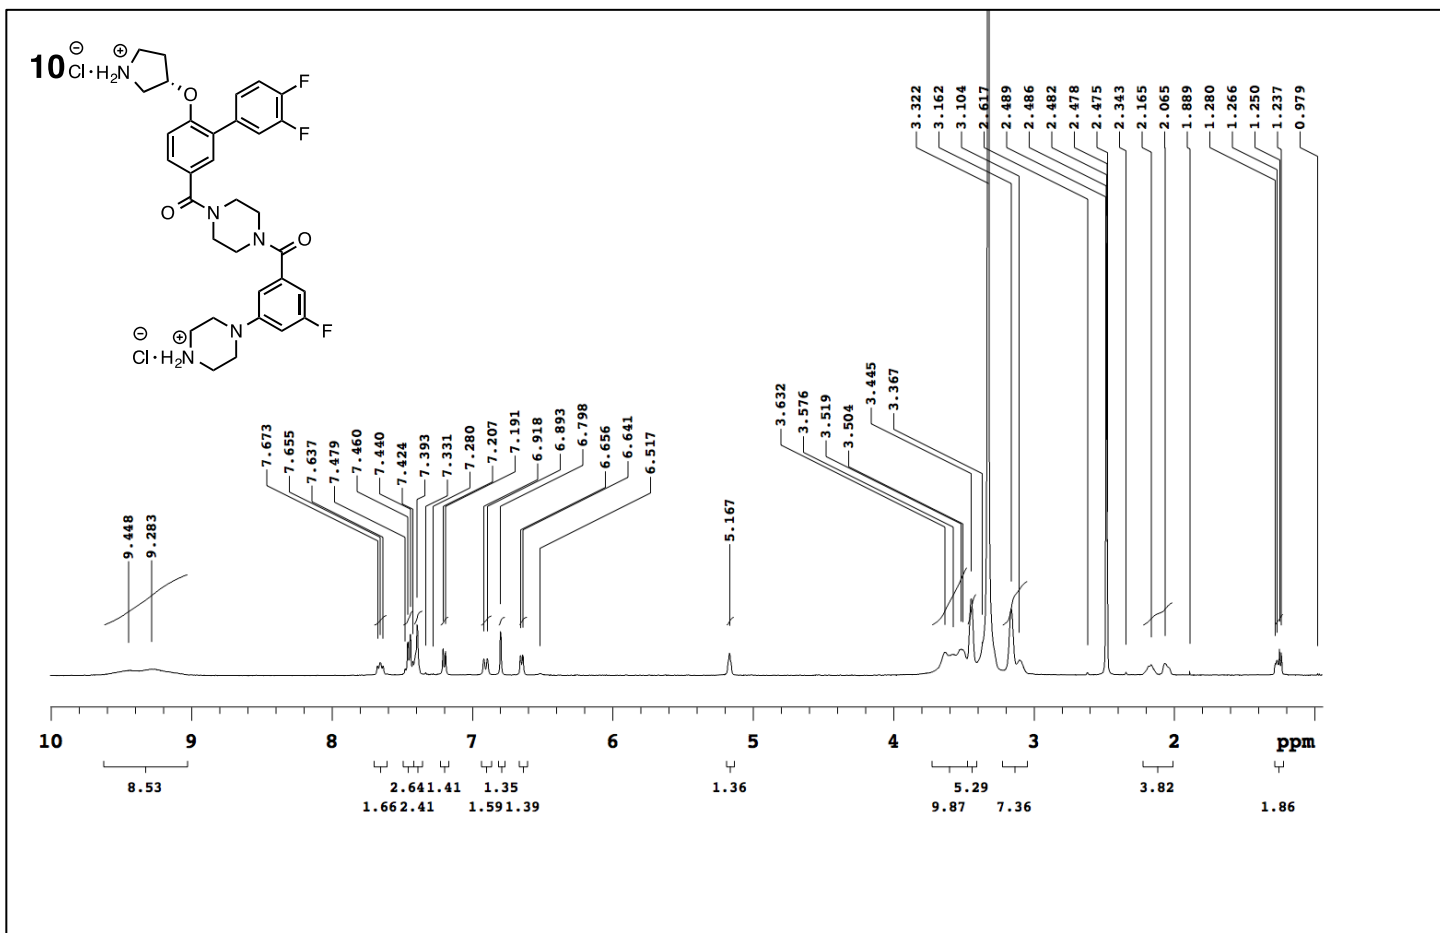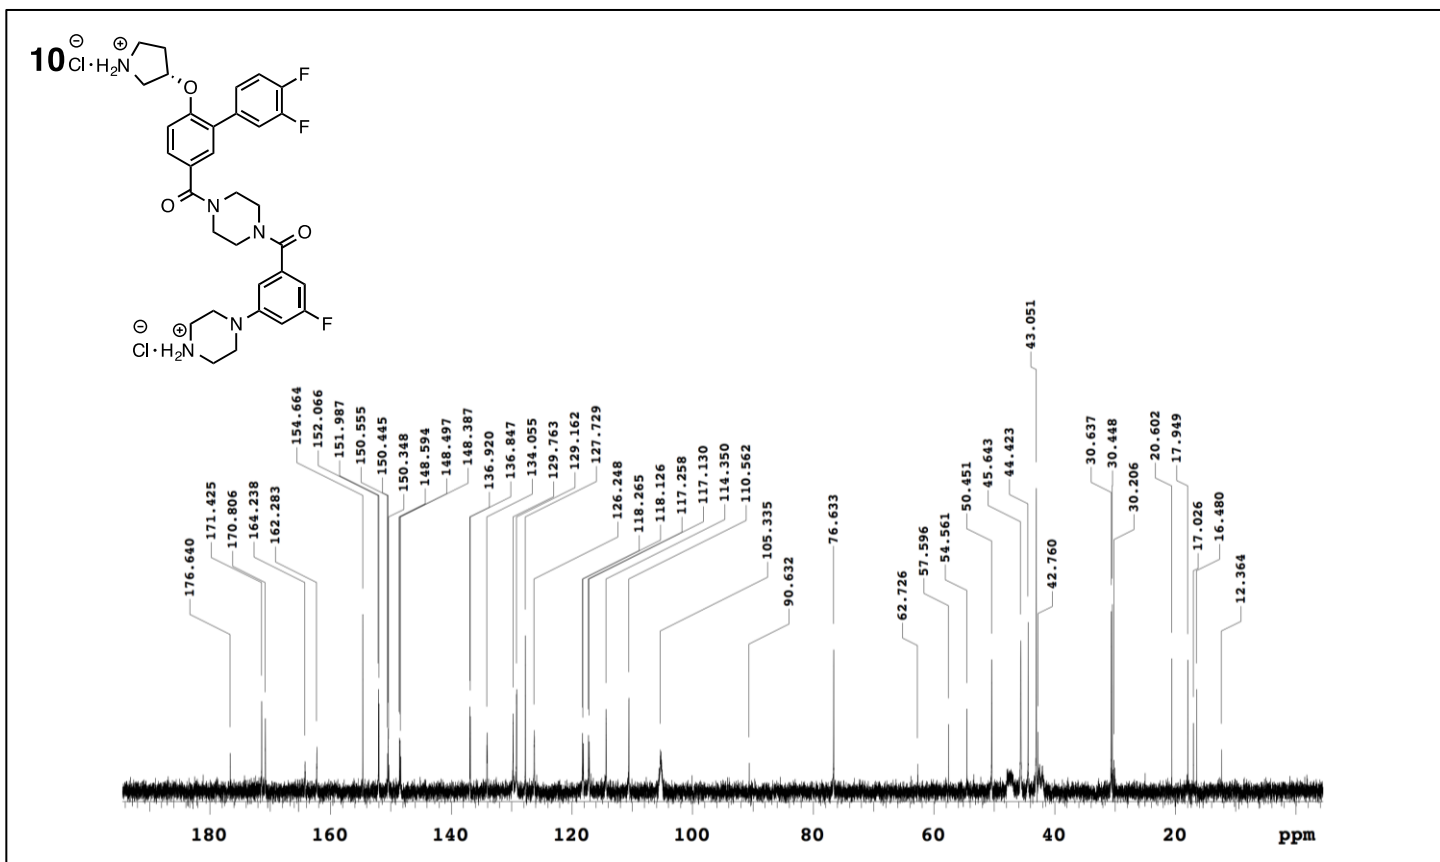

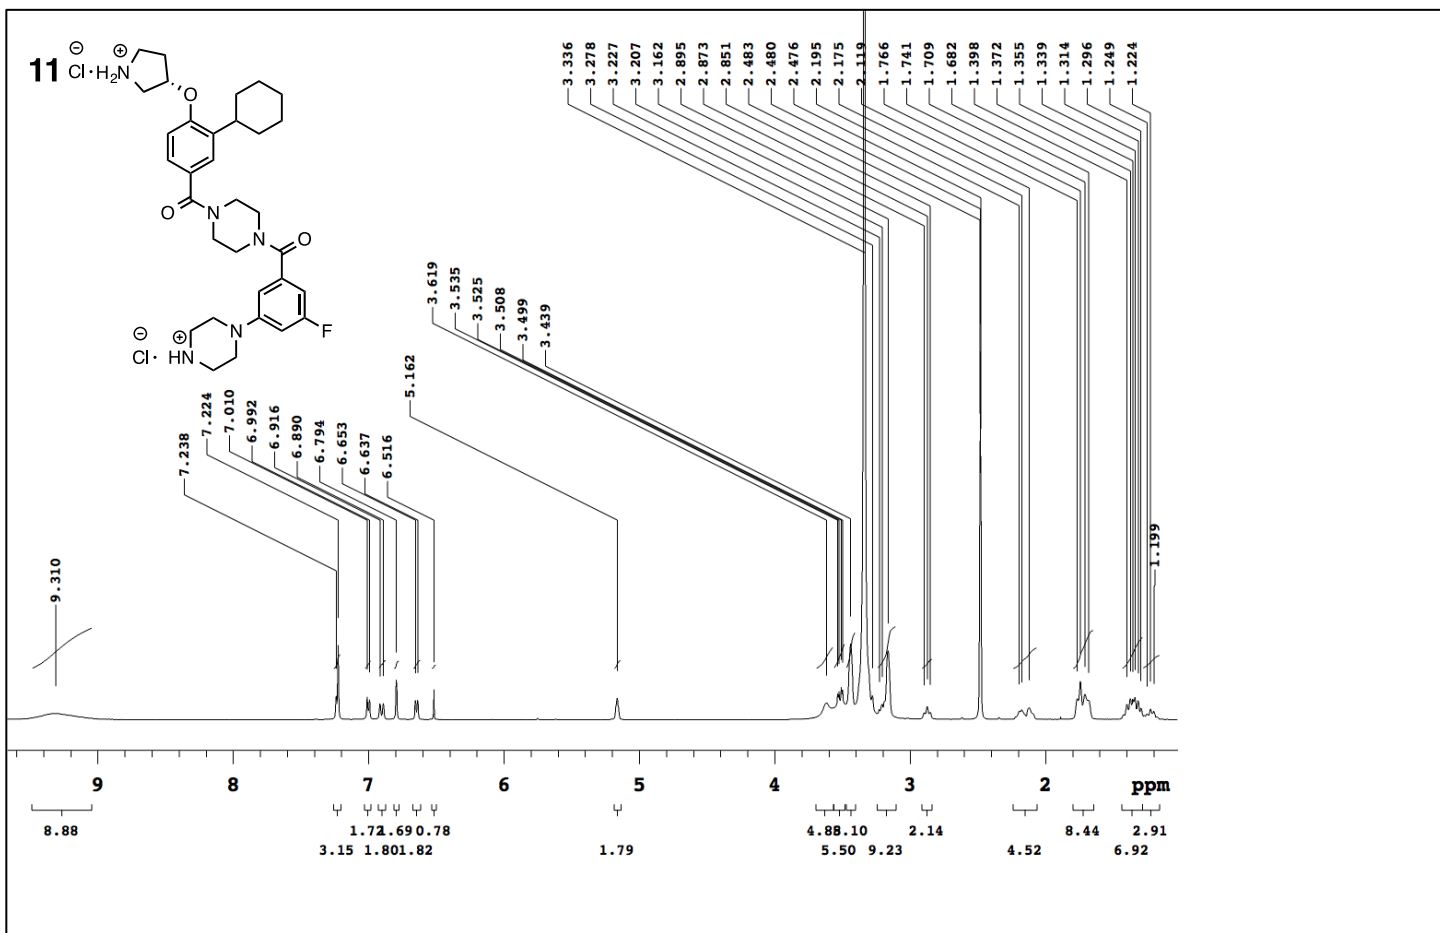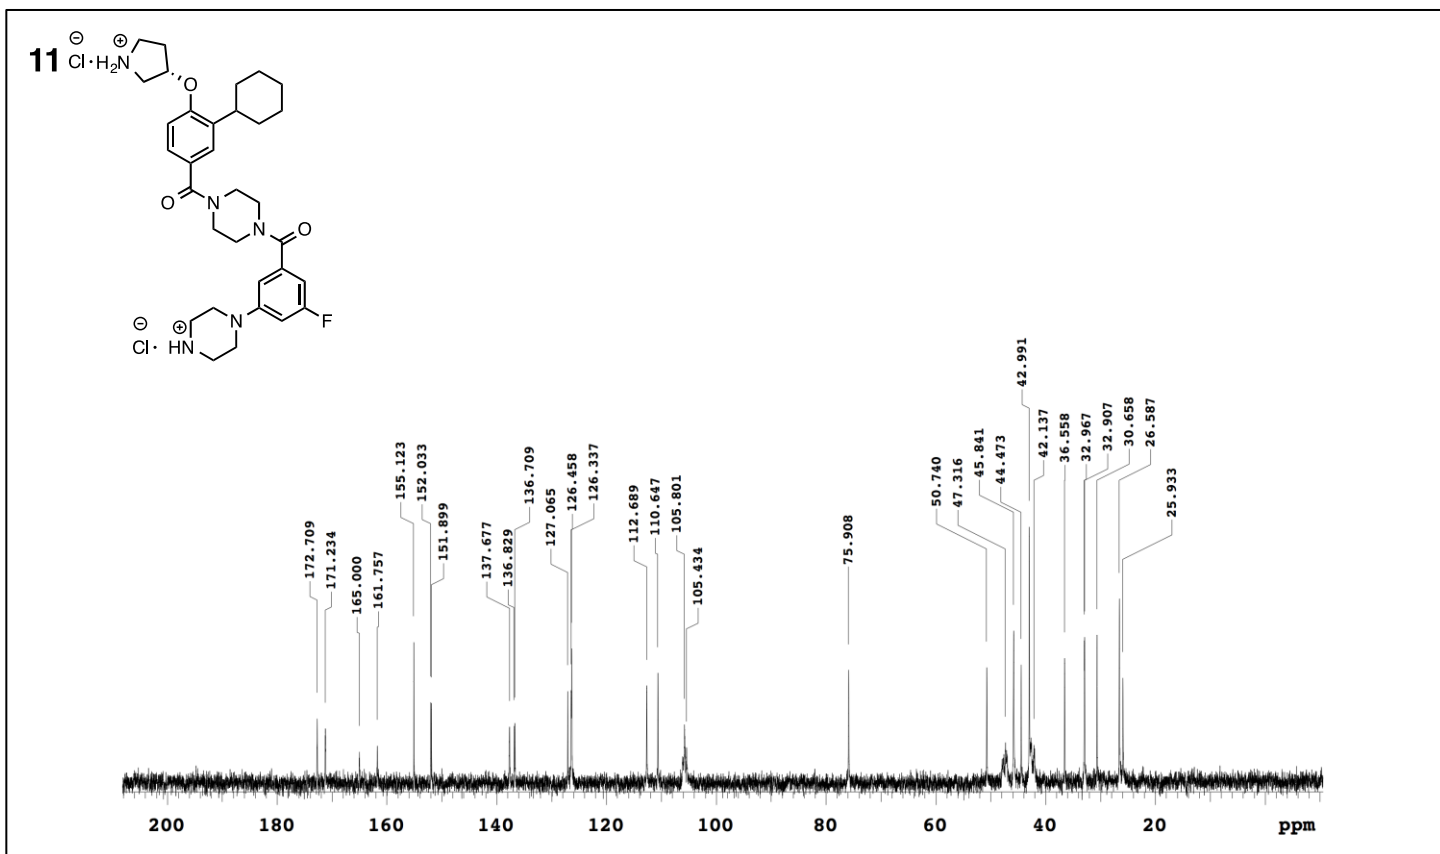

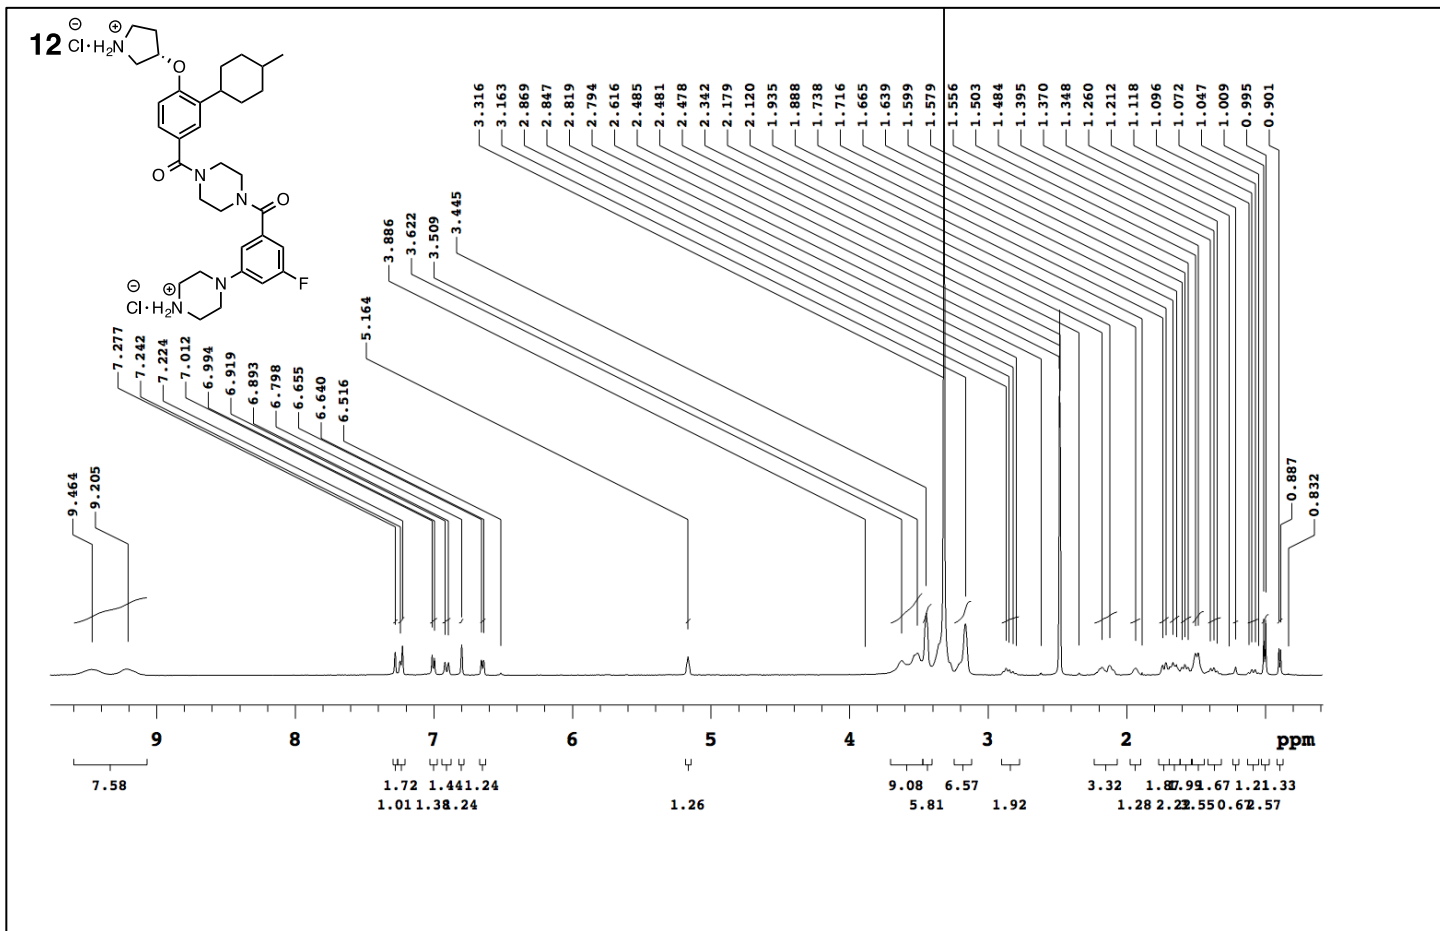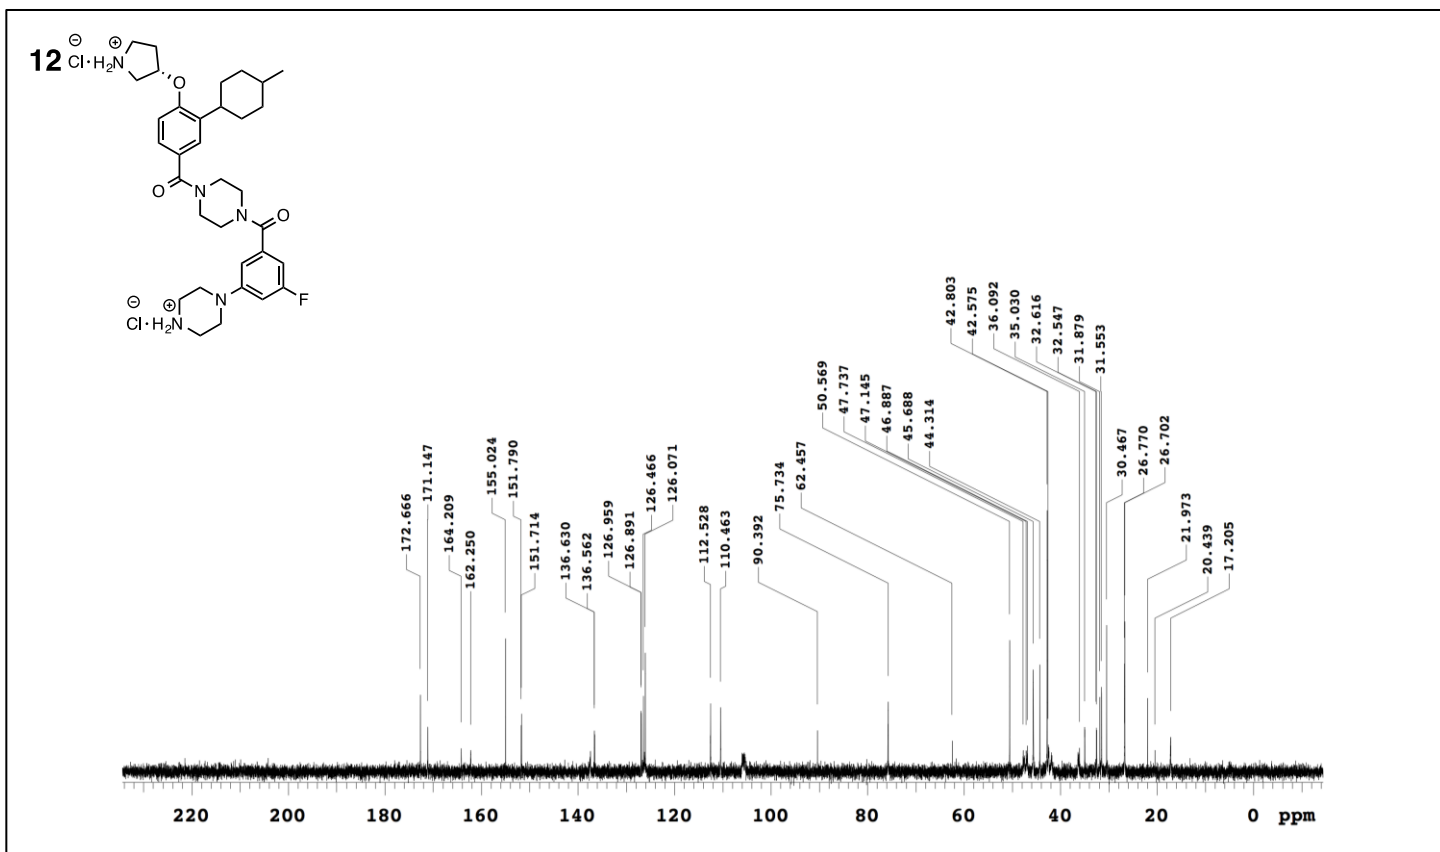

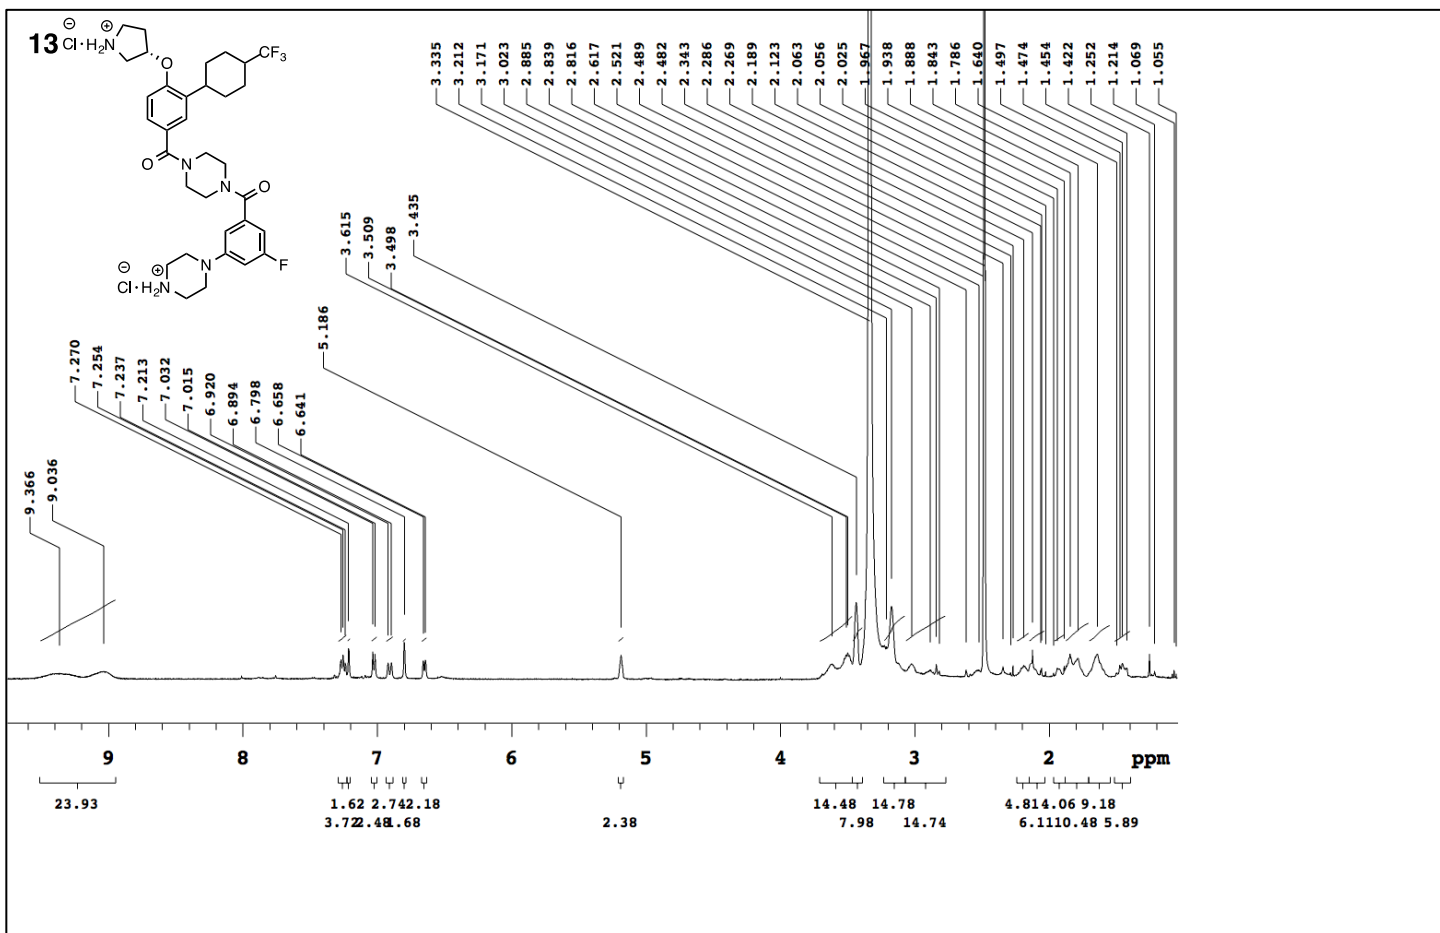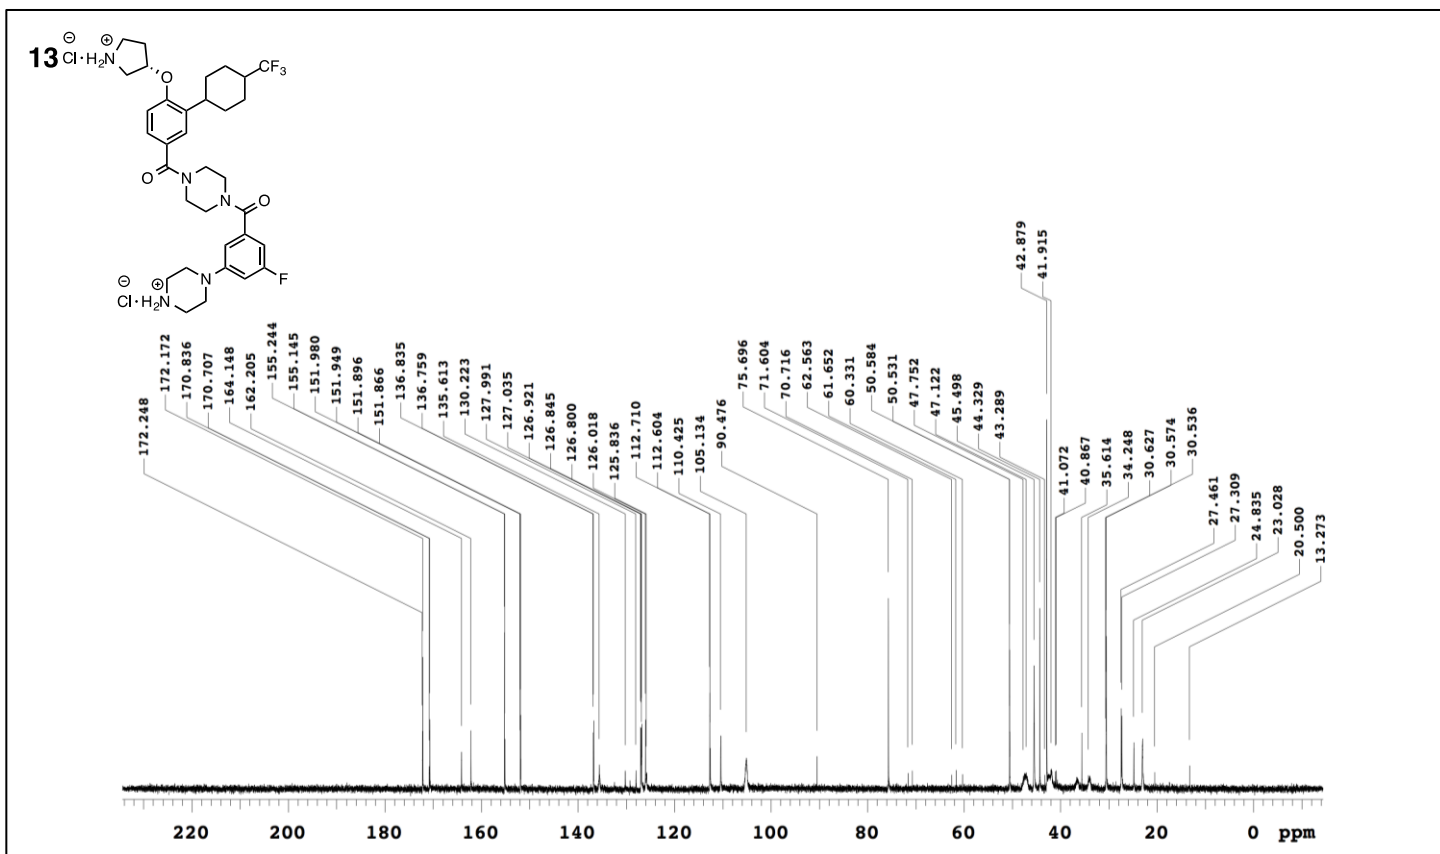



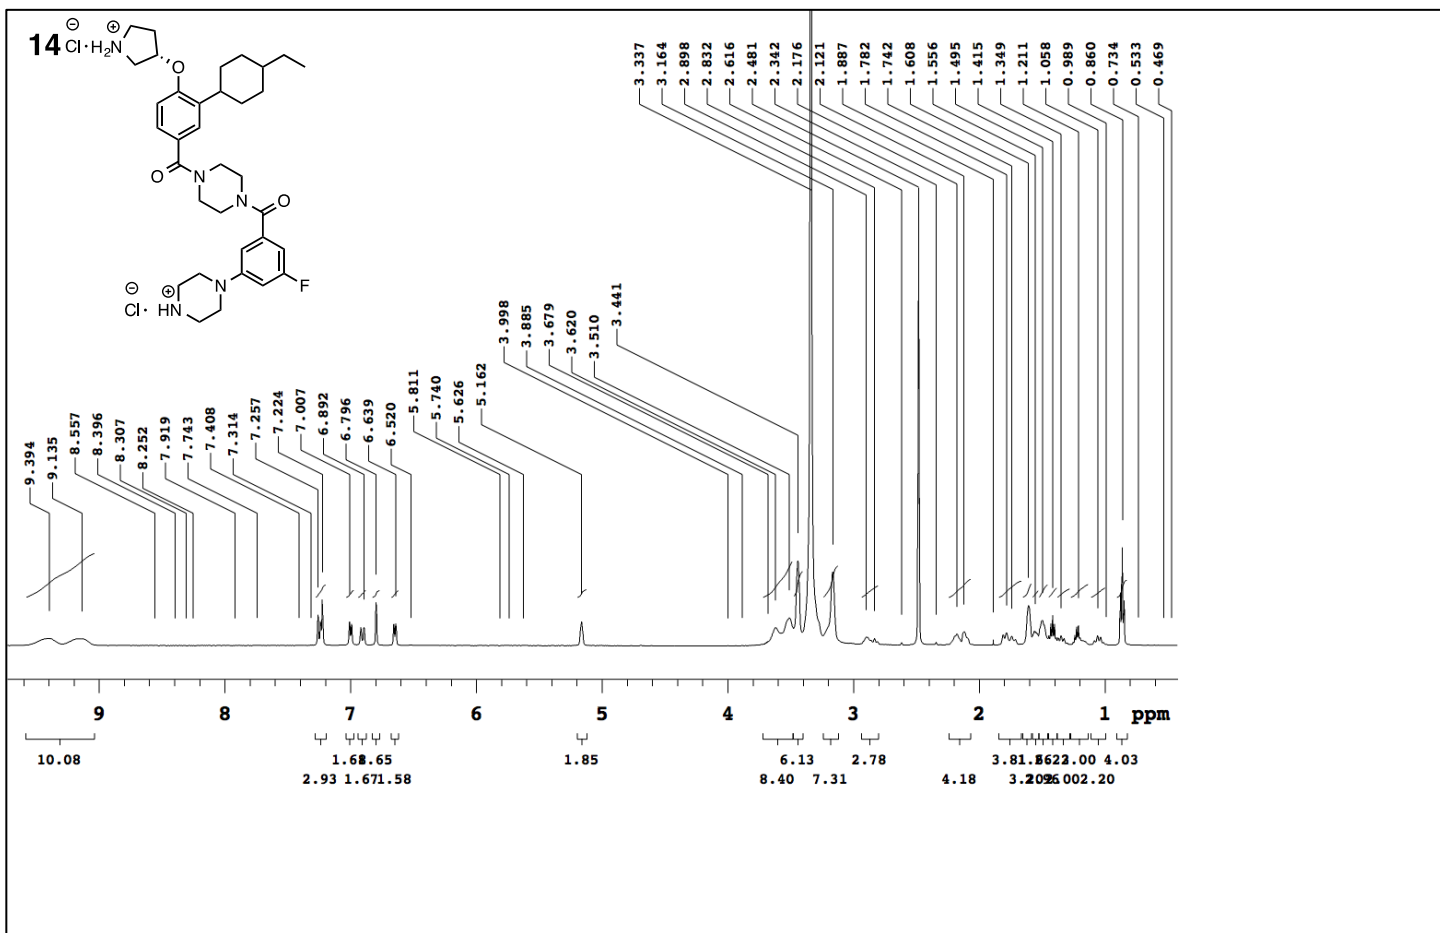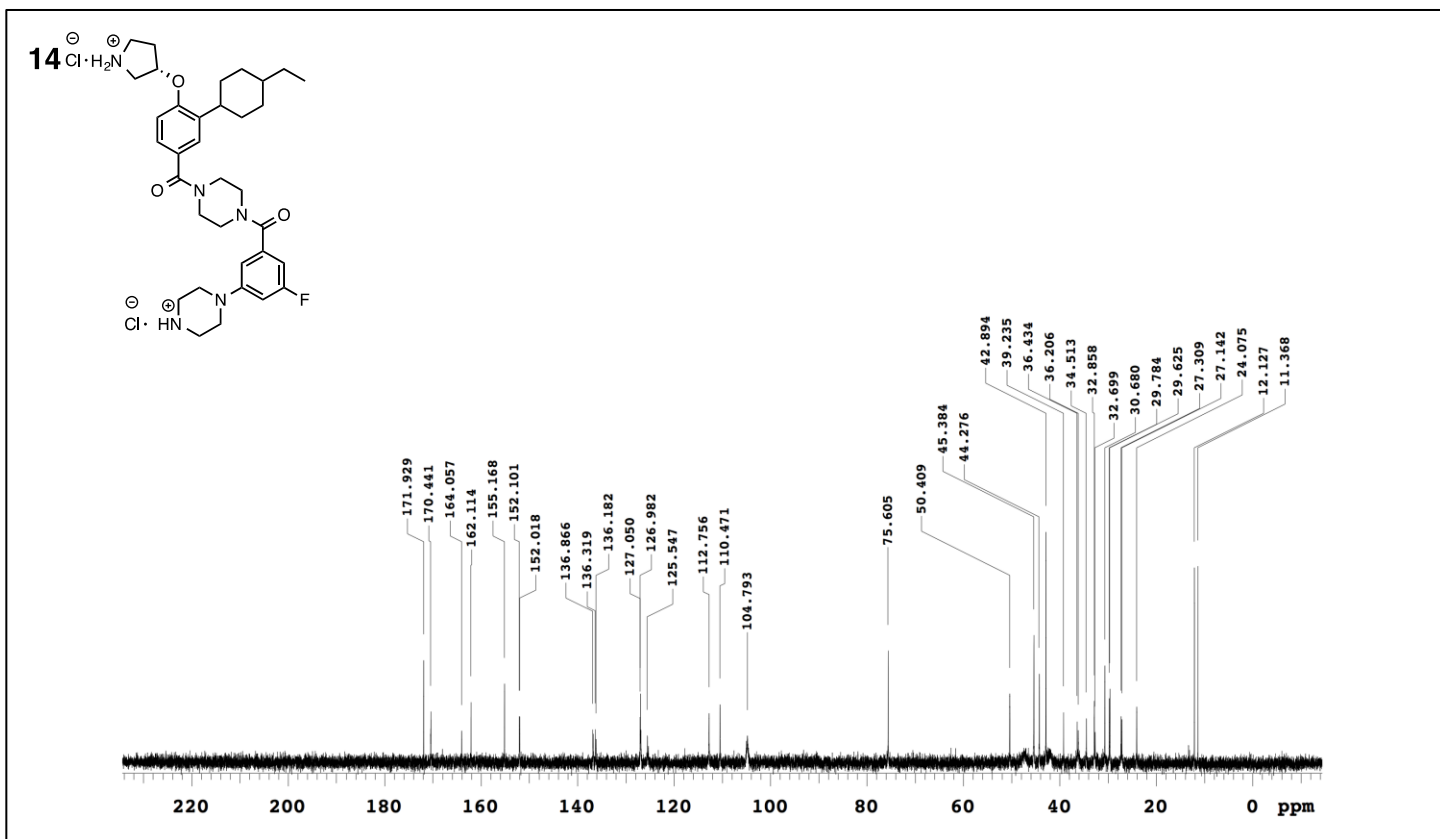



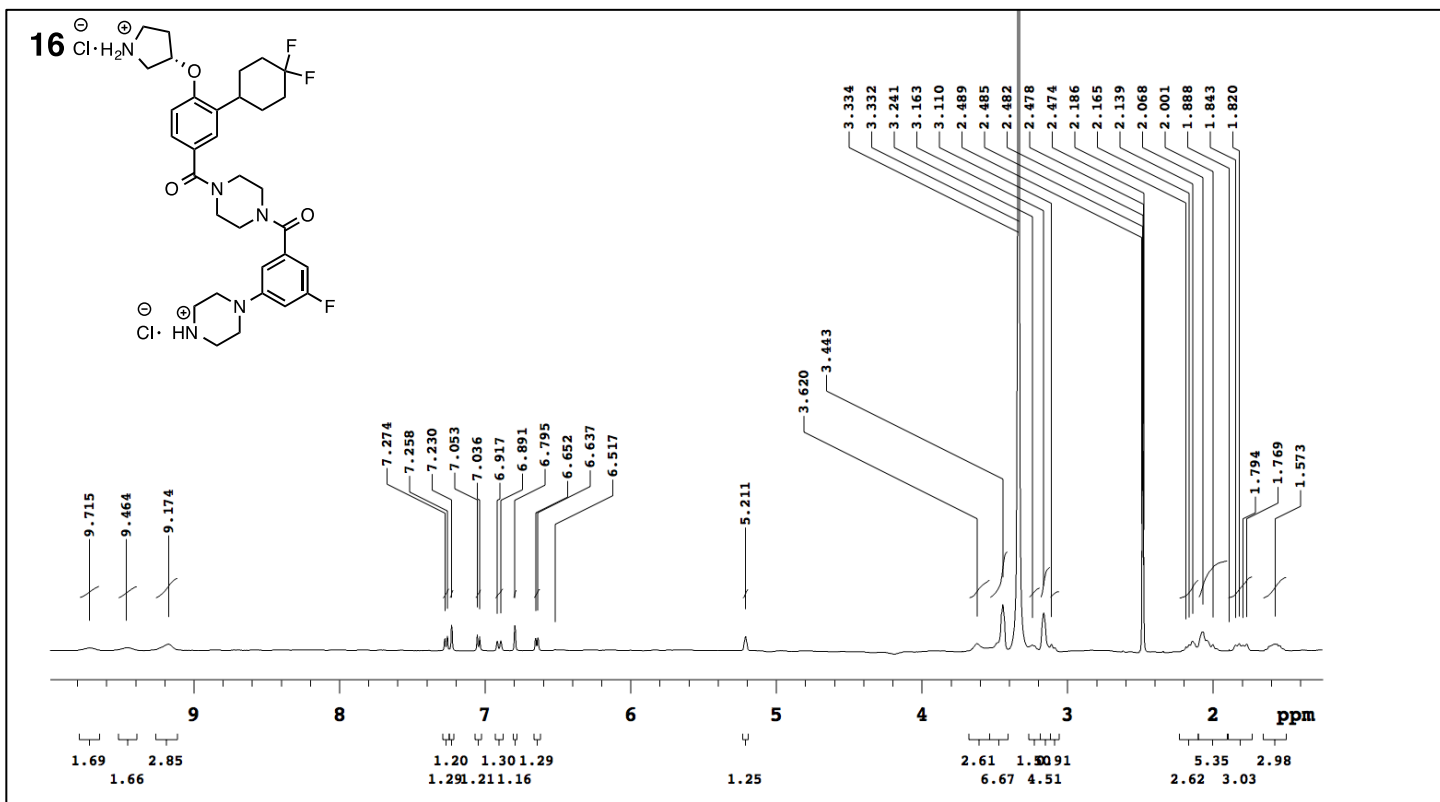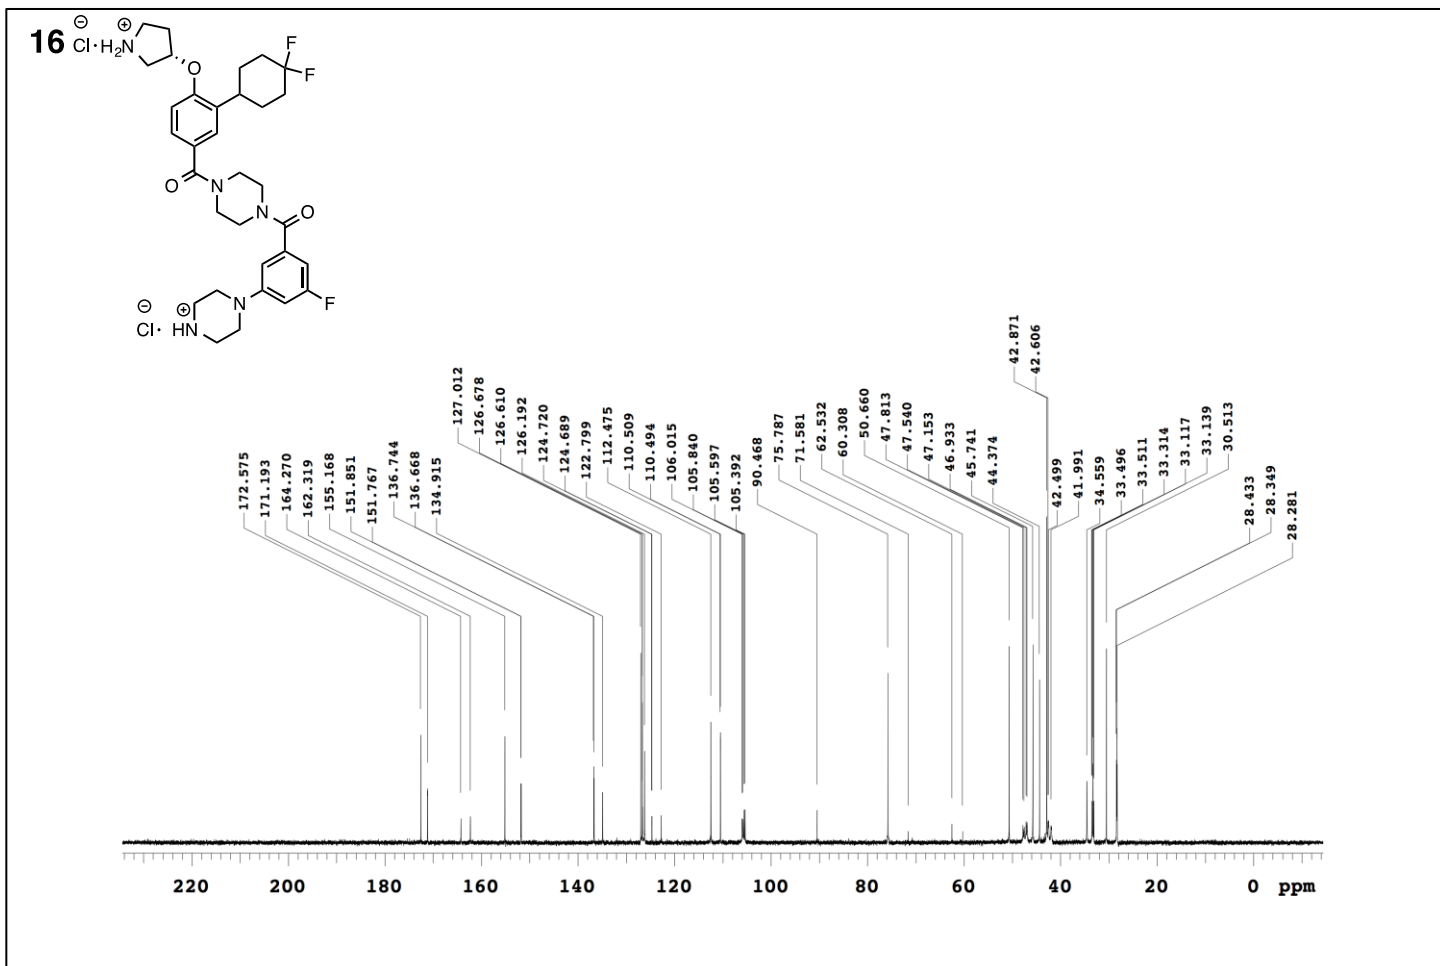

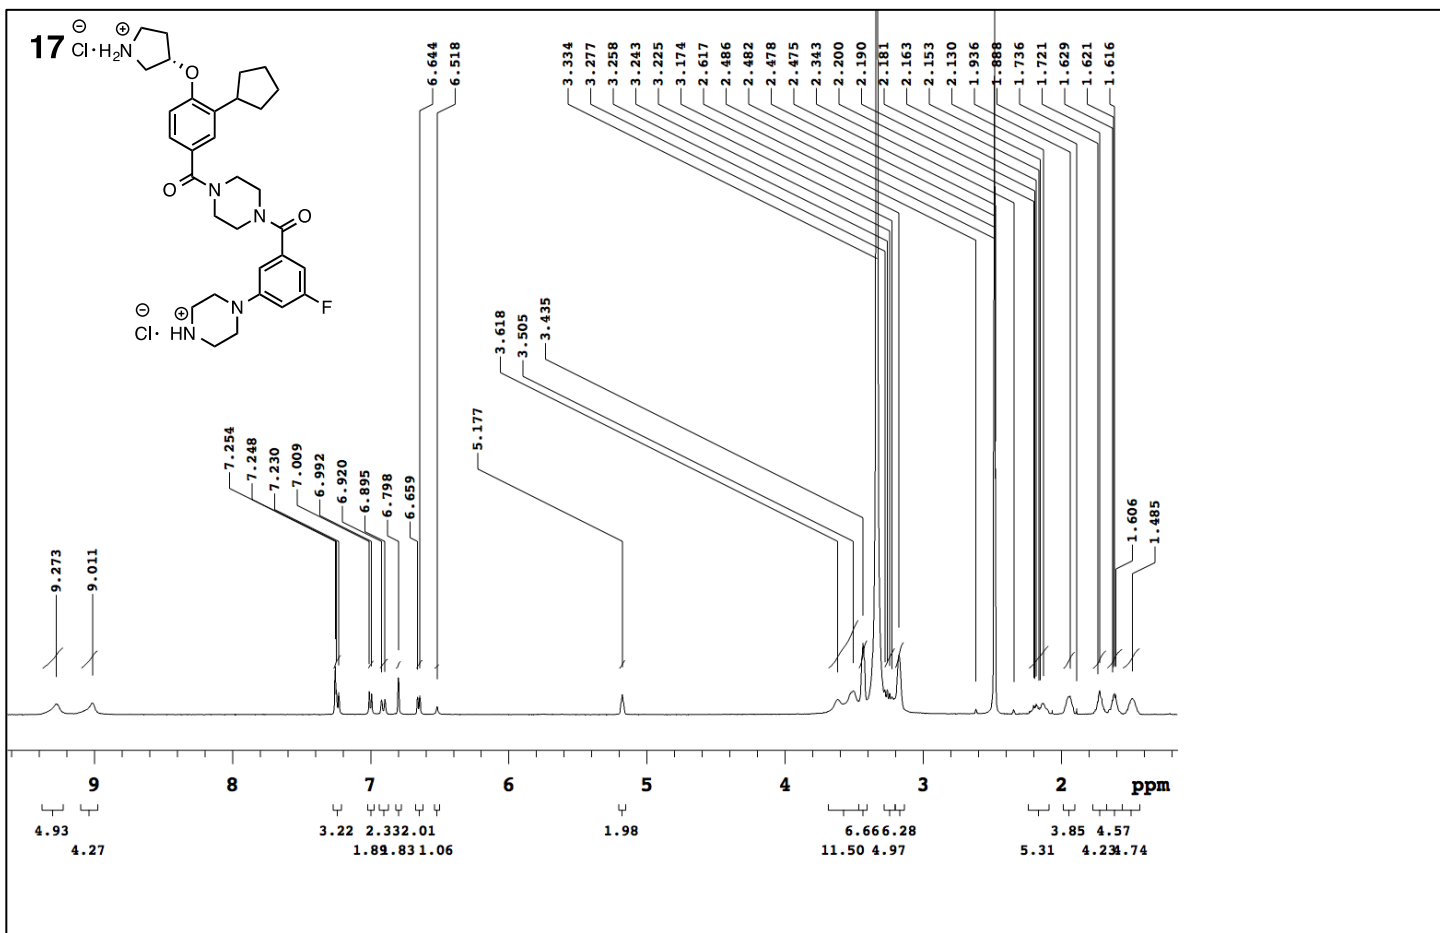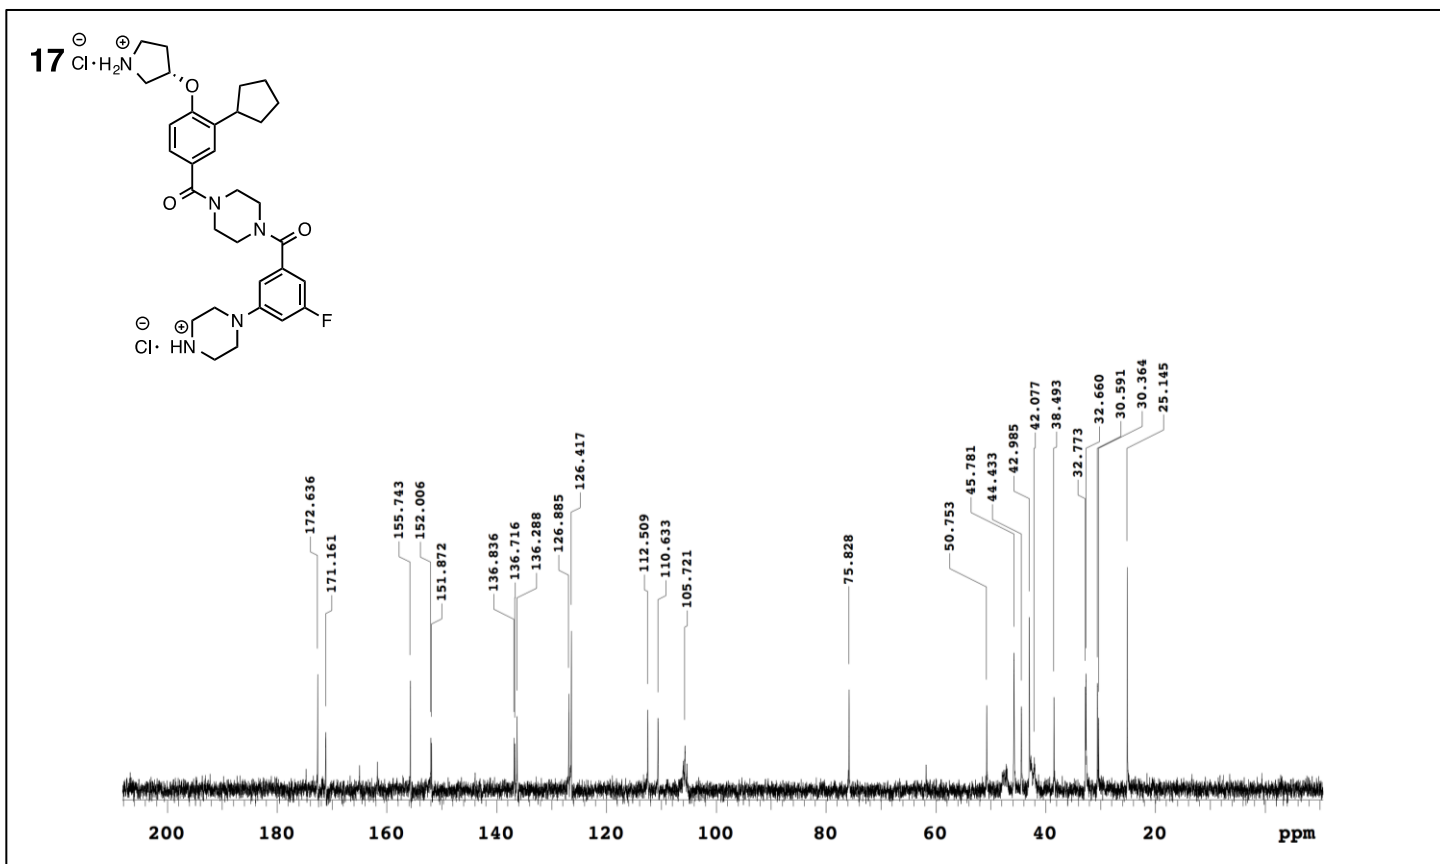

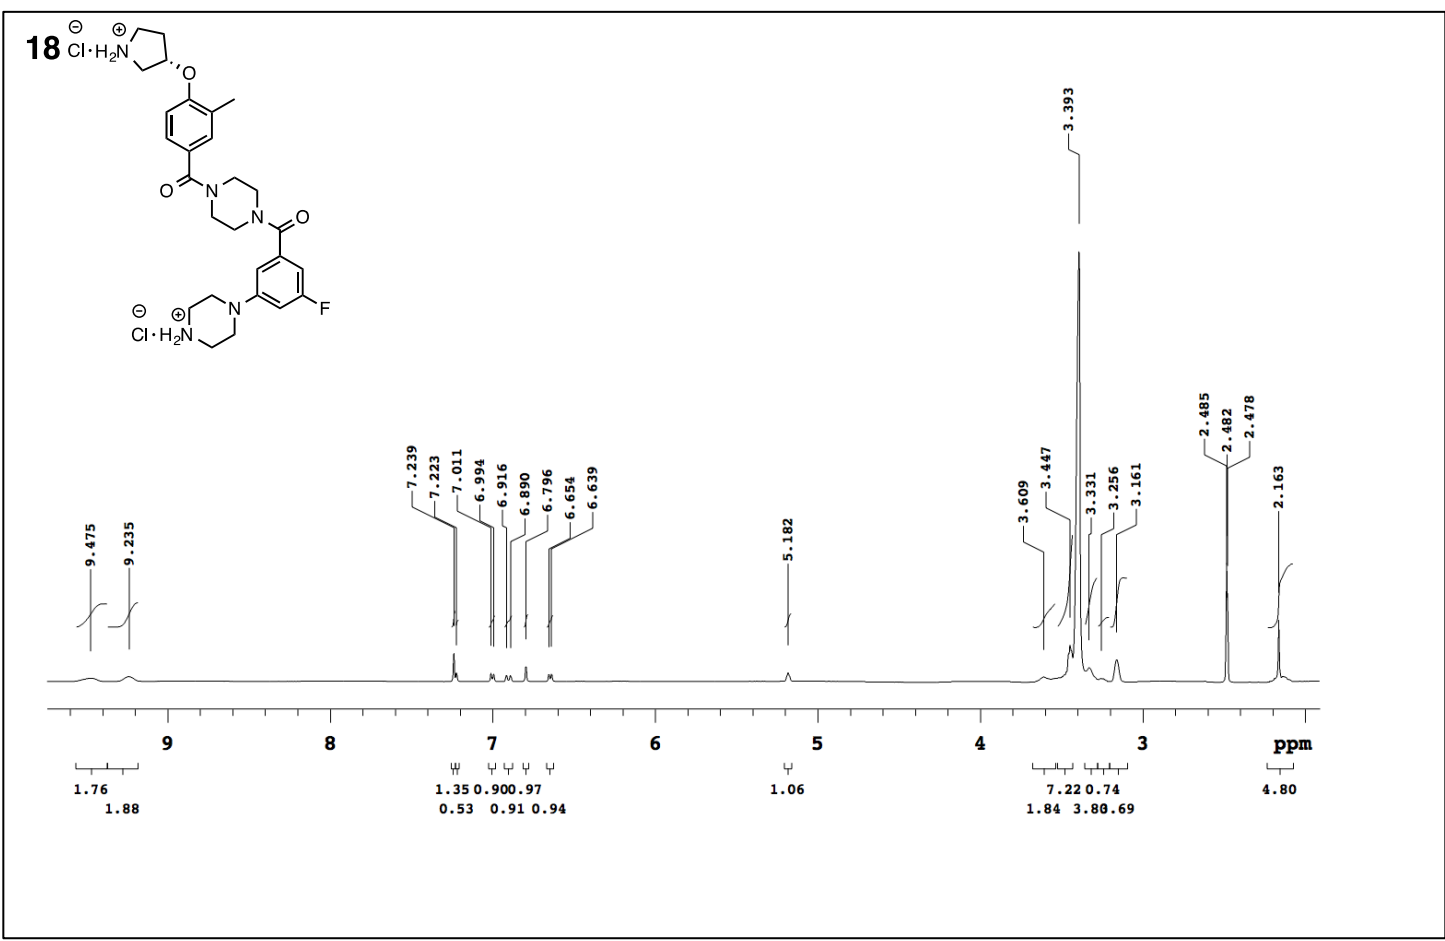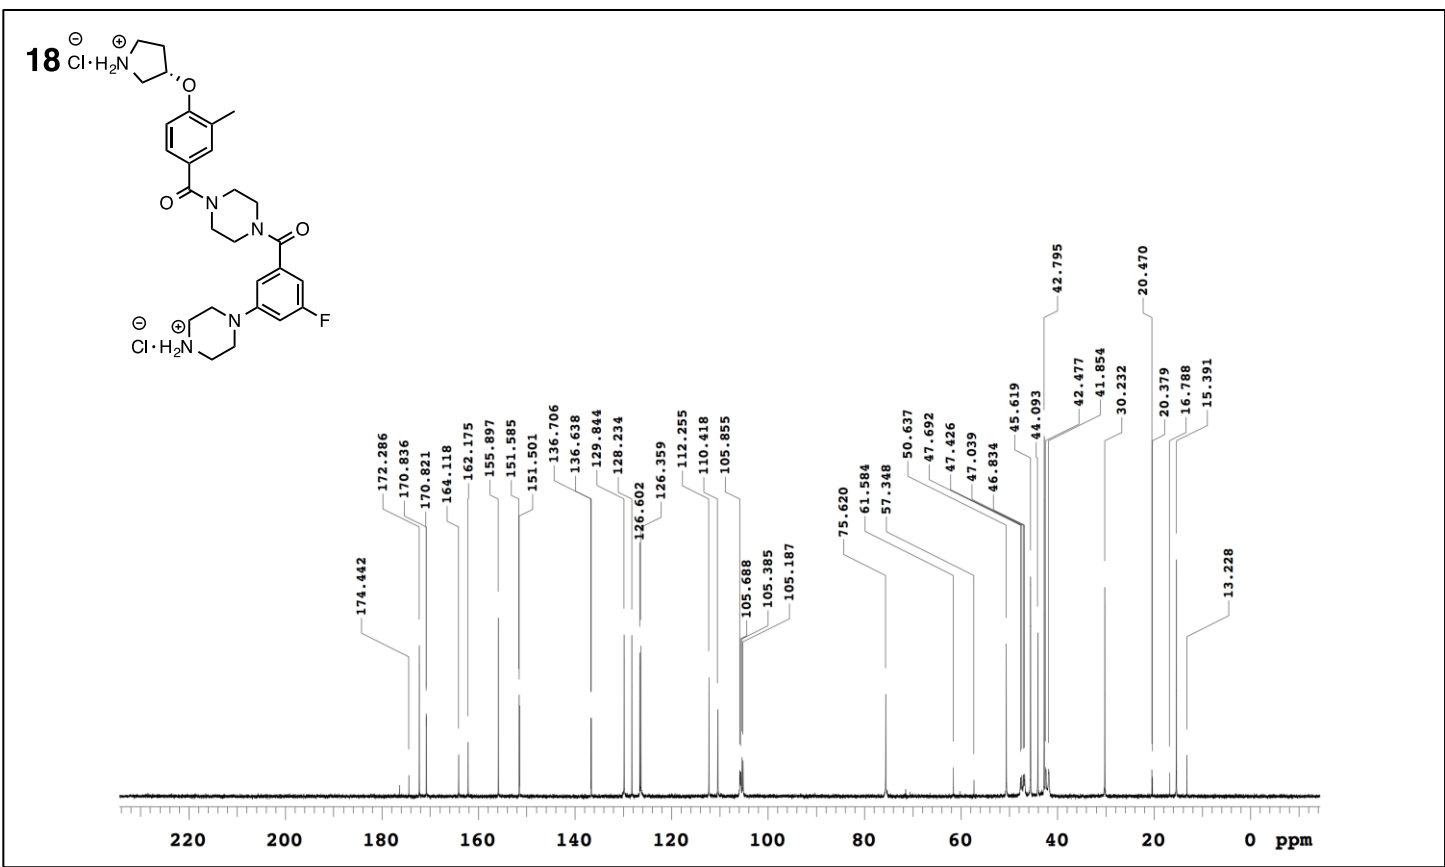

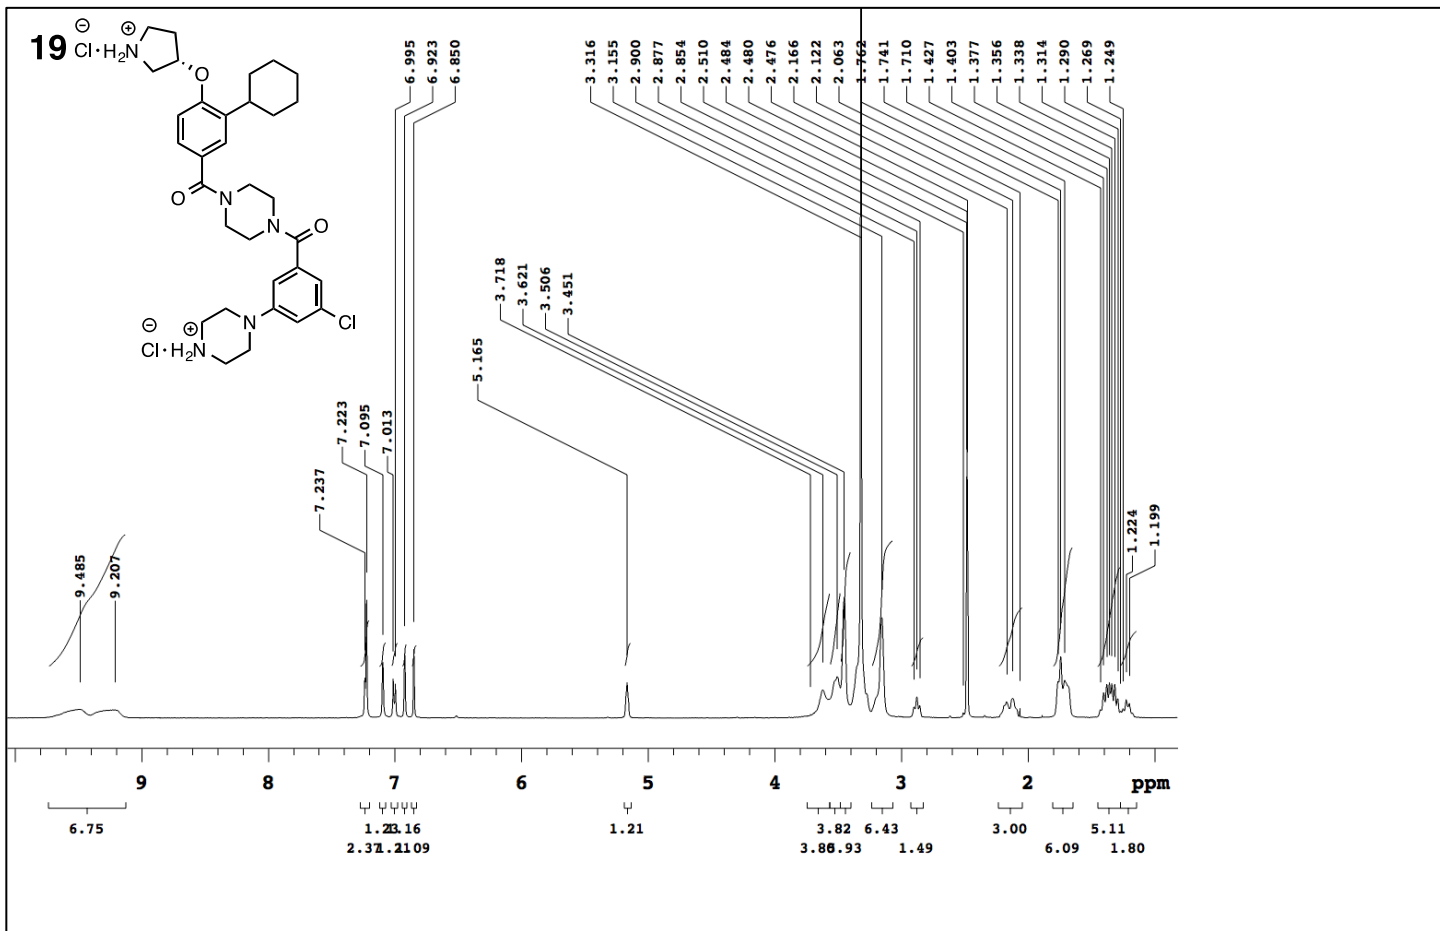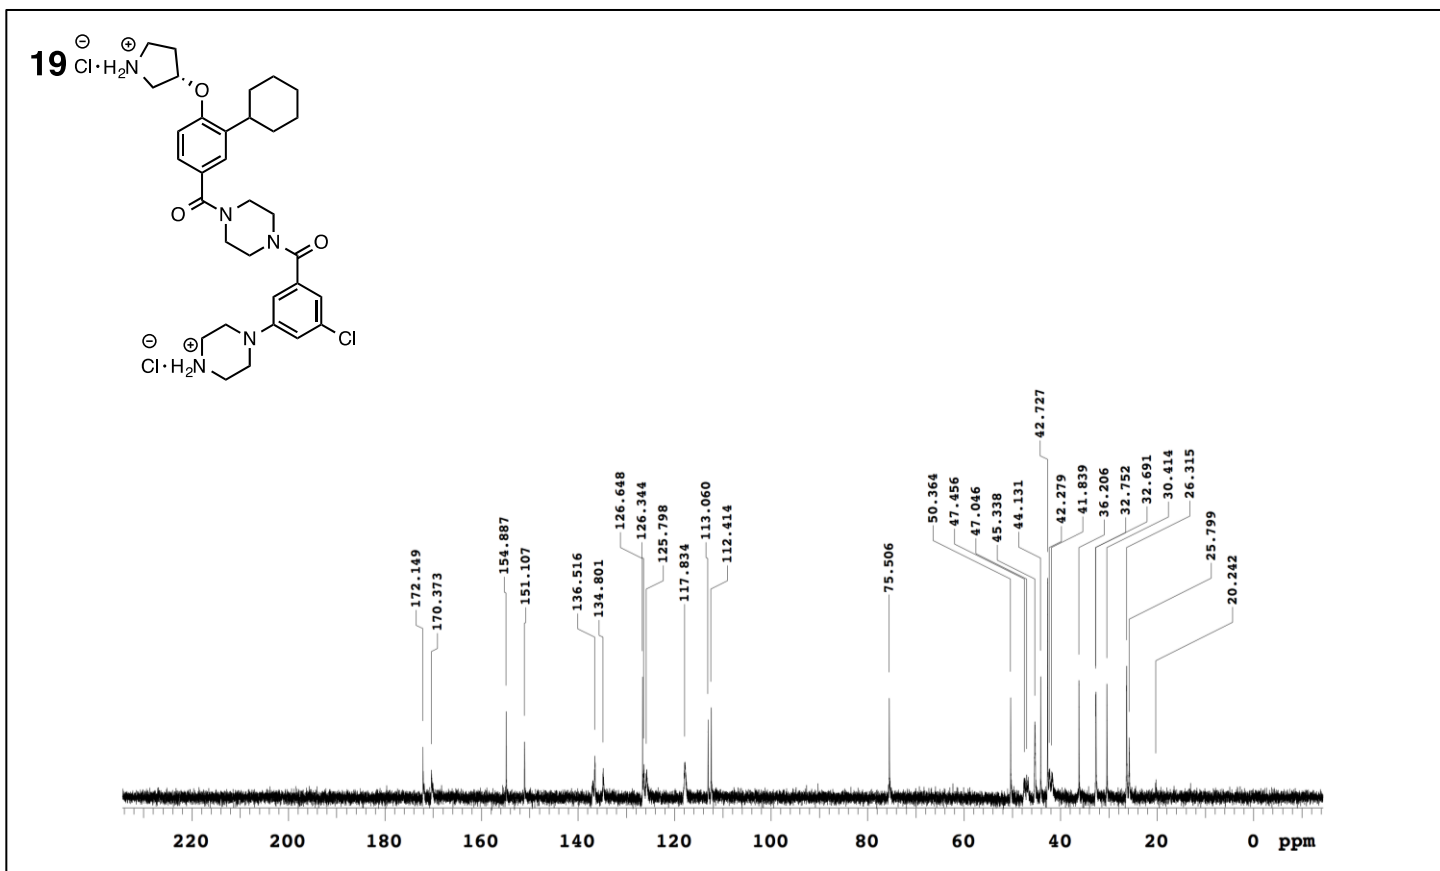

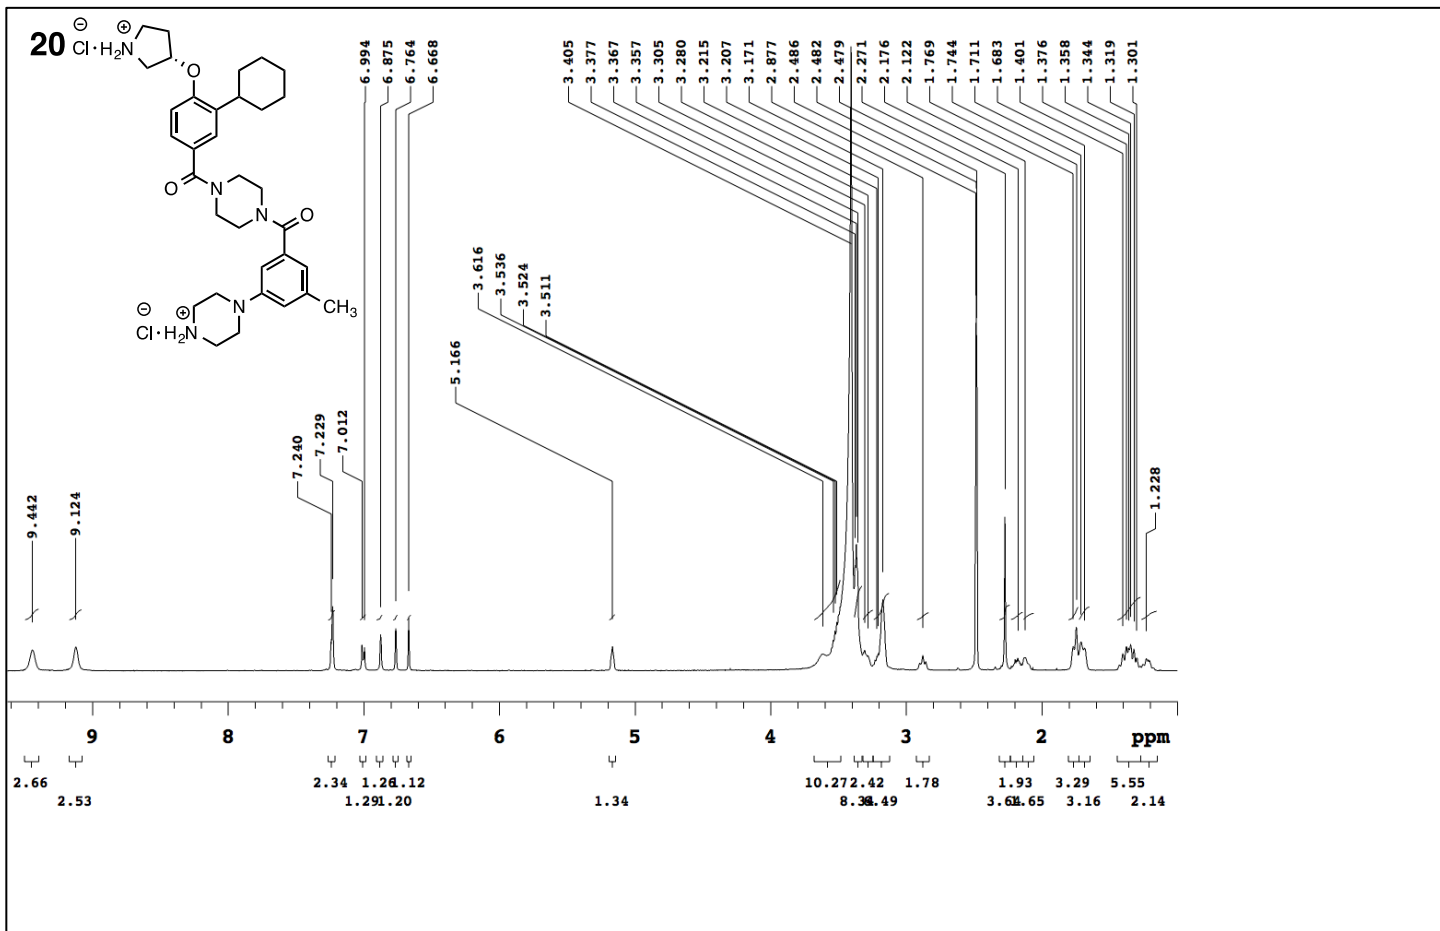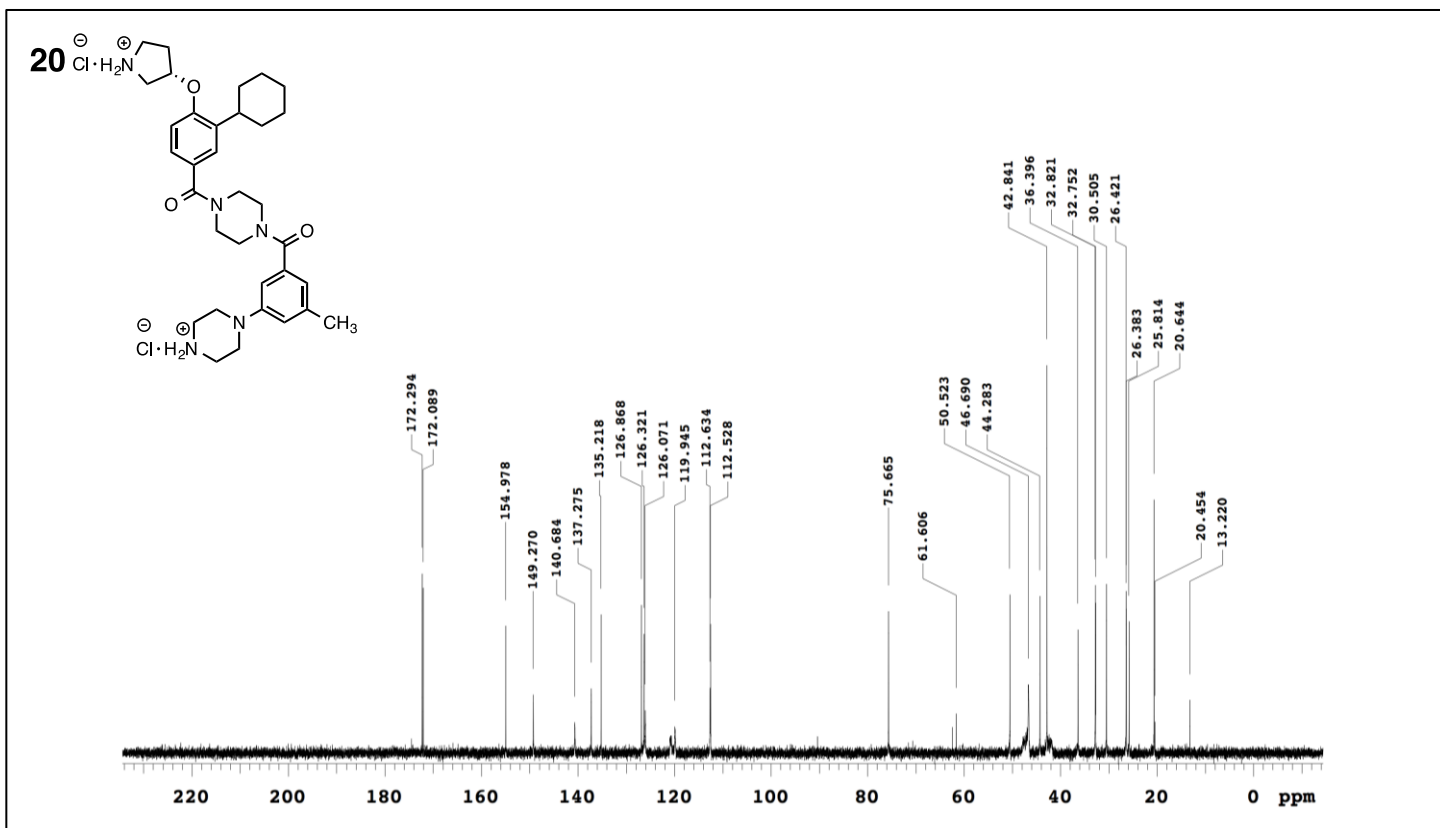

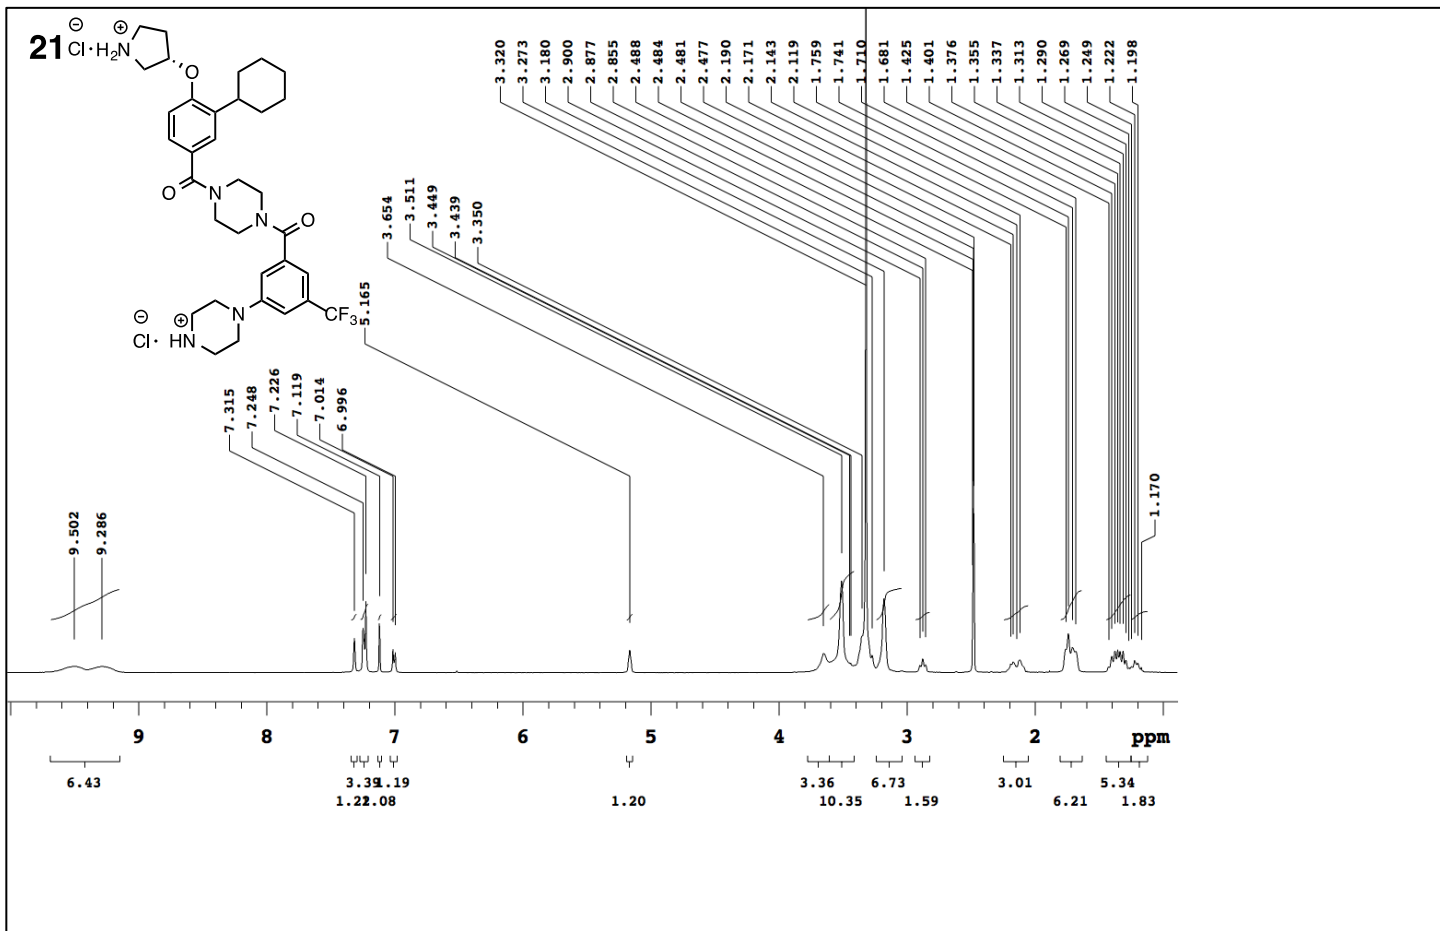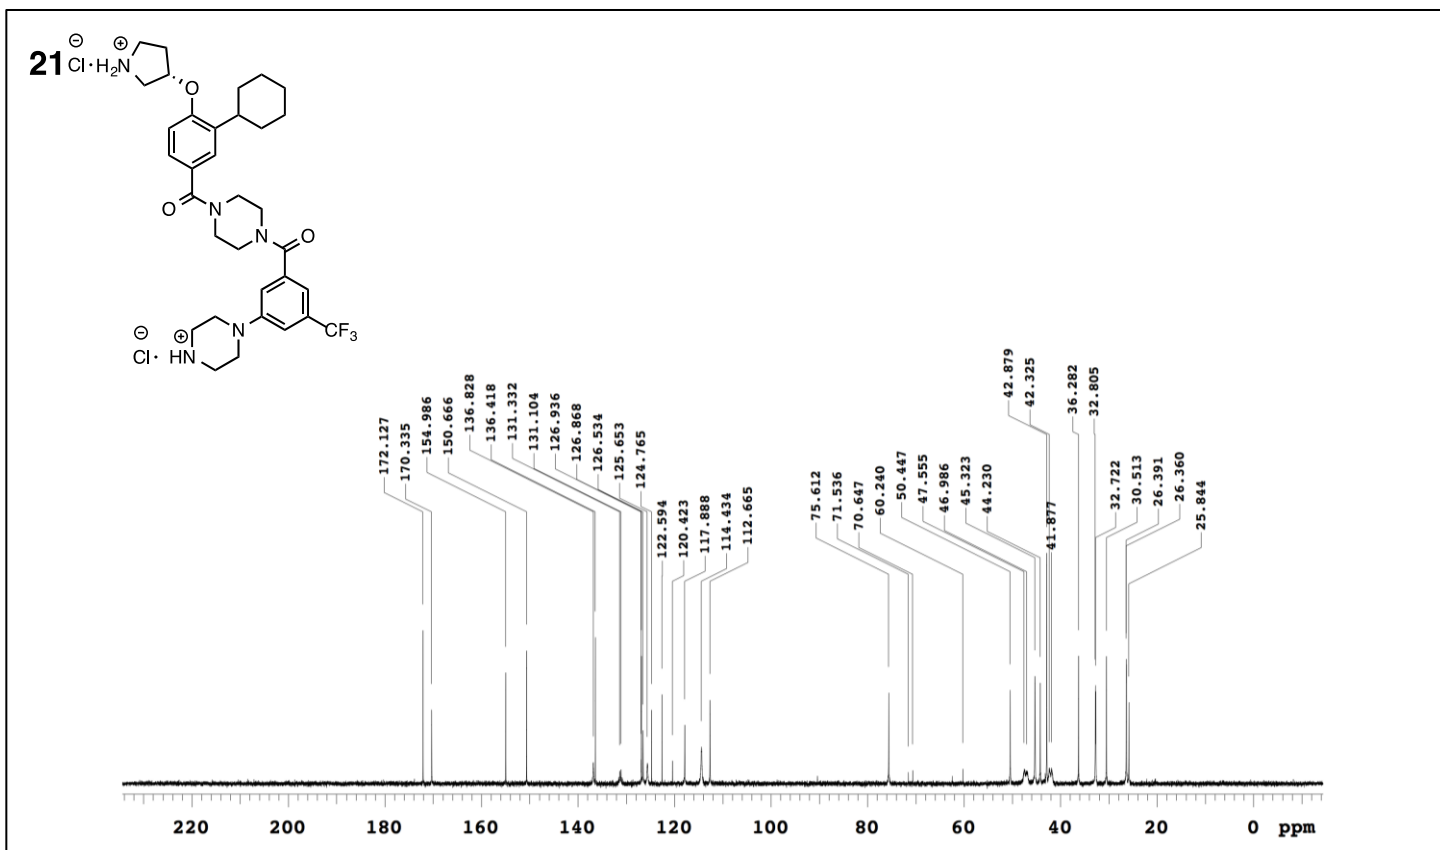



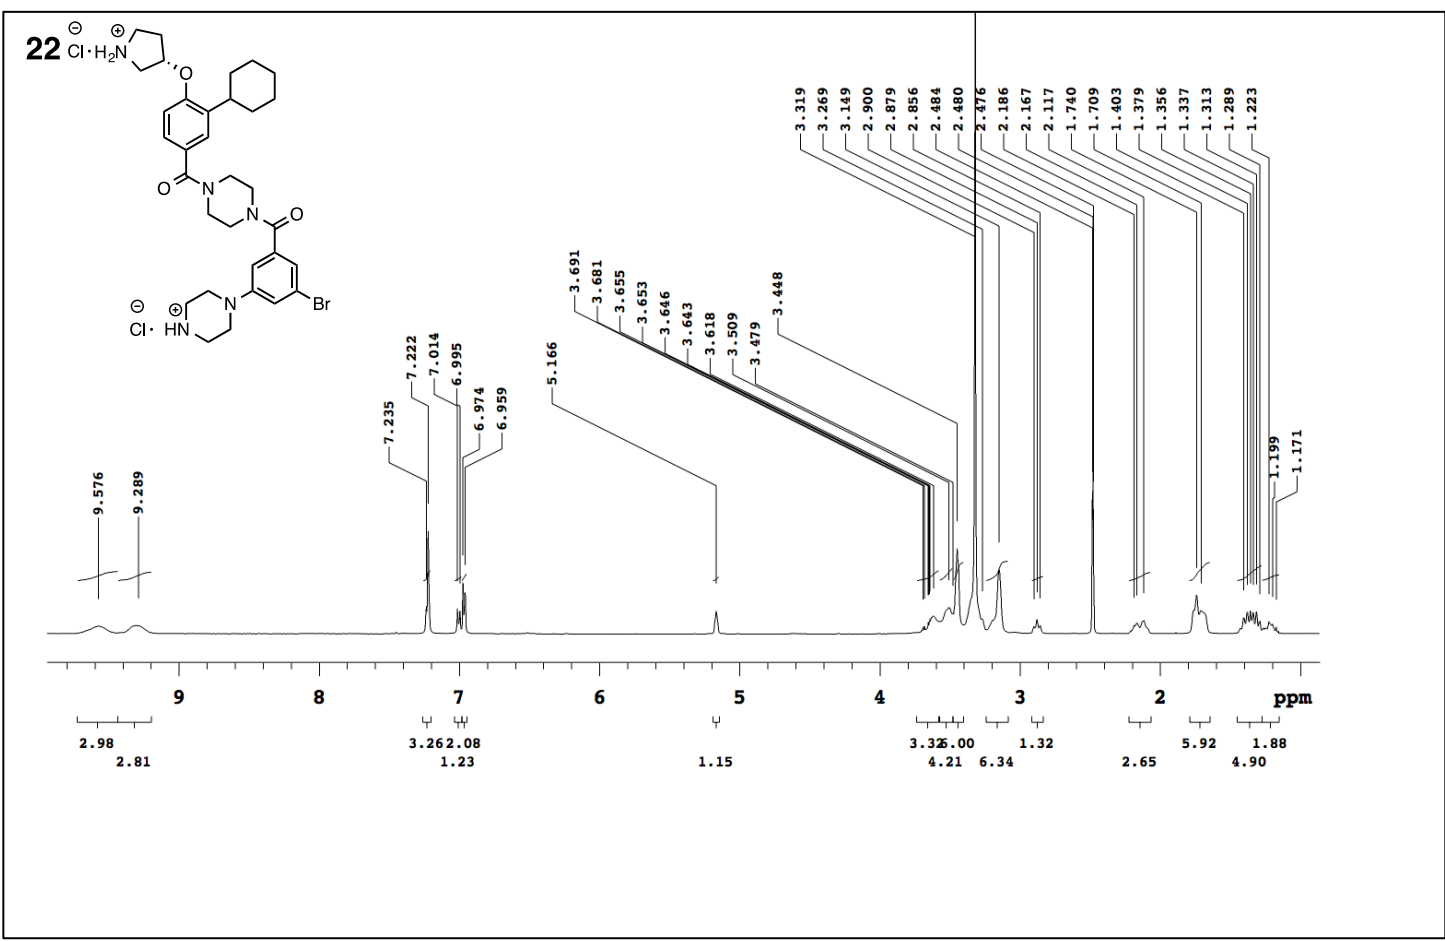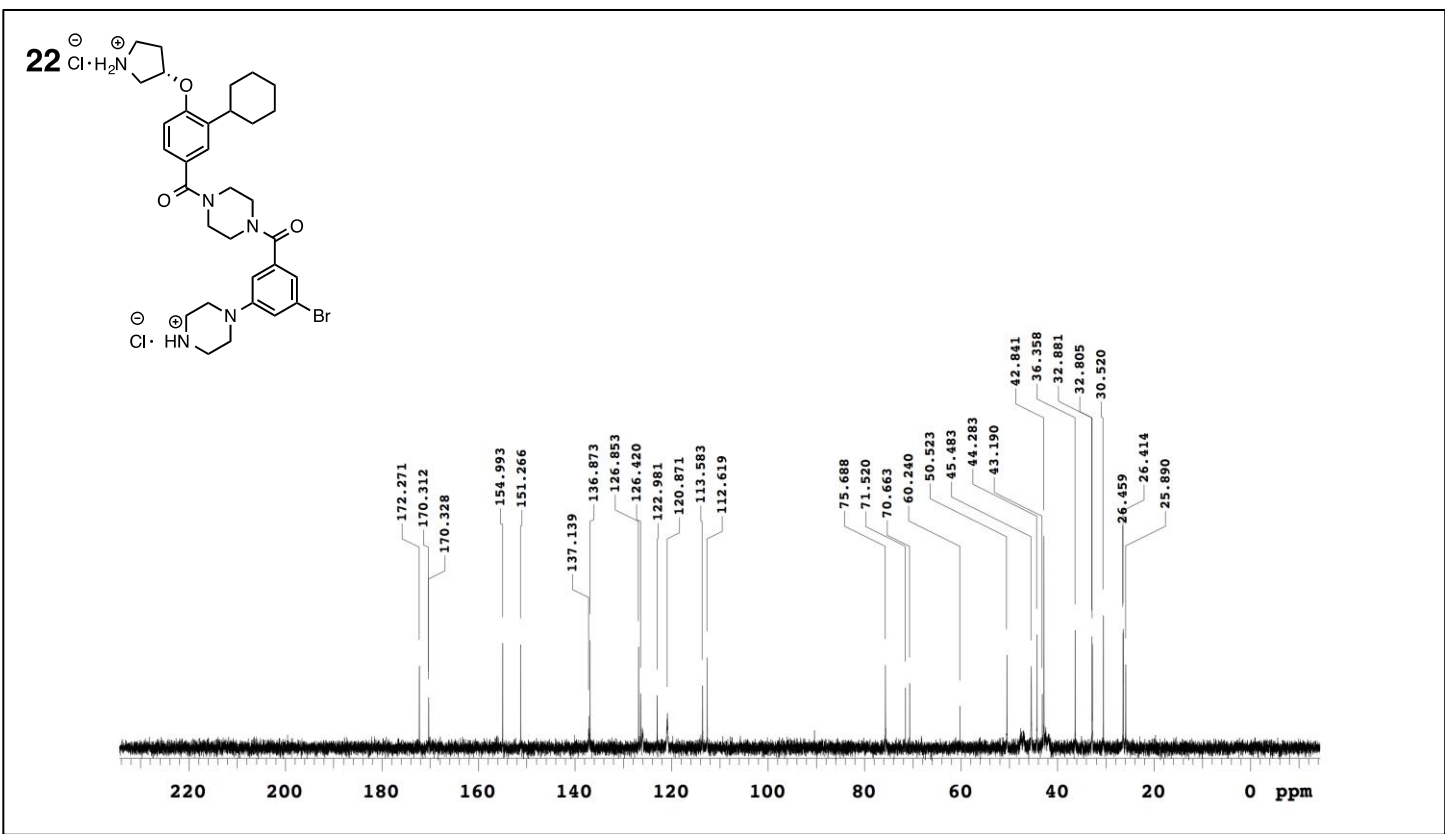

Supplement: ml5b00284_si_001.pdf [file ml5b00284_si_001.pdf]
